# Supplementary material for: Computational prediction of Homo sapiens–Candida albicans protein–protein interactions reveal key virulence factors using dual RNA-Seq data analysis
Source: Springer Nature journal article supplement (doi:10.1007/s00203-025-04312-4), 2025-04-06
Supplement: MOESM1 [file 203_2025_4312_MOESM1_ESM.xlsx]

## Sheet: filtered_interactions_Zscore
Homo sapiens genes	Candida albicans genes
A1CF_HUMAN	FOB64_000606_CANAX
A1CF_HUMAN	FOB64_004001_CANAX
A1CF_HUMAN	HAS1_CANAX
A1CF_HUMAN	NHP6_CANAX
A1CF_HUMAN	RNR2_CANAX
AAAS_HUMAN	FOB64_002635_CANAX
AAAS_HUMAN	NHP6_CANAX
AAAS_HUMAN	NIP7_CANAX
AAAS_HUMAN	NTF2_CANAX
AAAS_HUMAN	TOP2_CANAX
AACS_HUMAN	ACB1_CANAX
AACS_HUMAN	ERG10_CANAX
AACS_HUMAN	FBP1_CANAX
AACS_HUMAN	GFA1_CANAX
AACS_HUMAN	SOD1_CANAX
AACS_HUMAN	UBI4_CANAX
AADAT_HUMAN	SDH2_CANAX
AAGAB_HUMAN	FOB64_002244_CANAX
AAGAB_HUMAN	HAM1_CANAX
AANAT_HUMAN	FOB64_000215_CANAX
AANAT_HUMAN	FOB64_001129_CANAX
AANAT_HUMAN	FOB64_001558_CANAX
AANAT_HUMAN	FOB64_003553_CANAX
AANAT_HUMAN	FOB64_005313_CANAX
AANAT_HUMAN	FOB64_005613_CANAX
AANAT_HUMAN	FOB64_005962_CANAX
AANAT_HUMAN	FOB64_006072_CANAX
AANAT_HUMAN	GFA1_CANAX
AANAT_HUMAN	UBI4_CANAX
AASDHPPT_HUMAN	FRS1_CANAX
AASDHPPT_HUMAN	GFA1_CANAX
AASDHPPT_HUMAN	IMH3_CANAX
AASDHPPT_HUMAN	IPP1_CANAX
AASDHPPT_HUMAN	MET14_CANAX
AASDHPPT_HUMAN	TUB1_CANAX
AASDHPPT_HUMAN	URA3_CANAX
AASS_HUMAN	ALD5_CANAX
AATF_HUMAN	CBF5_CANAX
AATF_HUMAN	CDC21_CANAX
AATF_HUMAN	DIS3_CANAX
AATF_HUMAN	FOB64_000606_CANAX
AATF_HUMAN	FOB64_002335_CANAX
AATF_HUMAN	FOB64_004386_CANAX
AATF_HUMAN	FOB64_004607_CANAX
AATF_HUMAN	FOB64_005087_CANAX
AATF_HUMAN	HAS1_CANAX
AATF_HUMAN	KRR1_CANAX
AATF_HUMAN	NAT10_CANAX
AATF_HUMAN	NIP7_CANAX
AATF_HUMAN	NOG1_CANAX
AATF_HUMAN	PIN1_CANAX
AATF_HUMAN	RPA135_CANAX
AATF_HUMAN	RPB2_CANAX
AATF_HUMAN	RPB5_CANAX
AATF_HUMAN	RVB2_CANAX
ABCA12_HUMAN	GCN20_CANAX
ABCA12_HUMAN	SAR1_CANAX
ABCA12_HUMAN	UBI4_CANAX
ABCA13_HUMAN	GCN20_CANAX
ABCA13_HUMAN	TUB1_CANAX
ABCA13_HUMAN	UBI4_CANAX
ABCB10_HUMAN	SOD2_CANAX
ABCB8_HUMAN	SOD2_CANAX
ABCG1_HUMAN	ERG9_CANAX
ABHD10_HUMAN	FOB64_004262_CANAX
ABHD10_HUMAN	FOB64_006286_CANAX
ABHD10_HUMAN	LSC2_CANAX
ABHD10_HUMAN	SDH2_CANAX
ABHD10_HUMAN	SOD2_CANAX
ABHD10_HUMAN	SUCLG1_CANAX
ABHD10_HUMAN	swoH_CANAX
ABHD14A-ACY1_HUMAN	ACS1_CANAX
ABHD14A-ACY1_HUMAN	ADK2_CANAX
ABHD14A-ACY1_HUMAN	ERG10_CANAX
ABHD14A-ACY1_HUMAN	FOB64_000021_CANAX
ABHD14A-ACY1_HUMAN	FOB64_001558_CANAX
ABHD14A-ACY1_HUMAN	FOB64_002244_CANAX
ABHD14A-ACY1_HUMAN	FOB64_003907_CANAX
ABHD14A-ACY1_HUMAN	FOB64_003949_CANAX
ABHD14A-ACY1_HUMAN	FOB64_003968_CANAX
ABHD14A-ACY1_HUMAN	FOB64_004140_CANAX
ABHD14A-ACY1_HUMAN	FOB64_004371_CANAX
ABHD14A-ACY1_HUMAN	FOB64_004410_CANAX
ABHD14A-ACY1_HUMAN	FOB64_005415_CANAX
ABHD14A-ACY1_HUMAN	FOB64_005584_CANAX
ABHD14A-ACY1_HUMAN	FOB64_005613_CANAX
ABHD14A-ACY1_HUMAN	FOB64_005856_CANAX
ABHD14A-ACY1_HUMAN	FOB64_006640_CANAX
ABHD14A-ACY1_HUMAN	FOB64_006929_CANAX
ABHD14A-ACY1_HUMAN	GFA1_CANAX
ABHD14A-ACY1_HUMAN	HAM1_CANAX
ABHD14A-ACY1_HUMAN	MAP2_CANAX
ABHD14A-ACY1_HUMAN	RPL9B_CANAX
ABHD14A-ACY1_HUMAN	SOD1_CANAX
ABHD14A-ACY1_HUMAN	UBI4_CANAX
ABHD14A_HUMAN	ACB1_CANAX
ABHD14A_HUMAN	CaJ7.0207_CANAX
ABHD14A_HUMAN	FOB64_001854_CANAX
ABHD14A_HUMAN	FOB64_003553_CANAX
ABHD14A_HUMAN	FOB64_003907_CANAX
ABHD14A_HUMAN	FOB64_003968_CANAX
ABHD14A_HUMAN	FOB64_005962_CANAX
ABHD14A_HUMAN	FOB64_006072_CANAX
ABHD14A_HUMAN	HAM1_CANAX
ABHD14A_HUMAN	SPS19_CANAX
ABHD14A_HUMAN	TUB1_CANAX
ABHD14B_HUMAN	ACB1_CANAX
ABHD14B_HUMAN	FOB64_001976_CANAX
ABHD14B_HUMAN	FOB64_003553_CANAX
ABHD14B_HUMAN	FOB64_003907_CANAX
ABHD14B_HUMAN	FOB64_003968_CANAX
ABHD14B_HUMAN	FOB64_004828_CANAX
ABHD14B_HUMAN	FOB64_005962_CANAX
ABHD14B_HUMAN	FOB64_006072_CANAX
ABHD14B_HUMAN	FOB64_006640_CANAX
ABHD14B_HUMAN	FOB64_006910_CANAX
ABHD14B_HUMAN	SOD1_CANAX
ABHD14B_HUMAN	SPS19_CANAX
ABHD5_HUMAN	ACB1_CANAX
ABHD5_HUMAN	ADK2_CANAX
ABHD5_HUMAN	FOB64_000073_CANAX
ABHD5_HUMAN	FOB64_000480_CANAX
ABHD5_HUMAN	FOB64_000845_CANAX
ABHD5_HUMAN	FOB64_001129_CANAX
ABHD5_HUMAN	FOB64_001558_CANAX
ABHD5_HUMAN	FOB64_003553_CANAX
ABHD5_HUMAN	FOB64_003907_CANAX
ABHD5_HUMAN	FOB64_003949_CANAX
ABHD5_HUMAN	FOB64_003968_CANAX
ABHD5_HUMAN	FOB64_004505_CANAX
ABHD5_HUMAN	FOB64_004828_CANAX
ABHD5_HUMAN	FOB64_005313_CANAX
ABHD5_HUMAN	FOB64_005962_CANAX
ABHD5_HUMAN	FOB64_006072_CANAX
ABHD5_HUMAN	GTR2_CANAX
ABHD5_HUMAN	SAR1_CANAX
ABHD5_HUMAN	SPS19_CANAX
ABI1_HUMAN	ACB1_CANAX
ABI1_HUMAN	CDC3_CANAX
ABI1_HUMAN	FOB64_000215_CANAX
ABI1_HUMAN	FOB64_001558_CANAX
ABI1_HUMAN	FOB64_004140_CANAX
ABI1_HUMAN	FOB64_004345_CANAX
ABI1_HUMAN	FOB64_005415_CANAX
ABI1_HUMAN	PGK1_CANAX
ABI1_HUMAN	TUB1_CANAX
ABI2_HUMAN	CDC3_CANAX
ABI2_HUMAN	SAR1_CANAX
ABI2_HUMAN	SOD1_CANAX
ABI3_HUMAN	FOB64_000215_CANAX
ABI3_HUMAN	FOB64_004345_CANAX
ABI3_HUMAN	FOB64_006628_CANAX
ABI3_HUMAN	RPS10A_CANAX
ABI3_HUMAN	RPS22A_CANAX
ABL1_HUMAN	CDC3_CANAX
ABL1_HUMAN	FOB64_000215_CANAX
ABL1_HUMAN	FOB64_001558_CANAX
ABL1_HUMAN	FOB64_003553_CANAX
ABL1_HUMAN	FOB64_003625_CANAX
ABL1_HUMAN	FOB64_003968_CANAX
ABL1_HUMAN	FOB64_004410_CANAX
ABL1_HUMAN	FOB64_004828_CANAX
ABL1_HUMAN	FOB64_005313_CANAX
ABL1_HUMAN	FOB64_005415_CANAX
ABL1_HUMAN	FOB64_005675_CANAX
ABL1_HUMAN	FOB64_005942_CANAX
ABL1_HUMAN	FOB64_006072_CANAX
ABL1_HUMAN	FOB64_006929_CANAX
ABL1_HUMAN	GUK1_CANAX
ABL1_HUMAN	IMH3_CANAX
ABL1_HUMAN	PGK1_CANAX
ABL1_HUMAN	SOD1_CANAX
ABL1_HUMAN	TUB1_CANAX
ABL1_HUMAN	UBI4_CANAX
ABL2_HUMAN	FOB64_000215_CANAX
ABL2_HUMAN	FOB64_001558_CANAX
ABL2_HUMAN	FOB64_003553_CANAX
ABL2_HUMAN	FOB64_004828_CANAX
ABL2_HUMAN	FOB64_005313_CANAX
ABL2_HUMAN	FOB64_005415_CANAX
ABL2_HUMAN	FOB64_006072_CANAX
ABL2_HUMAN	FOB64_006732_CANAX
ABL2_HUMAN	IMH3_CANAX
ABL2_HUMAN	UBI4_CANAX
ABLIM1_HUMAN	FOB64_005675_CANAX
ABLIM1_HUMAN	TUB1_CANAX
ABLIM2_HUMAN	FOB64_000215_CANAX
ABLIM2_HUMAN	RPS10A_CANAX
ABLIM2_HUMAN	TUB1_CANAX
ABLIM3_HUMAN	CDC3_CANAX
ABLIM3_HUMAN	TUB1_CANAX
ABRA_HUMAN	FBP1_CANAX
ABRAXAS2_HUMAN	HAM1_CANAX
ABRAXAS2_HUMAN	TUB1_CANAX
ABRAXAS2_HUMAN	UBI4_CANAX
ABT1_HUMAN	CBF5_CANAX
ABT1_HUMAN	FOB64_000606_CANAX
ABT1_HUMAN	FOB64_002335_CANAX
ABT1_HUMAN	FOB64_004386_CANAX
ABT1_HUMAN	HAS1_CANAX
ABT1_HUMAN	KRR1_CANAX
ABT1_HUMAN	NAT10_CANAX
ABT1_HUMAN	NIP7_CANAX
ABT1_HUMAN	NOG1_CANAX
ABT1_HUMAN	PPH3_CANAX
ABT1_HUMAN	RPA135_CANAX
ABT1_HUMAN	RPB2_CANAX
ABT1_HUMAN	RPB5_CANAX
ABT1_HUMAN	RVB2_CANAX
ABT1_HUMAN	SRP54_CANAX
ABTB1_HUMAN	FOB64_000073_CANAX
ABTB1_HUMAN	FOB64_004345_CANAX
ABTB1_HUMAN	FOB64_004828_CANAX
ABTB1_HUMAN	FOB64_005313_CANAX
ABTB1_HUMAN	FOB64_005675_CANAX
ABTB1_HUMAN	FOB64_006756_CANAX
ABTB1_HUMAN	UBI4_CANAX
ACAA2_HUMAN	ALD5_CANAX
ACAA2_HUMAN	LSC2_CANAX
ACAA2_HUMAN	SDH2_CANAX
ACAA2_HUMAN	SOD2_CANAX
ACAD8_HUMAN	Etfb_CANAX
ACAD8_HUMAN	FOB64_001397_CANAX
ACAD8_HUMAN	FOB64_002876_CANAX
ACAD8_HUMAN	FOB64_004262_CANAX
ACAD8_HUMAN	FOB64_005305_CANAX
ACAD8_HUMAN	FOB64_006286_CANAX
ACAD8_HUMAN	LSC2_CANAX
ACAD8_HUMAN	SDH2_CANAX
ACAD8_HUMAN	SUCLG1_CANAX
ACAD8_HUMAN	swoH_CANAX
ACAD9_HUMAN	LSC2_CANAX
ACAD9_HUMAN	SDH2_CANAX
ACAD9_HUMAN	SOD2_CANAX
ACADL_HUMAN	ALD5_CANAX
ACADL_HUMAN	LSC2_CANAX
ACADL_HUMAN	MAE1_CANAX
ACADL_HUMAN	SDH2_CANAX
ACADL_HUMAN	SOD2_CANAX
ACADM_HUMAN	LSC2_CANAX
ACADM_HUMAN	MAE1_CANAX
ACADM_HUMAN	SDH2_CANAX
ACADM_HUMAN	SOD2_CANAX
ACADSB_HUMAN	Etfb_CANAX
ACADSB_HUMAN	FOB64_001397_CANAX
ACADSB_HUMAN	FOB64_002876_CANAX
ACADSB_HUMAN	FOB64_003587_CANAX
ACADSB_HUMAN	FOB64_004262_CANAX
ACADSB_HUMAN	FOB64_005305_CANAX
ACADSB_HUMAN	FOB64_006286_CANAX
ACADSB_HUMAN	FOB64_006771_CANAX
ACADSB_HUMAN	HSP10_CANAX
ACADSB_HUMAN	LSC2_CANAX
ACADSB_HUMAN	SDH2_CANAX
ACADSB_HUMAN	SUCLG1_CANAX
ACADS_HUMAN	Etfb_CANAX
ACADS_HUMAN	FOB64_001397_CANAX
ACADS_HUMAN	FOB64_002876_CANAX
ACADS_HUMAN	FOB64_004262_CANAX
ACADS_HUMAN	FOB64_005305_CANAX
ACADS_HUMAN	FOB64_006286_CANAX
ACADS_HUMAN	FOB64_006771_CANAX
ACADS_HUMAN	HSP10_CANAX
ACADS_HUMAN	LSC2_CANAX
ACADS_HUMAN	SDH2_CANAX
ACADS_HUMAN	SOD2_CANAX
ACADS_HUMAN	SUCLG1_CANAX
ACADVL_HUMAN	LSC2_CANAX
ACADVL_HUMAN	SDH2_CANAX
ACADVL_HUMAN	SOD2_CANAX
ACD_HUMAN	FOB64_004386_CANAX
ACIN1_HUMAN	FOB64_000606_CANAX
ACIN1_HUMAN	FOB64_002335_CANAX
ACIN1_HUMAN	FOB64_003145_CANAX
ACIN1_HUMAN	FOB64_004001_CANAX
ACIN1_HUMAN	FOB64_005814_CANAX
ACIN1_HUMAN	FOB64_006022_CANAX
ACIN1_HUMAN	HAS1_CANAX
ACIN1_HUMAN	NHP6_CANAX
ACIN1_HUMAN	PPH3_CANAX
ACIN1_HUMAN	RVB2_CANAX
ACIN1_HUMAN	TOP2_CANAX
ACLY_HUMAN	ACB1_CANAX
ACLY_HUMAN	EFT2_CANAX
ACLY_HUMAN	ERG10_CANAX
ACLY_HUMAN	FBP1_CANAX
ACLY_HUMAN	GCD11_CANAX
ACLY_HUMAN	GFA1_CANAX
ACLY_HUMAN	GPM1_CANAX
ACLY_HUMAN	IMH3_CANAX
ACLY_HUMAN	IPP1_CANAX
ACLY_HUMAN	MET14_CANAX
ACLY_HUMAN	PGK1_CANAX
ACLY_HUMAN	RPL20B_CANAX
ACLY_HUMAN	RPT5_CANAX
ACLY_HUMAN	TPK2_CANAX
ACLY_HUMAN	TUB1_CANAX
ACLY_HUMAN	UBI4_CANAX
ACLY_HUMAN	URA3_CANAX
ACO1_HUMAN	AAT2_CANAX
ACO1_HUMAN	ACB1_CANAX
ACO1_HUMAN	ACS1_CANAX
ACO1_HUMAN	ADK2_CANAX
ACO1_HUMAN	AGM1_CANAX
ACO1_HUMAN	ALA1_CANAX
ACO1_HUMAN	CaJ7.0207_CANAX
ACO1_HUMAN	cdc22_CANAX
ACO1_HUMAN	CFD1_CANAX
ACO1_HUMAN	CRM1_CANAX
ACO1_HUMAN	DUT1_CANAX
ACO1_HUMAN	EFT2_CANAX
ACO1_HUMAN	ERG10_CANAX
ACO1_HUMAN	FBP1_CANAX
ACO1_HUMAN	FOB64_000021_CANAX
ACO1_HUMAN	FOB64_000215_CANAX
ACO1_HUMAN	FOB64_000307_CANAX
ACO1_HUMAN	FOB64_000466_CANAX
ACO1_HUMAN	FOB64_000614_CANAX
ACO1_HUMAN	FOB64_000843_CANAX
ACO1_HUMAN	FOB64_000845_CANAX
ACO1_HUMAN	FOB64_000857_CANAX
ACO1_HUMAN	FOB64_001129_CANAX
ACO1_HUMAN	FOB64_001293_CANAX
ACO1_HUMAN	FOB64_001404_CANAX
ACO1_HUMAN	FOB64_001558_CANAX
ACO1_HUMAN	FOB64_001589_CANAX
ACO1_HUMAN	FOB64_001732_CANAX
ACO1_HUMAN	FOB64_001854_CANAX
ACO1_HUMAN	FOB64_001966_CANAX
ACO1_HUMAN	FOB64_001976_CANAX
ACO1_HUMAN	FOB64_002146_CANAX
ACO1_HUMAN	FOB64_002221_CANAX
ACO1_HUMAN	FOB64_002235_CANAX
ACO1_HUMAN	FOB64_002244_CANAX
ACO1_HUMAN	FOB64_002507_CANAX
ACO1_HUMAN	FOB64_002789_CANAX
ACO1_HUMAN	FOB64_003740_CANAX
ACO1_HUMAN	FOB64_003855_CANAX
ACO1_HUMAN	FOB64_003941_CANAX
ACO1_HUMAN	FOB64_003949_CANAX
ACO1_HUMAN	FOB64_003968_CANAX
ACO1_HUMAN	FOB64_004140_CANAX
ACO1_HUMAN	FOB64_004345_CANAX
ACO1_HUMAN	FOB64_004371_CANAX
ACO1_HUMAN	FOB64_004583_CANAX
ACO1_HUMAN	FOB64_004828_CANAX
ACO1_HUMAN	FOB64_004930_CANAX
ACO1_HUMAN	FOB64_005014_CANAX
ACO1_HUMAN	FOB64_005276_CANAX
ACO1_HUMAN	FOB64_005311_CANAX
ACO1_HUMAN	FOB64_005487_CANAX
ACO1_HUMAN	FOB64_005494_CANAX
ACO1_HUMAN	FOB64_005502_CANAX
ACO1_HUMAN	FOB64_005584_CANAX
ACO1_HUMAN	FOB64_005606_CANAX
ACO1_HUMAN	FOB64_005675_CANAX
ACO1_HUMAN	FOB64_005683_CANAX
ACO1_HUMAN	FOB64_005856_CANAX
ACO1_HUMAN	FOB64_005903_CANAX
ACO1_HUMAN	FOB64_005942_CANAX
ACO1_HUMAN	FOB64_005962_CANAX
ACO1_HUMAN	FOB64_006037_CANAX
ACO1_HUMAN	FOB64_006072_CANAX
ACO1_HUMAN	FOB64_006628_CANAX
ACO1_HUMAN	FOB64_006750_CANAX
ACO1_HUMAN	FOB64_006794_CANAX
ACO1_HUMAN	FOB64_006910_CANAX
ACO1_HUMAN	FOB64_006935_CANAX
ACO1_HUMAN	FOB64_006987_CANAX
ACO1_HUMAN	FOB64_007019_CANAX
ACO1_HUMAN	GFA1_CANAX
ACO1_HUMAN	GLN1_CANAX
ACO1_HUMAN	GPM1_CANAX
ACO1_HUMAN	GRX3_CANAX
ACO1_HUMAN	HAM1_CANAX
ACO1_HUMAN	IPP1_CANAX
ACO1_HUMAN	kgd2_CANAX
ACO1_HUMAN	LIA1_CANAX
ACO1_HUMAN	MES1_CANAX
ACO1_HUMAN	NAG1_CANAX
ACO1_HUMAN	NBP35_CANAX
ACO1_HUMAN	PGK1_CANAX
ACO1_HUMAN	PMM1_CANAX
ACO1_HUMAN	PRX1_CANAX
ACO1_HUMAN	QNS1_CANAX
ACO1_HUMAN	RLI1_CANAX
ACO1_HUMAN	RPB3_CANAX
ACO1_HUMAN	RPL12A_CANAX
ACO1_HUMAN	RPL23A_CANAX
ACO1_HUMAN	RPL28_CANAX
ACO1_HUMAN	RPL7A_CANAX
ACO1_HUMAN	RPS22A_CANAX
ACO1_HUMAN	RPT5_CANAX
ACO1_HUMAN	SOD1_CANAX
ACO1_HUMAN	SPS19_CANAX
ACOD1_HUMAN	Etfb_CANAX
ACOD1_HUMAN	FOB64_004262_CANAX
ACOD1_HUMAN	SDH2_CANAX
ACOT11_HUMAN	Etfb_CANAX
ACOT11_HUMAN	FOB64_001397_CANAX
ACOT11_HUMAN	FOB64_002876_CANAX
ACOT11_HUMAN	FOB64_005305_CANAX
ACOT11_HUMAN	SOD2_CANAX
ACOT12_HUMAN	ACB1_CANAX
ACOT12_HUMAN	ERG10_CANAX
ACOT12_HUMAN	SAR1_CANAX
ACOT12_HUMAN	UBI4_CANAX
ACOT12_HUMAN	URA3_CANAX
ACOT13_HUMAN	ACB1_CANAX
ACOT13_HUMAN	DUT1_CANAX
ACOT13_HUMAN	ERG10_CANAX
ACOT13_HUMAN	FOB64_000021_CANAX
ACOT13_HUMAN	FOB64_000073_CANAX
ACOT13_HUMAN	FOB64_001558_CANAX
ACOT13_HUMAN	FOB64_001976_CANAX
ACOT13_HUMAN	FOB64_002244_CANAX
ACOT13_HUMAN	FOB64_003553_CANAX
ACOT13_HUMAN	FOB64_003907_CANAX
ACOT13_HUMAN	FOB64_003949_CANAX
ACOT13_HUMAN	FOB64_003968_CANAX
ACOT13_HUMAN	FOB64_004371_CANAX
ACOT13_HUMAN	FOB64_004410_CANAX
ACOT13_HUMAN	FOB64_004505_CANAX
ACOT13_HUMAN	FOB64_005787_CANAX
ACOT13_HUMAN	FOB64_005903_CANAX
ACOT13_HUMAN	FRS1_CANAX
ACOT13_HUMAN	PGK1_CANAX
ACOT13_HUMAN	SPS19_CANAX
ACOT13_HUMAN	UBI4_CANAX
ACOT13_HUMAN	URA3_CANAX
ACOT1_HUMAN	ACB1_CANAX
ACOT1_HUMAN	ACS1_CANAX
ACOT1_HUMAN	CaJ7.0207_CANAX
ACOT1_HUMAN	DUT1_CANAX
ACOT1_HUMAN	ERG10_CANAX
ACOT1_HUMAN	FBP1_CANAX
ACOT1_HUMAN	FOB64_000845_CANAX
ACOT1_HUMAN	FOB64_001129_CANAX
ACOT1_HUMAN	FOB64_001558_CANAX
ACOT1_HUMAN	FOB64_003553_CANAX
ACOT1_HUMAN	FOB64_003907_CANAX
ACOT1_HUMAN	FOB64_003949_CANAX
ACOT1_HUMAN	FOB64_003968_CANAX
ACOT1_HUMAN	FOB64_004828_CANAX
ACOT1_HUMAN	GPM1_CANAX
ACOT1_HUMAN	SPS19_CANAX
ACOT1_HUMAN	UBI4_CANAX
ACOT7_HUMAN	AAT2_CANAX
ACOT7_HUMAN	ACB1_CANAX
ACOT7_HUMAN	ACS1_CANAX
ACOT7_HUMAN	ADK1_CANAX
ACOT7_HUMAN	ADK2_CANAX
ACOT7_HUMAN	AGM1_CANAX
ACOT7_HUMAN	CaJ7.0207_CANAX
ACOT7_HUMAN	cdc22_CANAX
ACOT7_HUMAN	FOB64_000021_CANAX
ACOT7_HUMAN	FOB64_000194_CANAX
ACOT7_HUMAN	FOB64_000251_CANAX
ACOT7_HUMAN	FOB64_000682_CANAX
ACOT7_HUMAN	FOB64_000843_CANAX
ACOT7_HUMAN	FOB64_001558_CANAX
ACOT7_HUMAN	FOB64_001732_CANAX
ACOT7_HUMAN	FOB64_002235_CANAX
ACOT7_HUMAN	FOB64_002459_CANAX
ACOT7_HUMAN	FOB64_002507_CANAX
ACOT7_HUMAN	FOB64_003266_CANAX
ACOT7_HUMAN	FOB64_003657_CANAX
ACOT7_HUMAN	FOB64_003855_CANAX
ACOT7_HUMAN	FOB64_003907_CANAX
ACOT7_HUMAN	FOB64_003949_CANAX
ACOT7_HUMAN	FOB64_003968_CANAX
ACOT7_HUMAN	FOB64_004263_CANAX
ACOT7_HUMAN	FOB64_004828_CANAX
ACOT7_HUMAN	FOB64_005014_CANAX
ACOT7_HUMAN	FOB64_005017_CANAX
ACOT7_HUMAN	FOB64_005107_CANAX
ACOT7_HUMAN	FOB64_005244_CANAX
ACOT7_HUMAN	FOB64_005787_CANAX
ACOT7_HUMAN	FOB64_005903_CANAX
ACOT7_HUMAN	FOB64_005962_CANAX
ACOT7_HUMAN	FOB64_006696_CANAX
ACOT7_HUMAN	FOB64_006750_CANAX
ACOT7_HUMAN	FOB64_006987_CANAX
ACOT7_HUMAN	GPM1_CANAX
ACOT7_HUMAN	HSP82_CANAX
ACOT7_HUMAN	INO1_CANAX
ACOT7_HUMAN	IPP1_CANAX
ACOT7_HUMAN	MCM5_CANAX
ACOT7_HUMAN	NAG1_CANAX
ACOT7_HUMAN	OLA1_CANAX
ACOT7_HUMAN	PGK1_CANAX
ACOT7_HUMAN	PRE1_CANAX
ACOT7_HUMAN	PRX1_CANAX
ACOT7_HUMAN	RBP2_CANAX
ACOT7_HUMAN	RLI1_CANAX
ACOT7_HUMAN	RPL15B_CANAX
ACOT7_HUMAN	RPS4A_CANAX
ACOT7_HUMAN	RPT5_CANAX
ACOT7_HUMAN	SAR1_CANAX
ACOT7_HUMAN	SOD1_CANAX
ACOT7_HUMAN	TEF1a_CANAX
ACOT7_HUMAN	TMA20_CANAX
ACOT7_HUMAN	TUB1_CANAX
ACOT9_HUMAN	Etfb_CANAX
ACOT9_HUMAN	FOB64_002876_CANAX
ACOT9_HUMAN	FOB64_005305_CANAX
ACOT9_HUMAN	SOD2_CANAX
ACP6_HUMAN	LSC2_CANAX
ACP6_HUMAN	SOD2_CANAX
ACRV1_HUMAN	PGK1_CANAX
ACSBG1_HUMAN	ACB1_CANAX
ACSBG1_HUMAN	ACS1_CANAX
ACSBG1_HUMAN	CaJ7.0207_CANAX
ACSBG1_HUMAN	ERG10_CANAX
ACSBG1_HUMAN	FOB64_000845_CANAX
ACSBG1_HUMAN	FOB64_001558_CANAX
ACSBG1_HUMAN	FOB64_001976_CANAX
ACSBG1_HUMAN	FOB64_003968_CANAX
ACSBG1_HUMAN	FOB64_004505_CANAX
ACSBG1_HUMAN	FOB64_006072_CANAX
ACSBG1_HUMAN	FRS1_CANAX
ACSBG1_HUMAN	SPS19_CANAX
ACSBG1_HUMAN	UBI4_CANAX
ACSBG2_HUMAN	ACB1_CANAX
ACSBG2_HUMAN	ERG10_CANAX
ACSBG2_HUMAN	FRS1_CANAX
ACSBG2_HUMAN	TUB1_CANAX
ACSBG2_HUMAN	UBI4_CANAX
ACSF2_HUMAN	Etfb_CANAX
ACSF2_HUMAN	FOB64_002876_CANAX
ACSF2_HUMAN	FOB64_004262_CANAX
ACSF2_HUMAN	FOB64_005305_CANAX
ACSF2_HUMAN	FOB64_006074_CANAX
ACSF2_HUMAN	LSC2_CANAX
ACSF2_HUMAN	SDH2_CANAX
ACSF2_HUMAN	SOD2_CANAX
ACSF2_HUMAN	SUCLG1_CANAX
ACSF3_HUMAN	Etfb_CANAX
ACSF3_HUMAN	FOB64_000777_CANAX
ACSF3_HUMAN	FOB64_002876_CANAX
ACSF3_HUMAN	FOB64_004262_CANAX
ACSF3_HUMAN	FOB64_005305_CANAX
ACSF3_HUMAN	FOB64_006074_CANAX
ACSF3_HUMAN	FOB64_006286_CANAX
ACSF3_HUMAN	LSC2_CANAX
ACSF3_HUMAN	SDH2_CANAX
ACSF3_HUMAN	SOD2_CANAX
ACSF3_HUMAN	SUCLG1_CANAX
ACSL1_HUMAN	Etfb_CANAX
ACSL1_HUMAN	FOB64_001397_CANAX
ACSL1_HUMAN	FOB64_002876_CANAX
ACSL1_HUMAN	FOB64_004262_CANAX
ACSL1_HUMAN	FOB64_005305_CANAX
ACSL1_HUMAN	FOB64_006286_CANAX
ACSL1_HUMAN	SDH2_CANAX
ACSL1_HUMAN	SOD2_CANAX
ACSL1_HUMAN	SUCLG1_CANAX
ACSL3_HUMAN	FOB64_000777_CANAX
ACSL3_HUMAN	FOB64_001397_CANAX
ACSL3_HUMAN	FOB64_004262_CANAX
ACSL3_HUMAN	FOB64_005305_CANAX
ACSL3_HUMAN	FOB64_006286_CANAX
ACSL3_HUMAN	MAE1_CANAX
ACSL4_HUMAN	FOB64_001397_CANAX
ACSL4_HUMAN	FOB64_004262_CANAX
ACSL4_HUMAN	FOB64_005305_CANAX
ACSL4_HUMAN	FOB64_006771_CANAX
ACSL5_HUMAN	FOB64_001397_CANAX
ACSL5_HUMAN	FOB64_004262_CANAX
ACSL5_HUMAN	FOB64_006286_CANAX
ACSL5_HUMAN	MAE1_CANAX
ACSL5_HUMAN	SOD2_CANAX
ACSL5_HUMAN	SUCLG1_CANAX
ACSM1_HUMAN	ALD5_CANAX
ACSM1_HUMAN	FOB64_004262_CANAX
ACSM1_HUMAN	LSC2_CANAX
ACSM1_HUMAN	MAE1_CANAX
ACSM1_HUMAN	SDH2_CANAX
ACSM1_HUMAN	SUCLG1_CANAX
ACSM2A_HUMAN	LSC2_CANAX
ACSM2A_HUMAN	MAE1_CANAX
ACSM2A_HUMAN	SDH2_CANAX
ACSM2A_HUMAN	SOD2_CANAX
ACSM2B_HUMAN	LSC2_CANAX
ACSM2B_HUMAN	MAE1_CANAX
ACSM2B_HUMAN	SDH2_CANAX
ACSM3_HUMAN	LSC2_CANAX
ACSM3_HUMAN	MAE1_CANAX
ACSM3_HUMAN	SDH2_CANAX
ACSM4_HUMAN	LSC2_CANAX
ACSM4_HUMAN	MAE1_CANAX
ACSM4_HUMAN	SDH2_CANAX
ACSM5_HUMAN	LSC2_CANAX
ACSM5_HUMAN	MAE1_CANAX
ACSM5_HUMAN	SDH2_CANAX
ACSS3_HUMAN	LSC2_CANAX
ACSS3_HUMAN	MAE1_CANAX
ACSS3_HUMAN	SDH2_CANAX
ACSS3_HUMAN	SOD2_CANAX
ACTL6A_HUMAN	CDC21_CANAX
ACTL6A_HUMAN	HAS1_CANAX
ACTL6A_HUMAN	NIP7_CANAX
ACTL6A_HUMAN	NOG1_CANAX
ACTL6A_HUMAN	NTF2_CANAX
ACTL6A_HUMAN	PPH3_CANAX
ACTL6A_HUMAN	RVB2_CANAX
ACTL6A_HUMAN	SEC26_CANAX
ACTL6A_HUMAN	SRP54_CANAX
ACTL6A_HUMAN	TOP2_CANAX
ACTL6B_HUMAN	NOG1_CANAX
ACTL6B_HUMAN	PPH3_CANAX
ACTL6B_HUMAN	RVB2_CANAX
ACTL6B_HUMAN	TOP2_CANAX
ACTL8_HUMAN	ACB1_CANAX
ACTL8_HUMAN	EFT2_CANAX
ACTL8_HUMAN	IMH3_CANAX
ACTL8_HUMAN	PGK1_CANAX
ACTL8_HUMAN	TUB1_CANAX
ACTL8_HUMAN	UBI4_CANAX
ACTL8_HUMAN	URA3_CANAX
ACTN1_HUMAN	ctp_CANAX
ACTN1_HUMAN	EFT2_CANAX
ACTN1_HUMAN	FBP1_CANAX
ACTN1_HUMAN	FOB64_000021_CANAX
ACTN1_HUMAN	FOB64_000215_CANAX
ACTN1_HUMAN	FOB64_000251_CANAX
ACTN1_HUMAN	FOB64_000845_CANAX
ACTN1_HUMAN	FOB64_001558_CANAX
ACTN1_HUMAN	FOB64_003553_CANAX
ACTN1_HUMAN	FOB64_003968_CANAX
ACTN1_HUMAN	FOB64_004345_CANAX
ACTN1_HUMAN	FOB64_005675_CANAX
ACTN1_HUMAN	FOB64_005903_CANAX
ACTN1_HUMAN	FOB64_006072_CANAX
ACTN1_HUMAN	FOB64_006182_CANAX
ACTN1_HUMAN	FOB64_006756_CANAX
ACTN1_HUMAN	GUK1_CANAX
ACTN1_HUMAN	PGK1_CANAX
ACTN1_HUMAN	SAR1_CANAX
ACTN1_HUMAN	TUB1_CANAX
ACTN1_HUMAN	UBI4_CANAX
ACTN1_HUMAN	YDJ1_CANAX
ACTN2_HUMAN	CaJ7.0207_CANAX
ACTN2_HUMAN	EFT2_CANAX
ACTN2_HUMAN	FBP1_CANAX
ACTN2_HUMAN	FOB64_000215_CANAX
ACTN2_HUMAN	FOB64_001558_CANAX
ACTN2_HUMAN	FOB64_001976_CANAX
ACTN2_HUMAN	FOB64_003553_CANAX
ACTN2_HUMAN	FOB64_004345_CANAX
ACTN2_HUMAN	FOB64_005584_CANAX
ACTN2_HUMAN	FOB64_005903_CANAX
ACTN2_HUMAN	FOB64_006732_CANAX
ACTN2_HUMAN	FOB64_006756_CANAX
ACTN2_HUMAN	SAR1_CANAX
ACTN2_HUMAN	TUB1_CANAX
ACTN2_HUMAN	UBI4_CANAX
ACTN2_HUMAN	YDJ1_CANAX
ACTN4_HUMAN	GCN5_CANAX
ACTN4_HUMAN	HTA1_CANAX
ACTN4_HUMAN	NTF2_CANAX
ACTN4_HUMAN	PHO85_CANAX
ACTN4_HUMAN	PPH3_CANAX
ACTN4_HUMAN	RPS12_CANAX
ACTN4_HUMAN	RVB2_CANAX
ACTN4_HUMAN	SMT3_CANAX
ACTN4_HUMAN	SNF1_CANAX
ACTN4_HUMAN	VPS4_CANAX
ACTR10_HUMAN	ACB1_CANAX
ACTR10_HUMAN	CDC3_CANAX
ACTR10_HUMAN	ctp_CANAX
ACTR10_HUMAN	EFT2_CANAX
ACTR10_HUMAN	FOB64_000215_CANAX
ACTR10_HUMAN	FOB64_000251_CANAX
ACTR10_HUMAN	FOB64_000545_CANAX
ACTR10_HUMAN	FOB64_001293_CANAX
ACTR10_HUMAN	FOB64_001558_CANAX
ACTR10_HUMAN	FOB64_004041_CANAX
ACTR10_HUMAN	FOB64_004263_CANAX
ACTR10_HUMAN	FOB64_004828_CANAX
ACTR10_HUMAN	FOB64_005313_CANAX
ACTR10_HUMAN	FOB64_005675_CANAX
ACTR10_HUMAN	FOB64_005856_CANAX
ACTR10_HUMAN	FOB64_006072_CANAX
ACTR10_HUMAN	FOB64_006182_CANAX
ACTR10_HUMAN	FOB64_006628_CANAX
ACTR10_HUMAN	FOB64_006756_CANAX
ACTR10_HUMAN	FRS1_CANAX
ACTR10_HUMAN	GCD11_CANAX
ACTR10_HUMAN	IMH3_CANAX
ACTR10_HUMAN	PGK1_CANAX
ACTR10_HUMAN	SOD1_CANAX
ACTR10_HUMAN	TUB1_CANAX
ACTR10_HUMAN	UBI4_CANAX
ACTR10_HUMAN	URA3_CANAX
ACTR5_HUMAN	RVB2_CANAX
ACTR5_HUMAN	SNF1_CANAX
ACTR5_HUMAN	TOP2_CANAX
ACTR6_HUMAN	ACB1_CANAX
ACTR6_HUMAN	TUB1_CANAX
ACTR6_HUMAN	UBI4_CANAX
ACTR8_HUMAN	HAS1_CANAX
ACTR8_HUMAN	PPH3_CANAX
ACTR8_HUMAN	RVB2_CANAX
ACTR8_HUMAN	SNF1_CANAX
ACTR8_HUMAN	SRP54_CANAX
ACTR8_HUMAN	TOP2_CANAX
ACY1_HUMAN	ACS1_CANAX
ACY1_HUMAN	ADK2_CANAX
ACY1_HUMAN	ERG10_CANAX
ACY1_HUMAN	FBP1_CANAX
ACY1_HUMAN	FOB64_000021_CANAX
ACY1_HUMAN	FOB64_001558_CANAX
ACY1_HUMAN	FOB64_002244_CANAX
ACY1_HUMAN	FOB64_003907_CANAX
ACY1_HUMAN	FOB64_003949_CANAX
ACY1_HUMAN	FOB64_003968_CANAX
ACY1_HUMAN	FOB64_004140_CANAX
ACY1_HUMAN	FOB64_004371_CANAX
ACY1_HUMAN	FOB64_004410_CANAX
ACY1_HUMAN	FOB64_005415_CANAX
ACY1_HUMAN	FOB64_005584_CANAX
ACY1_HUMAN	FOB64_005613_CANAX
ACY1_HUMAN	FOB64_005856_CANAX
ACY1_HUMAN	FOB64_005903_CANAX
ACY1_HUMAN	FOB64_006640_CANAX
ACY1_HUMAN	FOB64_006910_CANAX
ACY1_HUMAN	FOB64_006929_CANAX
ACY1_HUMAN	GFA1_CANAX
ACY1_HUMAN	GUK1_CANAX
ACY1_HUMAN	HAM1_CANAX
ACY1_HUMAN	IPP1_CANAX
ACY1_HUMAN	MAP2_CANAX
ACY1_HUMAN	RPL9B_CANAX
ACY1_HUMAN	SOD1_CANAX
ACY1_HUMAN	SPS19_CANAX
ACY1_HUMAN	UBI4_CANAX
ACY1_HUMAN	URA3_CANAX
ADAD2_HUMAN	DIS3_CANAX
ADAP1_HUMAN	FOB64_000606_CANAX
ADAP1_HUMAN	FOB64_003032_CANAX
ADAP1_HUMAN	FOB64_005765_CANAX
ADAP1_HUMAN	FOB64_005814_CANAX
ADAP1_HUMAN	MCM4_CANAX
ADAP1_HUMAN	NHP6_CANAX
ADAP1_HUMAN	PPH3_CANAX
ADAP1_HUMAN	SEC26_CANAX
ADAP2_HUMAN	FOB64_000215_CANAX
ADAP2_HUMAN	FOB64_003661_CANAX
ADAP2_HUMAN	IPP1_CANAX
ADAP2_HUMAN	TUB1_CANAX
ADARB1_HUMAN	NIP7_CANAX
ADARB1_HUMAN	NOG1_CANAX
ADARB1_HUMAN	RVB2_CANAX
ADAR_HUMAN	APS3_CANAX
ADAR_HUMAN	ASC1_CANAX
ADAR_HUMAN	cdc22_CANAX
ADAR_HUMAN	CRM1_CANAX
ADAR_HUMAN	FOB64_000215_CANAX
ADAR_HUMAN	FOB64_000591_CANAX
ADAR_HUMAN	FOB64_001558_CANAX
ADAR_HUMAN	FOB64_002235_CANAX
ADAR_HUMAN	FOB64_002507_CANAX
ADAR_HUMAN	FOB64_002697_CANAX
ADAR_HUMAN	FOB64_003553_CANAX
ADAR_HUMAN	FOB64_003625_CANAX
ADAR_HUMAN	FOB64_003657_CANAX
ADAR_HUMAN	FOB64_004828_CANAX
ADAR_HUMAN	FOB64_004930_CANAX
ADAR_HUMAN	FOB64_005415_CANAX
ADAR_HUMAN	FOB64_006037_CANAX
ADAR_HUMAN	FOB64_006182_CANAX
ADAR_HUMAN	FOB64_006219_CANAX
ADAR_HUMAN	FOB64_006732_CANAX
ADAR_HUMAN	FOB64_006967_CANAX
ADAR_HUMAN	FOB64_006987_CANAX
ADAR_HUMAN	PRE1_CANAX
ADAR_HUMAN	RLI1_CANAX
ADAR_HUMAN	RPL42B_CANAX
ADAR_HUMAN	RPS4A_CANAX
ADAR_HUMAN	smd2_CANAX
ADAR_HUMAN	SMD3_CANAX
ADAR_HUMAN	TEF1a_CANAX
ADAR_HUMAN	TRM7_CANAX
ADAR_HUMAN	TUB1_CANAX
ADAR_HUMAN	WRS1_CANAX
ADD1_HUMAN	FBP1_CANAX
ADD1_HUMAN	FOB64_000021_CANAX
ADD1_HUMAN	FOB64_001558_CANAX
ADD1_HUMAN	FOB64_002244_CANAX
ADD1_HUMAN	FOB64_003553_CANAX
ADD1_HUMAN	FOB64_003968_CANAX
ADD1_HUMAN	FOB64_005276_CANAX
ADD1_HUMAN	FOB64_005415_CANAX
ADD1_HUMAN	FOB64_005675_CANAX
ADD1_HUMAN	FOB64_005856_CANAX
ADD1_HUMAN	FOB64_005962_CANAX
ADD1_HUMAN	FOB64_006219_CANAX
ADD1_HUMAN	GUK1_CANAX
ADD1_HUMAN	HAM1_CANAX
ADD1_HUMAN	SOD1_CANAX
ADD1_HUMAN	TUB1_CANAX
ADD1_HUMAN	UBI4_CANAX
ADD2_HUMAN	FBP1_CANAX
ADD2_HUMAN	GUK1_CANAX
ADD2_HUMAN	HAM1_CANAX
ADD2_HUMAN	TUB1_CANAX
ADD2_HUMAN	UBI4_CANAX
ADD3_HUMAN	CaJ7.0207_CANAX
ADD3_HUMAN	CDC3_CANAX
ADD3_HUMAN	FBP1_CANAX
ADD3_HUMAN	FOB64_000021_CANAX
ADD3_HUMAN	FOB64_000215_CANAX
ADD3_HUMAN	FOB64_000280_CANAX
ADD3_HUMAN	FOB64_000614_CANAX
ADD3_HUMAN	FOB64_000843_CANAX
ADD3_HUMAN	FOB64_001380_CANAX
ADD3_HUMAN	FOB64_001558_CANAX
ADD3_HUMAN	FOB64_001589_CANAX
ADD3_HUMAN	FOB64_002146_CANAX
ADD3_HUMAN	FOB64_002244_CANAX
ADD3_HUMAN	FOB64_003200_CANAX
ADD3_HUMAN	FOB64_003553_CANAX
ADD3_HUMAN	FOB64_003968_CANAX
ADD3_HUMAN	FOB64_004742_CANAX
ADD3_HUMAN	FOB64_005276_CANAX
ADD3_HUMAN	FOB64_005415_CANAX
ADD3_HUMAN	FOB64_005502_CANAX
ADD3_HUMAN	FOB64_005856_CANAX
ADD3_HUMAN	FOB64_005962_CANAX
ADD3_HUMAN	FOB64_005970_CANAX
ADD3_HUMAN	FOB64_006219_CANAX
ADD3_HUMAN	FOB64_006696_CANAX
ADD3_HUMAN	FOB64_006732_CANAX
ADD3_HUMAN	FOB64_006794_CANAX
ADD3_HUMAN	FOB64_006910_CANAX
ADD3_HUMAN	GUK1_CANAX
ADD3_HUMAN	HAM1_CANAX
ADD3_HUMAN	MES1_CANAX
ADD3_HUMAN	MRI1_CANAX
ADD3_HUMAN	TUB1_CANAX
ADD3_HUMAN	UBI4_CANAX
ADHFE1_HUMAN	LSC2_CANAX
ADHFE1_HUMAN	SDH2_CANAX
ADHFE1_HUMAN	SOD2_CANAX
ADI1_HUMAN	EFT2_CANAX
ADI1_HUMAN	FOB64_000021_CANAX
ADI1_HUMAN	FOB64_001854_CANAX
ADI1_HUMAN	FOB64_003625_CANAX
ADI1_HUMAN	FOB64_004828_CANAX
ADI1_HUMAN	FOB64_005276_CANAX
ADI1_HUMAN	FOB64_005613_CANAX
ADI1_HUMAN	FOB64_006640_CANAX
ADI1_HUMAN	FOB64_006910_CANAX
ADI1_HUMAN	FOB64_007019_CANAX
ADI1_HUMAN	GFA1_CANAX
ADI1_HUMAN	MDE1_CANAX
ADI1_HUMAN	MET14_CANAX
ADI1_HUMAN	OLA1_CANAX
ADI1_HUMAN	PGK1_CANAX
ADI1_HUMAN	SPS19_CANAX
ADI1_HUMAN	TUB1_CANAX
ADK_HUMAN	CDC21_CANAX
ADK_HUMAN	PPH3_CANAX
ADK_HUMAN	RPA135_CANAX
ADK_HUMAN	SNF1_CANAX
ADK_HUMAN	VPS4_CANAX
ADNP2_HUMAN	DIB1_CANAX
ADNP2_HUMAN	RPA135_CANAX
ADNP_HUMAN	FOB64_000606_CANAX
ADNP_HUMAN	FOB64_004607_CANAX
ADNP_HUMAN	FOB64_005814_CANAX
ADNP_HUMAN	FOB64_006022_CANAX
ADNP_HUMAN	MCM4_CANAX
ADNP_HUMAN	NHP6_CANAX
ADNP_HUMAN	PPH3_CANAX
ADNP_HUMAN	RPB2_CANAX
ADPRHL1_HUMAN	FBP1_CANAX
ADRM1_HUMAN	ALA1_CANAX
ADRM1_HUMAN	ard1_CANAX
ADRM1_HUMAN	ASC1_CANAX
ADRM1_HUMAN	CDC12_CANAX
ADRM1_HUMAN	CFD1_CANAX
ADRM1_HUMAN	CRM1_CANAX
ADRM1_HUMAN	DID2_CANAX
ADRM1_HUMAN	DPH1_CANAX
ADRM1_HUMAN	EFT2_CANAX
ADRM1_HUMAN	FOB64_000073_CANAX
ADRM1_HUMAN	FOB64_000215_CANAX
ADRM1_HUMAN	FOB64_000280_CANAX
ADRM1_HUMAN	FOB64_000307_CANAX
ADRM1_HUMAN	FOB64_000545_CANAX
ADRM1_HUMAN	FOB64_000688_CANAX
ADRM1_HUMAN	FOB64_000902_CANAX
ADRM1_HUMAN	FOB64_001293_CANAX
ADRM1_HUMAN	FOB64_001404_CANAX
ADRM1_HUMAN	FOB64_001558_CANAX
ADRM1_HUMAN	FOB64_001562_CANAX
ADRM1_HUMAN	FOB64_002215_CANAX
ADRM1_HUMAN	FOB64_002221_CANAX
ADRM1_HUMAN	FOB64_002459_CANAX
ADRM1_HUMAN	FOB64_002507_CANAX
ADRM1_HUMAN	FOB64_002636_CANAX
ADRM1_HUMAN	FOB64_002697_CANAX
ADRM1_HUMAN	FOB64_003625_CANAX
ADRM1_HUMAN	FOB64_003657_CANAX
ADRM1_HUMAN	FOB64_004041_CANAX
ADRM1_HUMAN	FOB64_004177_CANAX
ADRM1_HUMAN	FOB64_004345_CANAX
ADRM1_HUMAN	FOB64_004410_CANAX
ADRM1_HUMAN	FOB64_004898_CANAX
ADRM1_HUMAN	FOB64_005017_CANAX
ADRM1_HUMAN	FOB64_005107_CANAX
ADRM1_HUMAN	FOB64_005152_CANAX
ADRM1_HUMAN	FOB64_005244_CANAX
ADRM1_HUMAN	FOB64_005276_CANAX
ADRM1_HUMAN	FOB64_005311_CANAX
ADRM1_HUMAN	FOB64_005415_CANAX
ADRM1_HUMAN	FOB64_005487_CANAX
ADRM1_HUMAN	FOB64_005494_CANAX
ADRM1_HUMAN	FOB64_005584_CANAX
ADRM1_HUMAN	FOB64_005673_CANAX
ADRM1_HUMAN	FOB64_005675_CANAX
ADRM1_HUMAN	FOB64_005787_CANAX
ADRM1_HUMAN	FOB64_005903_CANAX
ADRM1_HUMAN	FOB64_005919_CANAX
ADRM1_HUMAN	FOB64_005942_CANAX
ADRM1_HUMAN	FOB64_005962_CANAX
ADRM1_HUMAN	FOB64_006094_CANAX
ADRM1_HUMAN	FOB64_006182_CANAX
ADRM1_HUMAN	FOB64_006219_CANAX
ADRM1_HUMAN	FOB64_006628_CANAX
ADRM1_HUMAN	FOB64_006750_CANAX
ADRM1_HUMAN	FOB64_006768_CANAX
ADRM1_HUMAN	FOB64_006910_CANAX
ADRM1_HUMAN	FOB64_006967_CANAX
ADRM1_HUMAN	FOB64_006987_CANAX
ADRM1_HUMAN	FRS1_CANAX
ADRM1_HUMAN	GCD11_CANAX
ADRM1_HUMAN	HSP82_CANAX
ADRM1_HUMAN	IMH3_CANAX
ADRM1_HUMAN	IPP1_CANAX
ADRM1_HUMAN	LIA1_CANAX
ADRM1_HUMAN	MCM5_CANAX
ADRM1_HUMAN	MES1_CANAX
ADRM1_HUMAN	NAT3_CANAX
ADRM1_HUMAN	PRE1_CANAX
ADRM1_HUMAN	PUP1_CANAX
ADRM1_HUMAN	RBP2_CANAX
ADRM1_HUMAN	RLI1_CANAX
ADRM1_HUMAN	RPL12A_CANAX
ADRM1_HUMAN	RPL15B_CANAX
ADRM1_HUMAN	rpl16_CANAX
ADRM1_HUMAN	RPL18A_CANAX
ADRM1_HUMAN	RPL19B_CANAX
ADRM1_HUMAN	RPL20B_CANAX
ADRM1_HUMAN	RPL23A_CANAX
ADRM1_HUMAN	RPL28_CANAX
ADRM1_HUMAN	RPL5_CANAX
ADRM1_HUMAN	RPL7A_CANAX
ADRM1_HUMAN	RPL8B_CANAX
ADRM1_HUMAN	RPL9B_CANAX
ADRM1_HUMAN	RPN11_CANAX
ADRM1_HUMAN	RPS0_CANAX
ADRM1_HUMAN	RPS10A_CANAX
ADRM1_HUMAN	RPS19A_CANAX
ADRM1_HUMAN	RPS1_CANAX
ADRM1_HUMAN	RPS21_CANAX
ADRM1_HUMAN	RPS22A_CANAX
ADRM1_HUMAN	RPS24B_CANAX
ADRM1_HUMAN	RPS26A_CANAX
ADRM1_HUMAN	RPS28B_CANAX
ADRM1_HUMAN	RPS4A_CANAX
ADRM1_HUMAN	RPT5_CANAX
ADRM1_HUMAN	SEC18_CANAX
ADRM1_HUMAN	smd2_CANAX
ADRM1_HUMAN	SOD1_CANAX
ADRM1_HUMAN	TEF1a_CANAX
ADRM1_HUMAN	TMA20_CANAX
ADRM1_HUMAN	TUB1_CANAX
ADRM1_HUMAN	UBI4_CANAX
ADRM1_HUMAN	WRS1_CANAX
AEBP2_HUMAN	FOB64_005814_CANAX
AEBP2_HUMAN	FOB64_006022_CANAX
AEN_HUMAN	CBF5_CANAX
AEN_HUMAN	CDC21_CANAX
AEN_HUMAN	DIS3_CANAX
AEN_HUMAN	FOB64_000606_CANAX
AEN_HUMAN	FOB64_002335_CANAX
AEN_HUMAN	FOB64_002635_CANAX
AEN_HUMAN	FOB64_004386_CANAX
AEN_HUMAN	FOB64_005598_CANAX
AEN_HUMAN	FOB64_006393_CANAX
AEN_HUMAN	HAS1_CANAX
AEN_HUMAN	KRR1_CANAX
AEN_HUMAN	NAT10_CANAX
AEN_HUMAN	NIP7_CANAX
AEN_HUMAN	NOG1_CANAX
AEN_HUMAN	RPA135_CANAX
AEN_HUMAN	RPB2_CANAX
AEN_HUMAN	RPB5_CANAX
AEN_HUMAN	TOP2_CANAX
AFAP1_HUMAN	FOB64_001558_CANAX
AFAP1L1_HUMAN	TUB1_CANAX
AFAP1L2_HUMAN	FOB64_001976_CANAX
AFAP1L2_HUMAN	MET14_CANAX
AFAP1L2_HUMAN	RPL20B_CANAX
AFF1_HUMAN	FOB64_006940_CANAX
AFF1_HUMAN	NRPB1_CANAX
AFF4_HUMAN	FOB64_005814_CANAX
AFF4_HUMAN	FOB64_006940_CANAX
AFF4_HUMAN	NHP6_CANAX
AFF4_HUMAN	PPH3_CANAX
AFF4_HUMAN	RAD3_CANAX
AFF4_HUMAN	RPB2_CANAX
AFF4_HUMAN	RPB5_CANAX
AFF4_HUMAN	RVB2_CANAX
AFG1L_HUMAN	LSC2_CANAX
AFG1L_HUMAN	SDH2_CANAX
AFG2B_HUMAN	FBP1_CANAX
AFG2B_HUMAN	PRE1_CANAX
AFG2B_HUMAN	RPL9B_CANAX
AFG2B_HUMAN	UBI4_CANAX
AFG2B_HUMAN	YDJ1_CANAX
AFMID_HUMAN	ACB1_CANAX
AFMID_HUMAN	FOB64_001129_CANAX
AFMID_HUMAN	FOB64_002244_CANAX
AFMID_HUMAN	FOB64_003907_CANAX
AFMID_HUMAN	FOB64_003968_CANAX
AFMID_HUMAN	FOB64_004371_CANAX
AFMID_HUMAN	FOB64_005584_CANAX
AFMID_HUMAN	FOB64_005606_CANAX
AFMID_HUMAN	FOB64_005962_CANAX
AFMID_HUMAN	FOB64_005970_CANAX
AFMID_HUMAN	QNS1_CANAX
AGAP1_HUMAN	APS3_CANAX
AGAP1_HUMAN	CDC3_CANAX
AGAP1_HUMAN	SAR1_CANAX
AGAP1_HUMAN	TUB1_CANAX
AGAP2_HUMAN	APS3_CANAX
AGAP2_HUMAN	SAR1_CANAX
AGAP2_HUMAN	TUB1_CANAX
AGAP3_HUMAN	ADK2_CANAX
AGAP3_HUMAN	APS3_CANAX
AGAP3_HUMAN	CDC3_CANAX
AGAP3_HUMAN	FOB64_000215_CANAX
AGAP3_HUMAN	FOB64_000251_CANAX
AGAP3_HUMAN	FOB64_006182_CANAX
AGAP3_HUMAN	FOB64_006910_CANAX
AGAP3_HUMAN	OLA1_CANAX
AGAP3_HUMAN	TUB1_CANAX
AGAP3_HUMAN	UBI4_CANAX
AGBL1_HUMAN	APS3_CANAX
AGBL1_HUMAN	IMH3_CANAX
AGBL1_HUMAN	TUB1_CANAX
AGBL2_HUMAN	MES1_CANAX
AGBL2_HUMAN	TUB1_CANAX
AGBL3_HUMAN	FOB64_003625_CANAX
AGBL3_HUMAN	FOB64_005675_CANAX
AGBL3_HUMAN	FOB64_005903_CANAX
AGBL4_HUMAN	TUB1_CANAX
AGBL5_HUMAN	TUB1_CANAX
AGFG1_HUMAN	FOB64_000606_CANAX
AGFG1_HUMAN	FOB64_005765_CANAX
AGFG1_HUMAN	FOB64_005814_CANAX
AGFG1_HUMAN	FOB64_006940_CANAX
AGFG1_HUMAN	NHP6_CANAX
AGFG1_HUMAN	NOG1_CANAX
AGFG1_HUMAN	NTF2_CANAX
AGFG1_HUMAN	PPH3_CANAX
AGFG1_HUMAN	SEC26_CANAX
AGFG1_HUMAN	VPS4_CANAX
AGGF1_HUMAN	MET14_CANAX
AGGF1_HUMAN	TUB1_CANAX
AGL_HUMAN	CDC3_CANAX
AGL_HUMAN	CRM1_CANAX
AGL_HUMAN	FBP1_CANAX
AGL_HUMAN	GPM1_CANAX
AGL_HUMAN	MET14_CANAX
AGL_HUMAN	PGK1_CANAX
AGL_HUMAN	TPK2_CANAX
AGL_HUMAN	YDJ1_CANAX
AGMAT_HUMAN	ALD5_CANAX
AGMO_HUMAN	ERG9_CANAX
AGO1_HUMAN	DUT1_CANAX
AGO1_HUMAN	EFT2_CANAX
AGO1_HUMAN	FOB64_001293_CANAX
AGO1_HUMAN	FOB64_001558_CANAX
AGO1_HUMAN	FOB64_003553_CANAX
AGO1_HUMAN	FOB64_003625_CANAX
AGO1_HUMAN	FOB64_004345_CANAX
AGO1_HUMAN	FOB64_004828_CANAX
AGO1_HUMAN	FOB64_005415_CANAX
AGO1_HUMAN	FOB64_005675_CANAX
AGO1_HUMAN	FOB64_005856_CANAX
AGO1_HUMAN	FOB64_006182_CANAX
AGO1_HUMAN	FOB64_006628_CANAX
AGO1_HUMAN	FOB64_006640_CANAX
AGO1_HUMAN	FOB64_006910_CANAX
AGO1_HUMAN	RPL20B_CANAX
AGO1_HUMAN	RPL7A_CANAX
AGO1_HUMAN	RPS22A_CANAX
AGO1_HUMAN	UBI4_CANAX
AGO1_HUMAN	URA3_CANAX
AGO1_HUMAN	YDJ1_CANAX
AGO2_HUMAN	CaJ7.0207_CANAX
AGO2_HUMAN	DUT1_CANAX
AGO2_HUMAN	EFT2_CANAX
AGO2_HUMAN	FOB64_000215_CANAX
AGO2_HUMAN	FOB64_001293_CANAX
AGO2_HUMAN	FOB64_001558_CANAX
AGO2_HUMAN	FOB64_001976_CANAX
AGO2_HUMAN	FOB64_003553_CANAX
AGO2_HUMAN	FOB64_003625_CANAX
AGO2_HUMAN	FOB64_003949_CANAX
AGO2_HUMAN	FOB64_004041_CANAX
AGO2_HUMAN	FOB64_004345_CANAX
AGO2_HUMAN	FOB64_004828_CANAX
AGO2_HUMAN	FOB64_005064_CANAX
AGO2_HUMAN	FOB64_005313_CANAX
AGO2_HUMAN	FOB64_005415_CANAX
AGO2_HUMAN	FOB64_005675_CANAX
AGO2_HUMAN	FOB64_005856_CANAX
AGO2_HUMAN	FOB64_005903_CANAX
AGO2_HUMAN	FOB64_005942_CANAX
AGO2_HUMAN	FOB64_006182_CANAX
AGO2_HUMAN	FOB64_006628_CANAX
AGO2_HUMAN	FOB64_006640_CANAX
AGO2_HUMAN	FOB64_006910_CANAX
AGO2_HUMAN	RPL20B_CANAX
AGO2_HUMAN	RPL33A_CANAX
AGO2_HUMAN	RPL7A_CANAX
AGO2_HUMAN	RPL9B_CANAX
AGO2_HUMAN	RPS22A_CANAX
AGO2_HUMAN	SOD1_CANAX
AGO2_HUMAN	TUB1_CANAX
AGO2_HUMAN	UBI4_CANAX
AGO2_HUMAN	URA3_CANAX
AGO2_HUMAN	YDJ1_CANAX
AGO3_HUMAN	ACB1_CANAX
AGO3_HUMAN	APS3_CANAX
AGO3_HUMAN	ASC1_CANAX
AGO3_HUMAN	CRM1_CANAX
AGO3_HUMAN	DUT1_CANAX
AGO3_HUMAN	EFT2_CANAX
AGO3_HUMAN	FOB64_000299_CANAX
AGO3_HUMAN	FOB64_000307_CANAX
AGO3_HUMAN	FOB64_001293_CANAX
AGO3_HUMAN	FOB64_001380_CANAX
AGO3_HUMAN	FOB64_001404_CANAX
AGO3_HUMAN	FOB64_001558_CANAX
AGO3_HUMAN	FOB64_001966_CANAX
AGO3_HUMAN	FOB64_002507_CANAX
AGO3_HUMAN	FOB64_002697_CANAX
AGO3_HUMAN	FOB64_003553_CANAX
AGO3_HUMAN	FOB64_003625_CANAX
AGO3_HUMAN	FOB64_003657_CANAX
AGO3_HUMAN	FOB64_004345_CANAX
AGO3_HUMAN	FOB64_004828_CANAX
AGO3_HUMAN	FOB64_005311_CANAX
AGO3_HUMAN	FOB64_005415_CANAX
AGO3_HUMAN	FOB64_005494_CANAX
AGO3_HUMAN	FOB64_005503_CANAX
AGO3_HUMAN	FOB64_005675_CANAX
AGO3_HUMAN	FOB64_005686_CANAX
AGO3_HUMAN	FOB64_005856_CANAX
AGO3_HUMAN	FOB64_006037_CANAX
AGO3_HUMAN	FOB64_006166_CANAX
AGO3_HUMAN	FOB64_006205_CANAX
AGO3_HUMAN	FOB64_006628_CANAX
AGO3_HUMAN	FOB64_006640_CANAX
AGO3_HUMAN	FOB64_006732_CANAX
AGO3_HUMAN	FOB64_006750_CANAX
AGO3_HUMAN	FOB64_006755_CANAX
AGO3_HUMAN	FOB64_006987_CANAX
AGO3_HUMAN	HSP82_CANAX
AGO3_HUMAN	PRX1_CANAX
AGO3_HUMAN	RLI1_CANAX
AGO3_HUMAN	RPS19A_CANAX
AGO3_HUMAN	RPS21_CANAX
AGO3_HUMAN	RPS28B_CANAX
AGO3_HUMAN	RPT5_CANAX
AGO3_HUMAN	smd2_CANAX
AGO3_HUMAN	SMD3_CANAX
AGO3_HUMAN	TEF1a_CANAX
AGO3_HUMAN	TPK2_CANAX
AGO3_HUMAN	TUB1_CANAX
AGO3_HUMAN	UBI4_CANAX
AGO3_HUMAN	URA3_CANAX
AGO3_HUMAN	YDJ1_CANAX
AGO4_HUMAN	DUT1_CANAX
AGO4_HUMAN	EFT2_CANAX
AGO4_HUMAN	FOB64_001558_CANAX
AGO4_HUMAN	FOB64_003553_CANAX
AGO4_HUMAN	FOB64_003625_CANAX
AGO4_HUMAN	FOB64_004345_CANAX
AGO4_HUMAN	FOB64_004828_CANAX
AGO4_HUMAN	FOB64_005415_CANAX
AGO4_HUMAN	FOB64_005584_CANAX
AGO4_HUMAN	FOB64_005675_CANAX
AGO4_HUMAN	FOB64_005856_CANAX
AGO4_HUMAN	FOB64_006628_CANAX
AGO4_HUMAN	FOB64_006640_CANAX
AGO4_HUMAN	FOB64_006910_CANAX
AGO4_HUMAN	RPS10A_CANAX
AGO4_HUMAN	TUB1_CANAX
AGO4_HUMAN	UBI4_CANAX
AGO4_HUMAN	URA3_CANAX
AGO4_HUMAN	YDJ1_CANAX
AGPAT2_HUMAN	STE24_CANAX
AGPAT3_HUMAN	ERG9_CANAX
AGPAT5_HUMAN	ERG9_CANAX
AGTPBP1_HUMAN	FOB64_005903_CANAX
AGTPBP1_HUMAN	GFA1_CANAX
AGXT2_HUMAN	LSC2_CANAX
AHCTF1_HUMAN	FOB64_004828_CANAX
AHCTF1_HUMAN	FOB64_005942_CANAX
AHI1_HUMAN	FOB64_000073_CANAX
AHI1_HUMAN	FOB64_000215_CANAX
AHI1_HUMAN	FOB64_004140_CANAX
AHI1_HUMAN	FOB64_005675_CANAX
AHI1_HUMAN	IMH3_CANAX
AHI1_HUMAN	TUB1_CANAX
AHI1_HUMAN	UBI4_CANAX
AHNAK_HUMAN	PPH3_CANAX
AHNAK_HUMAN	RVB2_CANAX
AHR_HUMAN	FOB64_000215_CANAX
AHR_HUMAN	FOB64_000845_CANAX
AHR_HUMAN	FOB64_001558_CANAX
AHR_HUMAN	FOB64_003949_CANAX
AHR_HUMAN	FOB64_004828_CANAX
AHR_HUMAN	FOB64_005313_CANAX
AHR_HUMAN	FOB64_005606_CANAX
AHR_HUMAN	FOB64_005613_CANAX
AHR_HUMAN	FOB64_005856_CANAX
AHR_HUMAN	FOB64_005970_CANAX
AHR_HUMAN	FOB64_006072_CANAX
AHR_HUMAN	FOB64_006640_CANAX
AHR_HUMAN	FOB64_006929_CANAX
AHR_HUMAN	MAP2_CANAX
AHR_HUMAN	SOD1_CANAX
AHR_HUMAN	UBI4_CANAX
AHRR_HUMAN	ERG10_CANAX
AHRR_HUMAN	TUB1_CANAX
AHRR_HUMAN	UBI4_CANAX
AHRR_HUMAN	YDJ1_CANAX
AHSA1_HUMAN	AAT2_CANAX
AHSA1_HUMAN	ASC1_CANAX
AHSA1_HUMAN	cdc22_CANAX
AHSA1_HUMAN	CRM1_CANAX
AHSA1_HUMAN	ctp_CANAX
AHSA1_HUMAN	DED1_CANAX
AHSA1_HUMAN	FOB64_000307_CANAX
AHSA1_HUMAN	FOB64_000688_CANAX
AHSA1_HUMAN	FOB64_000902_CANAX
AHSA1_HUMAN	FOB64_001293_CANAX
AHSA1_HUMAN	FOB64_001404_CANAX
AHSA1_HUMAN	FOB64_001558_CANAX
AHSA1_HUMAN	FOB64_001966_CANAX
AHSA1_HUMAN	FOB64_002146_CANAX
AHSA1_HUMAN	FOB64_002215_CANAX
AHSA1_HUMAN	FOB64_002221_CANAX
AHSA1_HUMAN	FOB64_002507_CANAX
AHSA1_HUMAN	FOB64_002697_CANAX
AHSA1_HUMAN	FOB64_003553_CANAX
AHSA1_HUMAN	FOB64_003625_CANAX
AHSA1_HUMAN	FOB64_003657_CANAX
AHSA1_HUMAN	FOB64_003661_CANAX
AHSA1_HUMAN	FOB64_004041_CANAX
AHSA1_HUMAN	FOB64_004177_CANAX
AHSA1_HUMAN	FOB64_004345_CANAX
AHSA1_HUMAN	FOB64_004410_CANAX
AHSA1_HUMAN	FOB64_004828_CANAX
AHSA1_HUMAN	FOB64_004898_CANAX
AHSA1_HUMAN	FOB64_005064_CANAX
AHSA1_HUMAN	FOB64_005107_CANAX
AHSA1_HUMAN	FOB64_005244_CANAX
AHSA1_HUMAN	FOB64_005276_CANAX
AHSA1_HUMAN	FOB64_005311_CANAX
AHSA1_HUMAN	FOB64_005494_CANAX
AHSA1_HUMAN	FOB64_005675_CANAX
AHSA1_HUMAN	FOB64_005903_CANAX
AHSA1_HUMAN	FOB64_005942_CANAX
AHSA1_HUMAN	FOB64_005962_CANAX
AHSA1_HUMAN	FOB64_005970_CANAX
AHSA1_HUMAN	FOB64_006094_CANAX
AHSA1_HUMAN	FOB64_006182_CANAX
AHSA1_HUMAN	FOB64_006628_CANAX
AHSA1_HUMAN	FOB64_006640_CANAX
AHSA1_HUMAN	FOB64_006696_CANAX
AHSA1_HUMAN	FOB64_006750_CANAX
AHSA1_HUMAN	FOB64_006768_CANAX
AHSA1_HUMAN	FOB64_006987_CANAX
AHSA1_HUMAN	GCD11_CANAX
AHSA1_HUMAN	GFA1_CANAX
AHSA1_HUMAN	HSP82_CANAX
AHSA1_HUMAN	IMH3_CANAX
AHSA1_HUMAN	IPP1_CANAX
AHSA1_HUMAN	MES1_CANAX
AHSA1_HUMAN	OLA1_CANAX
AHSA1_HUMAN	PRX1_CANAX
AHSA1_HUMAN	PUP1_CANAX
AHSA1_HUMAN	QNS1_CANAX
AHSA1_HUMAN	RBP2_CANAX
AHSA1_HUMAN	RPL12A_CANAX
AHSA1_HUMAN	rpl16_CANAX
AHSA1_HUMAN	RPL23A_CANAX
AHSA1_HUMAN	RPL5_CANAX
AHSA1_HUMAN	RPL8B_CANAX
AHSA1_HUMAN	RPL9B_CANAX
AHSA1_HUMAN	RPN11_CANAX
AHSA1_HUMAN	RPS10A_CANAX
AHSA1_HUMAN	RPS19A_CANAX
AHSA1_HUMAN	RPS1_CANAX
AHSA1_HUMAN	RPS22A_CANAX
AHSA1_HUMAN	RPS24B_CANAX
AHSA1_HUMAN	RPS4A_CANAX
AHSA1_HUMAN	RPT5_CANAX
AHSA1_HUMAN	SOD1_CANAX
AHSA1_HUMAN	TEF1a_CANAX
AHSA1_HUMAN	TRM7_CANAX
AHSA1_HUMAN	TUB1_CANAX
AHSA1_HUMAN	YDJ1_CANAX
AHSP_HUMAN	GPM1_CANAX
AHSP_HUMAN	RPL8B_CANAX
AICDA_HUMAN	RVB2_CANAX
AICDA_HUMAN	TOP2_CANAX
AIF1_HUMAN	CaJ7.0207_CANAX
AIF1_HUMAN	EFT2_CANAX
AIF1_HUMAN	FOB64_000215_CANAX
AIF1_HUMAN	FOB64_001558_CANAX
AIF1_HUMAN	FOB64_004828_CANAX
AIF1_HUMAN	FOB64_005313_CANAX
AIF1_HUMAN	FOB64_005415_CANAX
AIF1_HUMAN	FOB64_005675_CANAX
AIF1_HUMAN	FOB64_005903_CANAX
AIF1_HUMAN	FOB64_006072_CANAX
AIF1_HUMAN	FOB64_006756_CANAX
AIF1_HUMAN	FOB64_006929_CANAX
AIF1_HUMAN	PGK1_CANAX
AIF1_HUMAN	RPS10A_CANAX
AIF1_HUMAN	SOD1_CANAX
AIF1_HUMAN	TUB1_CANAX
AIF1_HUMAN	UBI4_CANAX
AIF1L_HUMAN	CDC3_CANAX
AIF1L_HUMAN	EFT2_CANAX
AIF1L_HUMAN	SAR1_CANAX
AIF1L_HUMAN	TUB1_CANAX
AIFM1_HUMAN	LSC2_CANAX
AIFM1_HUMAN	SDH2_CANAX
AIFM1_HUMAN	SOD2_CANAX
AIFM3_HUMAN	FOB64_002876_CANAX
AIFM3_HUMAN	FOB64_005305_CANAX
AIFM3_HUMAN	FOB64_006286_CANAX
AIFM3_HUMAN	FOB64_006771_CANAX
AIFM3_HUMAN	HSP10_CANAX
AIFM3_HUMAN	SDH2_CANAX
AIFM3_HUMAN	SOD2_CANAX
AIM2_HUMAN	FOB64_000215_CANAX
AIM2_HUMAN	FOB64_001558_CANAX
AIM2_HUMAN	FOB64_003625_CANAX
AIM2_HUMAN	FOB64_003968_CANAX
AIM2_HUMAN	FOB64_005313_CANAX
AIM2_HUMAN	FOB64_006182_CANAX
AIM2_HUMAN	FOB64_006929_CANAX
AIMP1_HUMAN	CBF5_CANAX
AIMP1_HUMAN	CDC21_CANAX
AIMP1_HUMAN	DIS3_CANAX
AIMP1_HUMAN	FOB64_000606_CANAX
AIMP1_HUMAN	FOB64_002335_CANAX
AIMP1_HUMAN	FOB64_002635_CANAX
AIMP1_HUMAN	FOB64_003032_CANAX
AIMP1_HUMAN	FOB64_003145_CANAX
AIMP1_HUMAN	FOB64_004001_CANAX
AIMP1_HUMAN	FOB64_004386_CANAX
AIMP1_HUMAN	FOB64_005598_CANAX
AIMP1_HUMAN	FOB64_006022_CANAX
AIMP1_HUMAN	FOB64_006393_CANAX
AIMP1_HUMAN	KRR1_CANAX
AIMP1_HUMAN	NAT10_CANAX
AIMP1_HUMAN	NHP6_CANAX
AIMP1_HUMAN	NIP7_CANAX
AIMP1_HUMAN	NOG1_CANAX
AIMP1_HUMAN	NTF2_CANAX
AIMP1_HUMAN	PPH3_CANAX
AIMP1_HUMAN	RPA135_CANAX
AIMP1_HUMAN	RPB2_CANAX
AIMP1_HUMAN	RVB2_CANAX
AIMP1_HUMAN	SEC26_CANAX
AIMP1_HUMAN	SRP54_CANAX
AIMP1_HUMAN	THG1_CANAX
AIMP1_HUMAN	TOP2_CANAX
AIMP2_HUMAN	AAT2_CANAX
AIMP2_HUMAN	ADK2_CANAX
AIMP2_HUMAN	ALA1_CANAX
AIMP2_HUMAN	ASC1_CANAX
AIMP2_HUMAN	FBP1_CANAX
AIMP2_HUMAN	FOB64_000307_CANAX
AIMP2_HUMAN	FOB64_000480_CANAX
AIMP2_HUMAN	FOB64_000688_CANAX
AIMP2_HUMAN	FOB64_000857_CANAX
AIMP2_HUMAN	FOB64_001404_CANAX
AIMP2_HUMAN	FOB64_001406_CANAX
AIMP2_HUMAN	FOB64_001558_CANAX
AIMP2_HUMAN	FOB64_001562_CANAX
AIMP2_HUMAN	FOB64_001966_CANAX
AIMP2_HUMAN	FOB64_002146_CANAX
AIMP2_HUMAN	FOB64_002215_CANAX
AIMP2_HUMAN	FOB64_002221_CANAX
AIMP2_HUMAN	FOB64_002459_CANAX
AIMP2_HUMAN	FOB64_003553_CANAX
AIMP2_HUMAN	FOB64_003657_CANAX
AIMP2_HUMAN	FOB64_003661_CANAX
AIMP2_HUMAN	FOB64_003691_CANAX
AIMP2_HUMAN	FOB64_004041_CANAX
AIMP2_HUMAN	FOB64_004140_CANAX
AIMP2_HUMAN	FOB64_004177_CANAX
AIMP2_HUMAN	FOB64_004345_CANAX
AIMP2_HUMAN	FOB64_004410_CANAX
AIMP2_HUMAN	FOB64_004505_CANAX
AIMP2_HUMAN	FOB64_004828_CANAX
AIMP2_HUMAN	FOB64_004898_CANAX
AIMP2_HUMAN	FOB64_005107_CANAX
AIMP2_HUMAN	FOB64_005152_CANAX
AIMP2_HUMAN	FOB64_005244_CANAX
AIMP2_HUMAN	FOB64_005276_CANAX
AIMP2_HUMAN	FOB64_005311_CANAX
AIMP2_HUMAN	FOB64_005415_CANAX
AIMP2_HUMAN	FOB64_005487_CANAX
AIMP2_HUMAN	FOB64_005494_CANAX
AIMP2_HUMAN	FOB64_005584_CANAX
AIMP2_HUMAN	FOB64_005903_CANAX
AIMP2_HUMAN	FOB64_005942_CANAX
AIMP2_HUMAN	FOB64_005962_CANAX
AIMP2_HUMAN	FOB64_006094_CANAX
AIMP2_HUMAN	FOB64_006219_CANAX
AIMP2_HUMAN	FOB64_006628_CANAX
AIMP2_HUMAN	FOB64_006750_CANAX
AIMP2_HUMAN	FOB64_006768_CANAX
AIMP2_HUMAN	FOB64_006895_CANAX
AIMP2_HUMAN	FOB64_006910_CANAX
AIMP2_HUMAN	FOB64_006987_CANAX
AIMP2_HUMAN	FOB64_007019_CANAX
AIMP2_HUMAN	FRS1_CANAX
AIMP2_HUMAN	GCD11_CANAX
AIMP2_HUMAN	HAM1_CANAX
AIMP2_HUMAN	HSP82_CANAX
AIMP2_HUMAN	IMH3_CANAX
AIMP2_HUMAN	IPP1_CANAX
AIMP2_HUMAN	LIA1_CANAX
AIMP2_HUMAN	MES1_CANAX
AIMP2_HUMAN	OLA1_CANAX
AIMP2_HUMAN	PRE1_CANAX
AIMP2_HUMAN	PUP1_CANAX
AIMP2_HUMAN	RLI1_CANAX
AIMP2_HUMAN	RPL12A_CANAX
AIMP2_HUMAN	RPL15B_CANAX
AIMP2_HUMAN	rpl16_CANAX
AIMP2_HUMAN	RPL19B_CANAX
AIMP2_HUMAN	RPL20B_CANAX
AIMP2_HUMAN	RPL23A_CANAX
AIMP2_HUMAN	RPL28_CANAX
AIMP2_HUMAN	RPL5_CANAX
AIMP2_HUMAN	RPL7A_CANAX
AIMP2_HUMAN	RPL8B_CANAX
AIMP2_HUMAN	RPL9B_CANAX
AIMP2_HUMAN	RPN11_CANAX
AIMP2_HUMAN	RPS0_CANAX
AIMP2_HUMAN	RPS10A_CANAX
AIMP2_HUMAN	RPS19A_CANAX
AIMP2_HUMAN	RPS1_CANAX
AIMP2_HUMAN	RPS22A_CANAX
AIMP2_HUMAN	RPS24B_CANAX
AIMP2_HUMAN	RPS26A_CANAX
AIMP2_HUMAN	RPS4A_CANAX
AIMP2_HUMAN	RPT5_CANAX
AIMP2_HUMAN	smd2_CANAX
AIMP2_HUMAN	SMD3_CANAX
AIMP2_HUMAN	TEF1a_CANAX
AIMP2_HUMAN	TMA20_CANAX
AIMP2_HUMAN	TUB1_CANAX
AIMP2_HUMAN	UBI4_CANAX
AIMP2_HUMAN	URA3_CANAX
AIMP2_HUMAN	WRS1_CANAX
AIP_HUMAN	ACB1_CANAX
AIP_HUMAN	FOB64_000545_CANAX
AIP_HUMAN	FOB64_001558_CANAX
AIP_HUMAN	FOB64_004345_CANAX
AIP_HUMAN	FOB64_004371_CANAX
AIP_HUMAN	FOB64_004828_CANAX
AIP_HUMAN	FOB64_005675_CANAX
AIP_HUMAN	GCD11_CANAX
AIP_HUMAN	IPP1_CANAX
AIP_HUMAN	QNS1_CANAX
AIP_HUMAN	SOD1_CANAX
AIP_HUMAN	TUB1_CANAX
AIP_HUMAN	YDJ1_CANAX
AIPL1_HUMAN	ACB1_CANAX
AIPL1_HUMAN	FOB64_004828_CANAX
AIPL1_HUMAN	IMH3_CANAX
AIPL1_HUMAN	QNS1_CANAX
AIPL1_HUMAN	SOD1_CANAX
AIPL1_HUMAN	UBI4_CANAX
AIPL1_HUMAN	YDJ1_CANAX
AIRE_HUMAN	RPA135_CANAX
AIRE_HUMAN	RVB2_CANAX
AIRE_HUMAN	TOP2_CANAX
AIRIM_HUMAN	NIP7_CANAX
AJUBA_HUMAN	FOB64_000215_CANAX
AJUBA_HUMAN	FOB64_003691_CANAX
AJUBA_HUMAN	FOB64_005942_CANAX
AJUBA_HUMAN	FOB64_006756_CANAX
AJUBA_HUMAN	IMH3_CANAX
AJUBA_HUMAN	UBI4_CANAX
AK1_HUMAN	HAM1_CANAX
AK1_HUMAN	UBI4_CANAX
AK2_HUMAN	LSC2_CANAX
AK2_HUMAN	MAE1_CANAX
AK2_HUMAN	SDH2_CANAX
AK2_HUMAN	SOD2_CANAX
AK5_HUMAN	ACS1_CANAX
AK5_HUMAN	ADK2_CANAX
AK5_HUMAN	CaJ7.0207_CANAX
AK5_HUMAN	DUT1_CANAX
AK5_HUMAN	EFT2_CANAX
AK5_HUMAN	FOB64_000215_CANAX
AK5_HUMAN	FOB64_000480_CANAX
AK5_HUMAN	FOB64_001558_CANAX
AK5_HUMAN	FOB64_001976_CANAX
AK5_HUMAN	FOB64_003553_CANAX
AK5_HUMAN	FOB64_003661_CANAX
AK5_HUMAN	FOB64_003691_CANAX
AK5_HUMAN	FOB64_004041_CANAX
AK5_HUMAN	FOB64_004140_CANAX
AK5_HUMAN	FOB64_004345_CANAX
AK5_HUMAN	FOB64_004371_CANAX
AK5_HUMAN	FOB64_004410_CANAX
AK5_HUMAN	FOB64_005584_CANAX
AK5_HUMAN	FOB64_005787_CANAX
AK5_HUMAN	FOB64_005903_CANAX
AK5_HUMAN	FOB64_005962_CANAX
AK5_HUMAN	FOB64_006072_CANAX
AK5_HUMAN	FOB64_006628_CANAX
AK5_HUMAN	FOB64_006640_CANAX
AK5_HUMAN	FOB64_006935_CANAX
AK5_HUMAN	GUK1_CANAX
AK5_HUMAN	HAM1_CANAX
AK5_HUMAN	IMH3_CANAX
AK5_HUMAN	IPP1_CANAX
AK5_HUMAN	PGK1_CANAX
AK5_HUMAN	RPL9B_CANAX
AK5_HUMAN	RPS22A_CANAX
AK5_HUMAN	SPS19_CANAX
AK5_HUMAN	TUB1_CANAX
AK5_HUMAN	URA3_CANAX
AK6_HUMAN	LSC2_CANAX
AK6_HUMAN	swoH_CANAX
AK7_HUMAN	ACS1_CANAX
AK7_HUMAN	ADK2_CANAX
AK7_HUMAN	CaJ7.0207_CANAX
AK7_HUMAN	DUT1_CANAX
AK7_HUMAN	EFT2_CANAX
AK7_HUMAN	ERG10_CANAX
AK7_HUMAN	FBP1_CANAX
AK7_HUMAN	FOB64_000480_CANAX
AK7_HUMAN	FOB64_001558_CANAX
AK7_HUMAN	FOB64_001976_CANAX
AK7_HUMAN	FOB64_003553_CANAX
AK7_HUMAN	FOB64_003691_CANAX
AK7_HUMAN	FOB64_004041_CANAX
AK7_HUMAN	FOB64_004140_CANAX
AK7_HUMAN	FOB64_004263_CANAX
AK7_HUMAN	FOB64_004345_CANAX
AK7_HUMAN	FOB64_004371_CANAX
AK7_HUMAN	FOB64_004410_CANAX
AK7_HUMAN	FOB64_004828_CANAX
AK7_HUMAN	FOB64_005276_CANAX
AK7_HUMAN	FOB64_005584_CANAX
AK7_HUMAN	FOB64_005787_CANAX
AK7_HUMAN	FOB64_005856_CANAX
AK7_HUMAN	FOB64_005962_CANAX
AK7_HUMAN	FOB64_006072_CANAX
AK7_HUMAN	FOB64_006628_CANAX
AK7_HUMAN	FOB64_006640_CANAX
AK7_HUMAN	FOB64_006910_CANAX
AK7_HUMAN	FOB64_006935_CANAX
AK7_HUMAN	FOB64_007019_CANAX
AK7_HUMAN	GUK1_CANAX
AK7_HUMAN	HAM1_CANAX
AK7_HUMAN	IMH3_CANAX
AK7_HUMAN	IPP1_CANAX
AK7_HUMAN	PGK1_CANAX
AK7_HUMAN	RPL9B_CANAX
AK7_HUMAN	RPS22A_CANAX
AK7_HUMAN	URA3_CANAX
AK8_HUMAN	DUT1_CANAX
AK8_HUMAN	EFT2_CANAX
AK8_HUMAN	GUK1_CANAX
AK8_HUMAN	HAM1_CANAX
AK8_HUMAN	IPP1_CANAX
AK8_HUMAN	MET14_CANAX
AK8_HUMAN	PGK1_CANAX
AK8_HUMAN	RPL9B_CANAX
AK8_HUMAN	RPS22A_CANAX
AK8_HUMAN	URA3_CANAX
AK9_HUMAN	DUT1_CANAX
AK9_HUMAN	EFT2_CANAX
AK9_HUMAN	FRS1_CANAX
AK9_HUMAN	GUK1_CANAX
AK9_HUMAN	HAM1_CANAX
AK9_HUMAN	IPP1_CANAX
AK9_HUMAN	PGK1_CANAX
AK9_HUMAN	RPL9B_CANAX
AK9_HUMAN	RPS22A_CANAX
AK9_HUMAN	URA3_CANAX
AKAP12_HUMAN	CDC3_CANAX
AKAP12_HUMAN	FOB64_000251_CANAX
AKAP12_HUMAN	FOB64_001558_CANAX
AKAP12_HUMAN	FOB64_005675_CANAX
AKAP12_HUMAN	FOB64_006640_CANAX
AKAP12_HUMAN	GFA1_CANAX
AKAP12_HUMAN	TUB1_CANAX
AKAP13_HUMAN	APS3_CANAX
AKAP13_HUMAN	ASC1_CANAX
AKAP13_HUMAN	CaJ7.0207_CANAX
AKAP13_HUMAN	CDC3_CANAX
AKAP13_HUMAN	FOB64_001558_CANAX
AKAP13_HUMAN	FOB64_002507_CANAX
AKAP13_HUMAN	FOB64_004828_CANAX
AKAP13_HUMAN	FOB64_005313_CANAX
AKAP13_HUMAN	FOB64_006696_CANAX
AKAP13_HUMAN	FOB64_007019_CANAX
AKAP13_HUMAN	IPP1_CANAX
AKAP13_HUMAN	MET14_CANAX
AKAP13_HUMAN	TPK2_CANAX
AKAP13_HUMAN	UBI4_CANAX
AKAP17A_HUMAN	PPH3_CANAX
AKAP1_HUMAN	FOB64_000777_CANAX
AKAP1_HUMAN	FOB64_002876_CANAX
AKAP1_HUMAN	LSC2_CANAX
AKAP1_HUMAN	SUCLG1_CANAX
AKAP1_HUMAN	swoH_CANAX
AKAP3_HUMAN	PGK1_CANAX
AKAP3_HUMAN	UBI4_CANAX
AKAP8_HUMAN	FOB64_000606_CANAX
AKAP8_HUMAN	FOB64_004607_CANAX
AKAP8_HUMAN	FOB64_005814_CANAX
AKAP8_HUMAN	FOB64_006022_CANAX
AKAP8_HUMAN	RVB2_CANAX
AKAP8L_HUMAN	NRPB1_CANAX
AKAP8L_HUMAN	RVB2_CANAX
AKAP8L_HUMAN	SNF1_CANAX
AKAP8L_HUMAN	TOP2_CANAX
AKIRIN1_HUMAN	FOB64_000606_CANAX
AKIRIN1_HUMAN	FOB64_003032_CANAX
AKIRIN1_HUMAN	FOB64_003145_CANAX
AKIRIN1_HUMAN	FOB64_005598_CANAX
AKIRIN1_HUMAN	FOB64_005814_CANAX
AKIRIN1_HUMAN	FOB64_006393_CANAX
AKIRIN1_HUMAN	KRR1_CANAX
AKIRIN1_HUMAN	MCM4_CANAX
AKIRIN1_HUMAN	NAT10_CANAX
AKIRIN1_HUMAN	NHP6_CANAX
AKIRIN1_HUMAN	NOG1_CANAX
AKIRIN1_HUMAN	PPH3_CANAX
AKIRIN1_HUMAN	RVB2_CANAX
AKIRIN2_HUMAN	CBF5_CANAX
AKIRIN2_HUMAN	CDC21_CANAX
AKIRIN2_HUMAN	FOB64_000606_CANAX
AKIRIN2_HUMAN	FOB64_002335_CANAX
AKIRIN2_HUMAN	FOB64_002635_CANAX
AKIRIN2_HUMAN	FOB64_003032_CANAX
AKIRIN2_HUMAN	FOB64_003145_CANAX
AKIRIN2_HUMAN	FOB64_004001_CANAX
AKIRIN2_HUMAN	FOB64_004607_CANAX
AKIRIN2_HUMAN	FOB64_005598_CANAX
AKIRIN2_HUMAN	FOB64_005765_CANAX
AKIRIN2_HUMAN	FOB64_005814_CANAX
AKIRIN2_HUMAN	FOB64_006022_CANAX
AKIRIN2_HUMAN	FOB64_006393_CANAX
AKIRIN2_HUMAN	KRR1_CANAX
AKIRIN2_HUMAN	NAT10_CANAX
AKIRIN2_HUMAN	NHP6_CANAX
AKIRIN2_HUMAN	NOG1_CANAX
AKIRIN2_HUMAN	PIN1_CANAX
AKIRIN2_HUMAN	PPH3_CANAX
AKIRIN2_HUMAN	RNR2_CANAX
AKIRIN2_HUMAN	RPB5_CANAX
AKIRIN2_HUMAN	RVB2_CANAX
AKIRIN2_HUMAN	SEC26_CANAX
AKIRIN2_HUMAN	SNF1_CANAX
AKIRIN2_HUMAN	SRP54_CANAX
AKIRIN2_HUMAN	TOP2_CANAX
AKIRIN2_HUMAN	VPS4_CANAX
AKR1C1_HUMAN	ACB1_CANAX
AKR1C1_HUMAN	ADK2_CANAX
AKR1C1_HUMAN	CaJ7.0207_CANAX
AKR1C1_HUMAN	FBP1_CANAX
AKR1C1_HUMAN	FOB64_000021_CANAX
AKR1C1_HUMAN	FOB64_000073_CANAX
AKR1C1_HUMAN	FOB64_000845_CANAX
AKR1C1_HUMAN	FOB64_001558_CANAX
AKR1C1_HUMAN	FOB64_001854_CANAX
AKR1C1_HUMAN	FOB64_001976_CANAX
AKR1C1_HUMAN	FOB64_002244_CANAX
AKR1C1_HUMAN	FOB64_003907_CANAX
AKR1C1_HUMAN	FOB64_003949_CANAX
AKR1C1_HUMAN	FOB64_004410_CANAX
AKR1C1_HUMAN	FOB64_004828_CANAX
AKR1C1_HUMAN	FOB64_005584_CANAX
AKR1C1_HUMAN	FOB64_005613_CANAX
AKR1C1_HUMAN	FOB64_005787_CANAX
AKR1C1_HUMAN	FOB64_005856_CANAX
AKR1C1_HUMAN	FOB64_005903_CANAX
AKR1C1_HUMAN	FOB64_006072_CANAX
AKR1C1_HUMAN	FOB64_006640_CANAX
AKR1C1_HUMAN	FOB64_006910_CANAX
AKR1C1_HUMAN	MET14_CANAX
AKR1C1_HUMAN	PGK1_CANAX
AKR1C1_HUMAN	SOD1_CANAX
AKR1C1_HUMAN	SPS19_CANAX
AKR1C1_HUMAN	URA3_CANAX
AKR1C1_HUMAN	YDJ1_CANAX
AKR1C2_HUMAN	ACB1_CANAX
AKR1C2_HUMAN	FBP1_CANAX
AKR1C2_HUMAN	MET14_CANAX
AKR1C2_HUMAN	PGK1_CANAX
AKR1C2_HUMAN	SOD1_CANAX
AKR1C2_HUMAN	TUB1_CANAX
AKR1C3_HUMAN	ACB1_CANAX
AKR1C3_HUMAN	ADK2_CANAX
AKR1C3_HUMAN	CaJ7.0207_CANAX
AKR1C3_HUMAN	FBP1_CANAX
AKR1C3_HUMAN	FOB64_000021_CANAX
AKR1C3_HUMAN	FOB64_000073_CANAX
AKR1C3_HUMAN	FOB64_001558_CANAX
AKR1C3_HUMAN	FOB64_001976_CANAX
AKR1C3_HUMAN	FOB64_002244_CANAX
AKR1C3_HUMAN	FOB64_003907_CANAX
AKR1C3_HUMAN	FOB64_004828_CANAX
AKR1C3_HUMAN	FOB64_005584_CANAX
AKR1C3_HUMAN	FOB64_005613_CANAX
AKR1C3_HUMAN	FOB64_005787_CANAX
AKR1C3_HUMAN	FOB64_005856_CANAX
AKR1C3_HUMAN	FOB64_005903_CANAX
AKR1C3_HUMAN	FOB64_006072_CANAX
AKR1C3_HUMAN	FOB64_006640_CANAX
AKR1C3_HUMAN	FOB64_006910_CANAX
AKR1C3_HUMAN	MET14_CANAX
AKR1C3_HUMAN	PGK1_CANAX
AKR1C3_HUMAN	SOD1_CANAX
AKR1C3_HUMAN	SPS19_CANAX
AKR1C3_HUMAN	TUB1_CANAX
AKR1C4_HUMAN	AAT2_CANAX
AKR1C4_HUMAN	ACB1_CANAX
AKR1C4_HUMAN	ADK2_CANAX
AKR1C4_HUMAN	AGM1_CANAX
AKR1C4_HUMAN	CaJ7.0207_CANAX
AKR1C4_HUMAN	DUG1_CANAX
AKR1C4_HUMAN	ERG20_CANAX
AKR1C4_HUMAN	FBP1_CANAX
AKR1C4_HUMAN	FOB64_000021_CANAX
AKR1C4_HUMAN	FOB64_000073_CANAX
AKR1C4_HUMAN	FOB64_000614_CANAX
AKR1C4_HUMAN	FOB64_001558_CANAX
AKR1C4_HUMAN	FOB64_001573_CANAX
AKR1C4_HUMAN	FOB64_001589_CANAX
AKR1C4_HUMAN	FOB64_001732_CANAX
AKR1C4_HUMAN	FOB64_001976_CANAX
AKR1C4_HUMAN	FOB64_002235_CANAX
AKR1C4_HUMAN	FOB64_002244_CANAX
AKR1C4_HUMAN	FOB64_003258_CANAX
AKR1C4_HUMAN	FOB64_003855_CANAX
AKR1C4_HUMAN	FOB64_003907_CANAX
AKR1C4_HUMAN	FOB64_003968_CANAX
AKR1C4_HUMAN	FOB64_004742_CANAX
AKR1C4_HUMAN	FOB64_004828_CANAX
AKR1C4_HUMAN	FOB64_005244_CANAX
AKR1C4_HUMAN	FOB64_005271_CANAX
AKR1C4_HUMAN	FOB64_005584_CANAX
AKR1C4_HUMAN	FOB64_005613_CANAX
AKR1C4_HUMAN	FOB64_005673_CANAX
AKR1C4_HUMAN	FOB64_005787_CANAX
AKR1C4_HUMAN	FOB64_005856_CANAX
AKR1C4_HUMAN	FOB64_005903_CANAX
AKR1C4_HUMAN	FOB64_006072_CANAX
AKR1C4_HUMAN	FOB64_006640_CANAX
AKR1C4_HUMAN	FOB64_006910_CANAX
AKR1C4_HUMAN	MES1_CANAX
AKR1C4_HUMAN	PGK1_CANAX
AKR1C4_HUMAN	QRI1_CANAX
AKR1C4_HUMAN	SOD1_CANAX
AKR1C4_HUMAN	SPS19_CANAX
AKR1C4_HUMAN	UAP1_CANAX
AKR1C4_HUMAN	URA3_CANAX
AKR1D1_HUMAN	ACB1_CANAX
AKR1D1_HUMAN	FBP1_CANAX
AKR1D1_HUMAN	MET14_CANAX
AKR1D1_HUMAN	PGK1_CANAX
AKR1D1_HUMAN	SOD1_CANAX
AKR1D1_HUMAN	TUB1_CANAX
AKR1D1_HUMAN	URA3_CANAX
AKR7A2_HUMAN	FOB64_000777_CANAX
AKR7A2_HUMAN	FOB64_001397_CANAX
AKR7A2_HUMAN	FOB64_004262_CANAX
AKR7A2_HUMAN	FOB64_006286_CANAX
AKR7A2_HUMAN	FOB64_006771_CANAX
AKR7A3_HUMAN	FBP1_CANAX
AKR7A3_HUMAN	FOB64_003968_CANAX
AKR7A3_HUMAN	FOB64_004828_CANAX
AKR7A3_HUMAN	FOB64_005962_CANAX
AKR7A3_HUMAN	FOB64_006640_CANAX
AKT1_HUMAN	ACB1_CANAX
AKT1_HUMAN	ACS1_CANAX
AKT1_HUMAN	CaJ7.0207_CANAX
AKT1_HUMAN	CDC3_CANAX
AKT1_HUMAN	ctp_CANAX
AKT1_HUMAN	EFT2_CANAX
AKT1_HUMAN	ERG10_CANAX
AKT1_HUMAN	FBP1_CANAX
AKT1_HUMAN	FOB64_000021_CANAX
AKT1_HUMAN	FOB64_000073_CANAX
AKT1_HUMAN	FOB64_000215_CANAX
AKT1_HUMAN	FOB64_000251_CANAX
AKT1_HUMAN	FOB64_000845_CANAX
AKT1_HUMAN	FOB64_001129_CANAX
AKT1_HUMAN	FOB64_001293_CANAX
AKT1_HUMAN	FOB64_001558_CANAX
AKT1_HUMAN	FOB64_001854_CANAX
AKT1_HUMAN	FOB64_001976_CANAX
AKT1_HUMAN	FOB64_002244_CANAX
AKT1_HUMAN	FOB64_003553_CANAX
AKT1_HUMAN	FOB64_003625_CANAX
AKT1_HUMAN	FOB64_003949_CANAX
AKT1_HUMAN	FOB64_004140_CANAX
AKT1_HUMAN	FOB64_004345_CANAX
AKT1_HUMAN	FOB64_004371_CANAX
AKT1_HUMAN	FOB64_004410_CANAX
AKT1_HUMAN	FOB64_004828_CANAX
AKT1_HUMAN	FOB64_005313_CANAX
AKT1_HUMAN	FOB64_005415_CANAX
AKT1_HUMAN	FOB64_005584_CANAX
AKT1_HUMAN	FOB64_005613_CANAX
AKT1_HUMAN	FOB64_005675_CANAX
AKT1_HUMAN	FOB64_005856_CANAX
AKT1_HUMAN	FOB64_005903_CANAX
AKT1_HUMAN	FOB64_005962_CANAX
AKT1_HUMAN	FOB64_006072_CANAX
AKT1_HUMAN	FOB64_006182_CANAX
AKT1_HUMAN	FOB64_006640_CANAX
AKT1_HUMAN	FOB64_006756_CANAX
AKT1_HUMAN	FOB64_006895_CANAX
AKT1_HUMAN	FOB64_006910_CANAX
AKT1_HUMAN	FOB64_006929_CANAX
AKT1_HUMAN	FOB64_007019_CANAX
AKT1_HUMAN	GFA1_CANAX
AKT1_HUMAN	GTR2_CANAX
AKT1_HUMAN	GUK1_CANAX
AKT1_HUMAN	IMH3_CANAX
AKT1_HUMAN	IPP1_CANAX
AKT1_HUMAN	MAP2_CANAX
AKT1_HUMAN	MDE1_CANAX
AKT1_HUMAN	PGK1_CANAX
AKT1_HUMAN	RPL7A_CANAX
AKT1_HUMAN	SOD1_CANAX
AKT1_HUMAN	TUB1_CANAX
AKT1_HUMAN	UBI4_CANAX
AKT1_HUMAN	YDJ1_CANAX
AKT1S1_HUMAN	EFT2_CANAX
AKT2_HUMAN	ACS1_CANAX
AKT2_HUMAN	CaJ7.0207_CANAX
AKT2_HUMAN	EFT2_CANAX
AKT2_HUMAN	FBP1_CANAX
AKT2_HUMAN	FOB64_000215_CANAX
AKT2_HUMAN	FOB64_000845_CANAX
AKT2_HUMAN	FOB64_001129_CANAX
AKT2_HUMAN	FOB64_001293_CANAX
AKT2_HUMAN	FOB64_001558_CANAX
AKT2_HUMAN	FOB64_003949_CANAX
AKT2_HUMAN	FOB64_005313_CANAX
AKT2_HUMAN	FOB64_005415_CANAX
AKT2_HUMAN	FOB64_005675_CANAX
AKT2_HUMAN	FOB64_005962_CANAX
AKT2_HUMAN	FOB64_006072_CANAX
AKT2_HUMAN	FOB64_006182_CANAX
AKT2_HUMAN	FOB64_006929_CANAX
AKT2_HUMAN	GFA1_CANAX
AKT2_HUMAN	GTR2_CANAX
AKT2_HUMAN	IMH3_CANAX
AKT2_HUMAN	SOD1_CANAX
AKT2_HUMAN	UBI4_CANAX
AKTIP_HUMAN	ctp_CANAX
AKTIP_HUMAN	EFT2_CANAX
AKTIP_HUMAN	FOB64_000215_CANAX
AKTIP_HUMAN	FOB64_001558_CANAX
AKTIP_HUMAN	FOB64_003661_CANAX
AKTIP_HUMAN	FOB64_004828_CANAX
AKTIP_HUMAN	FOB64_005675_CANAX
AKTIP_HUMAN	FOB64_005903_CANAX
AKTIP_HUMAN	FOB64_006182_CANAX
AKTIP_HUMAN	RPS22A_CANAX
AKTIP_HUMAN	UBI4_CANAX
AKTIP_HUMAN	YDJ1_CANAX
ALAS1_HUMAN	FOB64_003587_CANAX
ALAS1_HUMAN	FOB64_004262_CANAX
ALAS1_HUMAN	FOB64_006074_CANAX
ALAS1_HUMAN	FOB64_006286_CANAX
ALAS1_HUMAN	LSC2_CANAX
ALAS1_HUMAN	SDH2_CANAX
ALAS1_HUMAN	SUCLG1_CANAX
ALAS2_HUMAN	LSC2_CANAX
ALB_HUMAN	ACB1_CANAX
ALB_HUMAN	EFT2_CANAX
ALB_HUMAN	ERG10_CANAX
ALB_HUMAN	FBP1_CANAX
ALB_HUMAN	GFA1_CANAX
ALB_HUMAN	GUK1_CANAX
ALB_HUMAN	HAM1_CANAX
ALB_HUMAN	IMH3_CANAX
ALB_HUMAN	IPP1_CANAX
ALB_HUMAN	PGK1_CANAX
ALB_HUMAN	SOD1_CANAX
ALB_HUMAN	TUB1_CANAX
ALB_HUMAN	UBI4_CANAX
ALB_HUMAN	YDJ1_CANAX
ALDH7A1_HUMAN	ACB1_CANAX
ALDH7A1_HUMAN	CDC3_CANAX
ALDH7A1_HUMAN	EFT2_CANAX
ALDH7A1_HUMAN	ERG10_CANAX
ALDH7A1_HUMAN	FBP1_CANAX
ALDH7A1_HUMAN	IPP1_CANAX
ALDH7A1_HUMAN	PGK1_CANAX
ALDH7A1_HUMAN	SOD1_CANAX
ALDH7A1_HUMAN	TUB1_CANAX
ALDH7A1_HUMAN	URA3_CANAX
ALDH8A1_HUMAN	ACB1_CANAX
ALDH8A1_HUMAN	ERG10_CANAX
ALDH8A1_HUMAN	FBP1_CANAX
ALDH8A1_HUMAN	MET14_CANAX
ALDH8A1_HUMAN	PGK1_CANAX
ALDH8A1_HUMAN	SOD1_CANAX
ALDH8A1_HUMAN	UBI4_CANAX
ALDH9A1_HUMAN	ACB1_CANAX
ALDH9A1_HUMAN	ERG10_CANAX
ALDH9A1_HUMAN	FBP1_CANAX
ALDH9A1_HUMAN	IMH3_CANAX
ALDH9A1_HUMAN	PGK1_CANAX
ALDH9A1_HUMAN	SOD1_CANAX
ALDH9A1_HUMAN	TUB1_CANAX
ALDH9A1_HUMAN	UBI4_CANAX
ALDH9A1_HUMAN	URA3_CANAX
ALDOA_HUMAN	APS2_CANAX
ALDOA_HUMAN	CaJ7.0207_CANAX
ALDOA_HUMAN	ctp_CANAX
ALDOA_HUMAN	DUT1_CANAX
ALDOA_HUMAN	EFT2_CANAX
ALDOA_HUMAN	ERG10_CANAX
ALDOA_HUMAN	FBP1_CANAX
ALDOA_HUMAN	FOB64_000021_CANAX
ALDOA_HUMAN	FOB64_001558_CANAX
ALDOA_HUMAN	FOB64_001732_CANAX
ALDOA_HUMAN	FOB64_001976_CANAX
ALDOA_HUMAN	FOB64_002244_CANAX
ALDOA_HUMAN	FOB64_002507_CANAX
ALDOA_HUMAN	FOB64_002697_CANAX
ALDOA_HUMAN	FOB64_004371_CANAX
ALDOA_HUMAN	FOB64_004583_CANAX
ALDOA_HUMAN	FOB64_004828_CANAX
ALDOA_HUMAN	FOB64_005584_CANAX
ALDOA_HUMAN	FOB64_005903_CANAX
ALDOA_HUMAN	FOB64_006628_CANAX
ALDOA_HUMAN	GPM1_CANAX
ALDOA_HUMAN	HSP82_CANAX
ALDOA_HUMAN	INO1_CANAX
ALDOA_HUMAN	kgd2_CANAX
ALDOA_HUMAN	PGI1_CANAX
ALDOA_HUMAN	PGK1_CANAX
ALDOA_HUMAN	RPL12A_CANAX
ALDOA_HUMAN	RPS1_CANAX
ALDOA_HUMAN	RPS22A_CANAX
ALDOA_HUMAN	RPS4A_CANAX
ALDOA_HUMAN	RPT5_CANAX
ALDOA_HUMAN	TEF1a_CANAX
ALDOA_HUMAN	TUB1_CANAX
ALDOA_HUMAN	UBI4_CANAX
ALDOA_HUMAN	URA3_CANAX
ALDOB_HUMAN	CaJ7.0207_CANAX
ALDOB_HUMAN	FBP1_CANAX
ALDOB_HUMAN	FOB64_000021_CANAX
ALDOB_HUMAN	FOB64_005903_CANAX
ALG10_HUMAN	ERG9_CANAX
ALG10_HUMAN	STE24_CANAX
ALG11_HUMAN	ERG9_CANAX
ALG1_HUMAN	STE24_CANAX
ALG3_HUMAN	STE24_CANAX
ALG5_HUMAN	ERG9_CANAX
ALG5_HUMAN	STE24_CANAX
ALG9_HUMAN	ERG9_CANAX
ALKBH1_HUMAN	CBF5_CANAX
[truncated: 54,516 more rows]
