# Supplementary material for: Computational prediction of Homo sapiens–Candida albicans protein–protein interactions reveal key virulence factors using dual RNA-Seq data analysis
Source: Springer Nature journal article supplement (doi:10.1007/s00203-025-04312-4), 2025-04-06
Supplement: MOESM2 [file 203_2025_4312_MOESM2_ESM.xlsx]

## Sheet: Network_centrality_metrices
Genes	Degree_centrality	betweenness_centrality
TUB1_CANAX	1633	1.6656e+06
PPH3_CANAX	1417	1.25309e+06
UBI4_CANAX	1403	1.13368e+06
RVB2_CANAX	1106	648719
FOB64_001558_CANAX	934	380443
TOP2_CANAX	827	366684
FOB64_000606_CANAX	881	366476
NHP6_CANAX	833	340601
FOB64_004828_CANAX	835	304951
SNF1_CANAX	442	286718
FOB64_000215_CANAX	749	281235
SOD1_CANAX	652	274295
FOB64_006022_CANAX	751	220216
YDJ1_CANAX	549	190553
NOG1_CANAX	519	189077
EFT2_CANAX	607	186126
PGK1_CANAX	516	182510
HAS1_CANAX	657	178318
FOB64_005675_CANAX	636	172790
FOB64_005814_CANAX	625	152146
ACB1_CANAX	455	148405
CDC3_CANAX	373	141212
FOB64_005415_CANAX	561	135331
RPA135_CANAX	501	132672
IMH3_CANAX	416	125064
RAD3_CANAX	387	114330
FOB64_005313_CANAX	536	108882
IPP1_CANAX	369	99845.3
SDH2_CANAX	432	90826.1
CDC21_CANAX	409	88172.4
KRR1_CANAX	362	83074.2
RPB2_CANAX	518	81758.7
FOB64_006182_CANAX	417	80114.1
FOB64_005087_CANAX	119	77854.5
GUK1_CANAX	316	77714.9
MET14_CANAX	216	75760.5
NIP7_CANAX	385	73786.6
FOB64_004001_CANAX	424	71508.3
RPL9B_CANAX	341	64136.7
FRS1_CANAX	228	63992.6
FBP1_CANAX	239	63443.2
DUT1_CANAX	275	61559.2
GFA1_CANAX	256	60871.2
LRRK2_HUMAN	192	59667.6
SOD2_CANAX	355	59048.7
RPB5_CANAX	408	56427
FOB64_004607_CANAX	427	55851.7
FOB64_002635_CANAX	409	55188.1
FOB64_005962_CANAX	346	55006.7
ctp_CANAX	283	54584.4
APS3_CANAX	181	54296.8
SRP54_CANAX	273	53804.6
FOB64_005903_CANAX	378	52992.2
MCM4_CANAX	390	51562.7
NTF2_CANAX	241	51333.5
SAR1_CANAX	232	51267
CBF5_CANAX	416	51163.2
URA3_CANAX	309	50875.3
FOB64_003553_CANAX	382	49720.2
FOB64_003625_CANAX	309	49702.5
PRE1_CANAX	323	49057.7
PRKN_HUMAN	175	48232.8
PIN1_CANAX	261	46744.8
RNR2_CANAX	339	45057.4
HAM1_CANAX	248	44311.8
GCN20_CANAX	219	44213.9
FOB64_006910_CANAX	322	44161.4
RPL20B_CANAX	298	43838
VPS4_CANAX	148	42634.7
FOB64_002335_CANAX	298	40621.7
NAT10_CANAX	355	40301.8
FOB64_000251_CANAX	295	40146.2
ERG9_CANAX	187	38515.3
RPS22A_CANAX	301	38402.4
FOB64_004386_CANAX	348	37985.5
FOB64_004345_CANAX	350	37213.9
DIS3_CANAX	284	36553.8
GCD11_CANAX	285	36532.4
ERG10_CANAX	200	36275.8
YARS1_HUMAN	162	35913.9
SEC26_CANAX	173	33237.6
FOB64_005598_CANAX	228	32854.8
FOB64_001293_CANAX	238	32349.8
DLH1_CANAX	226	29653.6
FOB64_005613_CANAX	209	29053.8
FOB64_005942_CANAX	207	28925.3
LSC2_CANAX	234	28297.5
FOB64_003968_CANAX	222	27700.5
FOB64_006072_CANAX	311	27008.7
FOB64_004041_CANAX	243	26832.5
PTEN_HUMAN	127	25203.5
HPRT1_HUMAN	118	23947.5
RPL7A_CANAX	226	23157.2
RPC40_CANAX	96	22735.4
FOB64_003145_CANAX	229	22540
STE24_CANAX	117	22430.2
RARS1_HUMAN	130	21630.7
FOB64_006732_CANAX	185	21256.6
HTA1_CANAX	176	21130.1
FOB64_006940_CANAX	222	21047.9
FASN_HUMAN	107	21011.6
FOB64_003661_CANAX	195	20738.3
FOB64_006756_CANAX	170	20192.7
PLEC_HUMAN	113	19578.5
ATG7_HUMAN	89	18559.9
FOB64_006640_CANAX	210	17814.7
FOB64_000845_CANAX	185	17671
FOB64_003032_CANAX	216	17554.1
FOB64_006393_CANAX	187	17019.6
PHO85_CANAX	175	16754
HIF1A_HUMAN	85	16695.2
ADRM1_HUMAN	104	16452.2
SQSTM1_HUMAN	102	16400.4
FOB64_006935_CANAX	178	16294.4
FOB64_005584_CANAX	184	16190.7
FOB64_005787_CANAX	172	15582
CaJ7.0207_CANAX	212	15429
FOB64_006628_CANAX	242	15320.1
SSB_HUMAN	91	14899.4
GCN5_CANAX	157	14658.9
DIB1_CANAX	165	14265.6
MAP2_CANAX	200	14134.4
FOB64_005765_CANAX	165	14003.2
FOB64_000021_CANAX	172	13954.5
HSPA4_HUMAN	76	13803.3
NRPB1_CANAX	177	13586.5
COPS4_HUMAN	97	13504.7
FOB64_006219_CANAX	175	13494.2
PRKDC_HUMAN	78	13405.9
FOB64_004140_CANAX	198	13011.2
ACS1_CANAX	113	12943.9
PGM2L1_HUMAN	78	12851.6
UBA2_HUMAN	88	12662.9
DPYD_HUMAN	93	12629.6
FOB64_000777_CANAX	182	12551.5
FOB64_007019_CANAX	158	12481.8
THG1_CANAX	84	12471.1
FOB64_004410_CANAX	173	12324.9
FOB64_001976_CANAX	137	12296.2
PTBP1_HUMAN	92	12277.7
TXNRD1_HUMAN	70	12173.4
FOB64_006286_CANAX	206	12161.7
ADK2_CANAX	119	12117.9
SPS19_CANAX	116	12063.5
CDC37_HUMAN	83	11965.3
FOB64_000073_CANAX	134	11845.7
ACO1_HUMAN	96	11833.6
LAP3_HUMAN	86	11693.7
NXF1_HUMAN	82	11649.2
ILF2_HUMAN	81	11623.4
FOB64_002244_CANAX	147	11589.3
RANGAP1_HUMAN	92	11455.8
NOLC1_HUMAN	82	11274.1
GTR2_CANAX	113	11241.1
FOB64_003907_CANAX	107	11238.8
TOP1_HUMAN	82	11209.7
COASY_HUMAN	93	10814.1
GNAI3_HUMAN	82	10813.3
TP53_HUMAN	68	10765.9
PGLS_HUMAN	58	10543.7
OLA1_CANAX	172	10528.5
ALKBH8_HUMAN	80	10371.6
swoH_CANAX	182	10310.7
FOB64_004263_CANAX	150	10227
RPS10A_CANAX	197	10164.9
TBCA_HUMAN	81	10141.7
G3BP2_HUMAN	88	10086.4
AKT1_HUMAN	56	9941.32
CSNK2B_HUMAN	70	9814.97
EIF5B_HUMAN	64	9798.22
AIMP2_HUMAN	92	9726.24
BIRC3_HUMAN	62	9536.65
SNRPC_HUMAN	76	9391.16
CTNNB1_HUMAN	60	9308.55
FOB64_005856_CANAX	176	9258.21
HSPH1_HUMAN	57	9221.53
RSL1D1_HUMAN	69	9165.97
RSL24D1_HUMAN	76	8985.81
SUPT16H_HUMAN	70	8971.48
GPI_HUMAN	62	8949.75
STIP1_HUMAN	55	8946.57
COPS5_HUMAN	49	8882.35
UBC4_CANAX	151	8812.72
BRD4_HUMAN	32	8796.11
PFAS_HUMAN	91	8735.83
MDH1_HUMAN	57	8723.93
CNOT1_HUMAN	75	8706.28
GCH1_HUMAN	59	8644.36
BARD1_HUMAN	68	8631.69
CARS1_HUMAN	62	8621.59
UBQLN1_HUMAN	55	8583.32
FOB64_005276_CANAX	98	8506.8
KHDRBS1_HUMAN	66	8482.5
FOB64_006929_CANAX	144	8452.02
HUWE1_HUMAN	53	8443.39
FOB64_004262_CANAX	186	8275.19
XPO5_HUMAN	31	8263.64
MAP1LC3B_HUMAN	50	8167.42
HSPA4L_HUMAN	50	8152.19
FOB64_000545_CANAX	86	8083.04
PNPT1_HUMAN	87	8082.68
BCS1_CANAX	159	8047.47
EIF3H_HUMAN	48	8027.59
TPT1_HUMAN	49	7932.03
SUGT1_HUMAN	72	7909.9
NONO_HUMAN	63	7885.67
FOB64_006074_CANAX	149	7826.92
DCP2_HUMAN	67	7823.73
HNRNPA2B1_HUMAN	37	7820.77
FOB64_006895_CANAX	149	7792.89
FXR1_HUMAN	72	7780.41
RAD23A_HUMAN	75	7742.05
ATRX_HUMAN	72	7607.69
MSH2_HUMAN	72	7607.02
CDC73_HUMAN	66	7521.87
ZC3H15_HUMAN	88	7506.4
EIF3I_HUMAN	51	7485.27
VAMP7_HUMAN	51	7455.35
FOB64_001129_CANAX	129	7414.72
FOB64_004505_CANAX	146	7400.71
FAU_HUMAN	49	7386.66
FOB64_005606_CANAX	93	7377.93
ESR1_HUMAN	34	7365.71
TSG101_HUMAN	49	7302.74
PUM1_HUMAN	48	7298.78
HNRNPF_HUMAN	74	7297.31
PABPC1_HUMAN	51	7290.47
PTGES3_HUMAN	50	7285.64
FOB64_001854_CANAX	85	7280.22
AHSA1_HUMAN	77	7261.28
PEBP1_HUMAN	49	7233.31
HSPA12A_HUMAN	47	7226.91
CHD4_HUMAN	57	7214.7
RPA2_HUMAN	65	7199.14
YBX1_HUMAN	46	7127.63
ATXN1_HUMAN	43	7045.02
MLH1_HUMAN	65	6967.41
GTF2F2_HUMAN	63	6948.98
TIMELESS_HUMAN	53	6815.83
VHL_HUMAN	59	6810.15
SET_HUMAN	42	6805.59
FOB64_002876_CANAX	171	6791.88
NEDD4_HUMAN	66	6751.45
KDM6A_HUMAN	26	6697.14
HNRNPA1_HUMAN	36	6696.45
FOB64_003587_CANAX	115	6696.2
DNAJB1_HUMAN	43	6671.78
SUCLG1_CANAX	180	6631.29
CREBBP_HUMAN	53	6595.26
MIB2_HUMAN	64	6582.29
SUPT6H_HUMAN	65	6542.68
TBCB_HUMAN	55	6540.44
ACOT7_HUMAN	56	6517.9
TRIM25_HUMAN	47	6476.59
GTF2E2_HUMAN	56	6460.24
FOB64_003949_CANAX	122	6449.01
JUN_HUMAN	33	6443.21
NACA_HUMAN	46	6439.25
DHX9_HUMAN	33	6435.08
USP15_HUMAN	59	6423.52
MKKS_HUMAN	51	6417.89
RPB11_CANAX	70	6394.43
RAF1_HUMAN	54	6363.18
HSP10_CANAX	167	6348.49
PSMB4_HUMAN	44	6344.77
FBL_HUMAN	31	6338.63
SMARCAD1_HUMAN	26	6301.33
ANKRD45_HUMAN	43	6282.93
QARS1_HUMAN	52	6272.65
AGO3_HUMAN	51	6226.89
TXNL1_HUMAN	65	6154.08
EIF3B_HUMAN	49	6097.29
EP300_HUMAN	41	6092.65
MYC_HUMAN	34	6091.08
RPS25_HUMAN	47	6086.3
CTBP1_HUMAN	40	6027.85
KDM2A_HUMAN	53	5991.34
HNRNPK_HUMAN	42	5949.85
NUP98_HUMAN	63	5941.8
FOB64_004371_CANAX	130	5941.08
HLCS_HUMAN	66	5902.58
KSR1_HUMAN	49	5856.64
RPL22_HUMAN	47	5853.38
STAU1_HUMAN	41	5833.82
HKDC1_HUMAN	59	5830.31
RTF1_HUMAN	58	5820.31
SYNCRIP_HUMAN	47	5814.67
CRY1_HUMAN	56	5811.4
ESA1_CANAX	112	5795.61
TKTL1_HUMAN	45	5767.65
KPNB1_HUMAN	44	5741.32
EIF2AK4_HUMAN	50	5727.06
CUL3_HUMAN	28	5715.84
MAE1_CANAX	96	5714.82
HNRNPH1_HUMAN	30	5712.5
PPP1R9B_HUMAN	55	5688.77
CCNH_HUMAN	58	5677.27
PSMB5_HUMAN	37	5672.47
ANK3_HUMAN	45	5661.26
NUP153_HUMAN	48	5650.56
NOP2_HUMAN	27	5609.61
AKIRIN2_HUMAN	28	5608.82
RPL24_HUMAN	47	5572.39
HNRNPD_HUMAN	31	5565.03
NFKB1_HUMAN	37	5551
PRKCZ_HUMAN	34	5535.19
BLM_HUMAN	56	5475.98
RPL37A_HUMAN	43	5473.71
EIF4H_HUMAN	43	5462.9
EED_HUMAN	31	5456.52
PUM2_HUMAN	45	5456.02
APAF1_HUMAN	67	5437.26
TP53BP1_HUMAN	57	5424.12
EIF4G1_HUMAN	45	5422.4
TBK1_HUMAN	46	5391.73
RBM39_HUMAN	28	5376.42
GSK3B_HUMAN	37	5348.46
MAP1LC3A_HUMAN	36	5342.51
PAPALPHA_CANAX	141	5337.43
FOB64_002507_CANAX	102	5266.53
PBRM1_HUMAN	56	5243.31
UBR5_HUMAN	57	5239.08
FBXW7_HUMAN	26	5239
USP11_HUMAN	47	5229.25
COB_CANAX	31	5225.55
G3BP1_HUMAN	42	5223.92
IPO5_HUMAN	43	5208.6
HNRNPC_HUMAN	35	5190.1
NCL_HUMAN	33	5142.19
RC3H2_HUMAN	63	5134.41
SRSF1_HUMAN	38	5122.03
FOB64_006696_CANAX	92	5118.47
CHD1_HUMAN	22	5116.7
NUP54_HUMAN	55	5104.54
GTF2A2_HUMAN	46	5103.13
NAA40_HUMAN	39	5070.66
PGM2_HUMAN	44	5051.53
CASP3_HUMAN	37	5050.92
QNS1_CANAX	102	5015.24
FOB64_006690_CANAX	52	5002.25
EIF4E_HUMAN	41	4977.81
PELO_HUMAN	61	4929.88
SMT3_CANAX	119	4916.41
HNRNPM_HUMAN	29	4911.34
DERA_HUMAN	59	4910.47
SNW1_HUMAN	26	4906.53
DDX1_HUMAN	29	4897.86
TNPO1_HUMAN	37	4896.06
EIF3D_HUMAN	44	4878.8
SUMO1_HUMAN	31	4877.52
OTUB1_HUMAN	33	4840.86
NME7_HUMAN	37	4832.16
TTN_HUMAN	37	4832.07
POLR3C_HUMAN	51	4817.01
CUL2_HUMAN	28	4815.29
RTCA_HUMAN	50	4796.87
RIOK2_HUMAN	70	4765.88
CYLD_HUMAN	41	4754.49
EIF3A_HUMAN	43	4752.72
EIF3M_HUMAN	43	4736.23
PFN2_HUMAN	45	4735.37
SERBP1_HUMAN	47	4705.6
UBXN1_HUMAN	43	4678.44
HSP82_CANAX	96	4663.21
WWOX_HUMAN	34	4654.99
COPE_HUMAN	34	4640.14
SUB1_HUMAN	51	4615.38
MOV10_HUMAN	36	4609.04
AURKB_HUMAN	24	4604.27
HNRNPA3_HUMAN	28	4589.7
GCN1_HUMAN	38	4581.2
HNRNPAB_HUMAN	32	4576.03
GTF2H1_HUMAN	52	4567.94
RFK_HUMAN	60	4567.39
FLNA_HUMAN	30	4566.13
NBR1_HUMAN	42	4559.45
WRNIP1_HUMAN	41	4534.8
MYSM1_HUMAN	26	4525.26
RBBP7_HUMAN	25	4504.95
RPT5_CANAX	90	4492.38
ARCN1_HUMAN	35	4459.5
NPM1_HUMAN	30	4456.81
RAD23B_HUMAN	26	4436.58
GSTP1_HUMAN	34	4430.24
RIPK4_HUMAN	32	4395.49
RB1_HUMAN	50	4392.68
XPO6_HUMAN	21	4379.99
HDAC6_HUMAN	30	4379.12
FOB64_003691_CANAX	81	4377.79
ACTR10_HUMAN	27	4362.89
NQO1_HUMAN	41	4338.93
CHMP4B_HUMAN	28	4329.37
KDM6B_HUMAN	23	4324.9
DDX21_HUMAN	30	4318.99
PLEKHA4_HUMAN	24	4318.89
SF1_HUMAN	53	4304.17
CSDE1_HUMAN	50	4299.09
NAPRT_HUMAN	56	4297.41
BRCA1_HUMAN	26	4296.83
HAT1_HUMAN	22	4288.05
RPL29_HUMAN	38	4280.27
NTHL1_HUMAN	43	4274.88
SRSF2_HUMAN	24	4253.62
HDAC5_HUMAN	19	4245.23
TPK2_CANAX	75	4223.94
MDN1_HUMAN	60	4212.91
SETDB1_HUMAN	52	4186.93
SNRNP70_HUMAN	29	4184.06
H6PD_HUMAN	15	4180.58
GSTZ1_HUMAN	44	4147.37
CCNE1_HUMAN	19	4140.76
ADD3_HUMAN	34	4140.72
KIF14_HUMAN	26	4132.16
HNRNPU_HUMAN	23	4118.5
Etfb_CANAX	142	4110.15
TRA2B_HUMAN	29	4107.84
SGTA_HUMAN	51	4104.44
VIM_HUMAN	33	4102.99
TAF9_HUMAN	53	4091.19
IREB2_HUMAN	41	4077.59
YY1_HUMAN	16	4041.68
USP14_HUMAN	35	4023.04
PUS3_HUMAN	37	4005.41
cox2_CANAX	25	4001.81
VIRMA_HUMAN	24	4000.58
AIMP1_HUMAN	27	3997.96
CCNF_HUMAN	23	3966.07
AGO2_HUMAN	34	3963.78
TARDBP_HUMAN	50	3957.11
FOB64_001397_CANAX	93	3956.67
STAG2_HUMAN	23	3948.68
HELZ2_HUMAN	22	3945.79
CAPN1_HUMAN	43	3914.15
DDX60_HUMAN	40	3910.57
CHD6_HUMAN	56	3897.2
RPL28_HUMAN	39	3894.77
SNRPA1_HUMAN	29	3891.81
GNAI2_HUMAN	29	3882.01
RPL38_HUMAN	36	3857.64
PRC1_HUMAN	27	3851.91
BYSL_HUMAN	38	3850.64
PFN1_HUMAN	29	3833.32
TPM3_HUMAN	27	3820.45
UBA5_HUMAN	27	3819.77
BRCA2_HUMAN	53	3817.88
NOB1_HUMAN	49	3803.03
NUP35_HUMAN	44	3796.42
DICER1_HUMAN	34	3769.39
ANXA11_HUMAN	38	3768.35
RBKS_HUMAN	43	3766.58
PRMT2_HUMAN	33	3764.74
HNRNPR_HUMAN	28	3758.01
FUR1_CANAX	26	3750.21
ASC1_CANAX	90	3746.17
SMC6_HUMAN	18	3725.76
LMNA_HUMAN	23	3711.3
SNRPB_HUMAN	34	3705.06
DDX23_HUMAN	27	3700.74
HSPA14_HUMAN	22	3669.27
FOXO1_HUMAN	27	3624.99
CCND1_HUMAN	22	3618.52
IPO7_HUMAN	34	3615.4
FMR1_HUMAN	24	3595.04
NCBP2_HUMAN	27	3594.96
SNRPA_HUMAN	31	3594.59
SRSF6_HUMAN	28	3592.4
CAND1_HUMAN	33	3584.57
XIAP_HUMAN	25	3584.31
NCBP1_HUMAN	26	3575.32
NFKBIA_HUMAN	30	3559.04
HSPE1-MOB4_HUMAN	44	3558.91
EIF3E_HUMAN	38	3549.39
BRD8_HUMAN	39	3546.24
NR3C1_HUMAN	28	3533.78
PABPC4_HUMAN	30	3527.84
ALYREF_HUMAN	30	3517.09
CDK9_HUMAN	21	3515.93
PCMT1_HUMAN	30	3502.13
TNIP2_HUMAN	25	3498.72
ALDOA_HUMAN	35	3495.34
EIF5_HUMAN	34	3490.59
SNRPG_HUMAN	31	3488.47
GSN_HUMAN	24	3486.23
CHEK2_HUMAN	20	3474.91
TRRAP_HUMAN	20	3461.68
ARID4B_HUMAN	35	3430.49
ULK1_HUMAN	26	3416.7
NPEPPS_HUMAN	30	3411.66
HELB_HUMAN	35	3410.28
NDRG1_HUMAN	33	3405.28
MES1_CANAX	69	3404.39
NASP_HUMAN	28	3403.25
POLR2H_HUMAN	31	3399.54
GAK_HUMAN	28	3397.33
DDX46_HUMAN	27	3390.77
CUL7_HUMAN	33	3377.62
GPX1_HUMAN	31	3376.95
HINT1_HUMAN	39	3367.96
CCNA2_HUMAN	20	3359.06
HNRNPDL_HUMAN	27	3349.69
DNAJB6_HUMAN	25	3348.11
POLR3E_HUMAN	33	3335.09
PCYT1A_HUMAN	52	3330.32
RABEPK_HUMAN	28	3328.5
TCEA1_HUMAN	23	3318.49
MAPK6_HUMAN	25	3313.49
PHAX_HUMAN	44	3311.48
MEPCE_HUMAN	19	3301.6
TEP1_HUMAN	59	3300.61
KIF23_HUMAN	31	3297.76
CHEK1_HUMAN	20	3294.66
CAPZA1_HUMAN	27	3285.95
LRRK1_HUMAN	25	3274.17
ATAD2B_HUMAN	25	3272.88
GLRX_HUMAN	28	3268.17
KMT2B_HUMAN	16	3265.94
ST13_HUMAN	27	3260.69
ARPC5L_HUMAN	44	3258.1
CRM1_CANAX	91	3256.54
CDT1_HUMAN	43	3239.57
FOB64_005970_CANAX	51	3230.6
FABP5_HUMAN	28	3228.99
SKIC2_HUMAN	25	3214.82
DHX36_HUMAN	23	3210.59
NSD3_HUMAN	46	3198.82
TIGAR_HUMAN	34	3198.08
CBL_HUMAN	42	3197.09
ACLY_HUMAN	27	3193.96
HNRNPA0_HUMAN	27	3192.73
PMPCA_HUMAN	54	3178.77
UXT_HUMAN	27	3175.56
SF3B3_HUMAN	25	3170.6
PLK1_HUMAN	19	3168.77
AURKA_HUMAN	31	3165.54
FOB64_005305_CANAX	99	3160.92
ERH_HUMAN	22	3149.53
CHUK_HUMAN	27	3146.26
FXR2_HUMAN	23	3145.2
LMNB2_HUMAN	19	3136.94
ITSN2_HUMAN	40	3129.78
CLPP_HUMAN	53	3126.61
APEX1_HUMAN	23	3126.28
LGALS9_HUMAN	34	3124.69
ARHGDIA_HUMAN	26	3110.43
RNF31_HUMAN	40	3108.47
RRP1B_HUMAN	23	3106.77
GPM1_CANAX	48	3083.73
SF3A2_HUMAN	43	3078.43
SNRPB2_HUMAN	27	3075.97
TUBG1_HUMAN	31	3073.64
RALY_HUMAN	21	3067.21
NAA50_HUMAN	33	3063.86
HDLBP_HUMAN	32	3063.03
KAT2B_HUMAN	20	3062.23
DPYSL2_HUMAN	26	3061.72
ZC3H14_HUMAN	25	3054.93
ELP3_CANAX	34	3052.67
POLA1_HUMAN	23	3052.35
TAGLN_HUMAN	28	3048.79
RPS10-NUDT3_HUMAN	38	3048.48
NIFK_HUMAN	24	3044.15
PLS3_HUMAN	22	3041.42
FOB64_006771_CANAX	105	3033.54
STAT3_HUMAN	26	3032.33
DDX31_HUMAN	20	3028.12
SNRPF_HUMAN	33	3017.63
RBBP6_HUMAN	32	3015
FBXO32_HUMAN	28	3011.14
PDCD11_HUMAN	22	3010.91
NFX1_HUMAN	45	3005.09
FKBP15_HUMAN	26	3001.18
GIT1_HUMAN	33	2992.17
CKA2_CANAX	97	2987.08
NEK2_HUMAN	17	2985.59
PRPF19_HUMAN	33	2985.4
XPOT_HUMAN	23	2980.08
FOB64_000480_CANAX	108	2971.02
IFI16_HUMAN	22	2965.81
ARPC2_HUMAN	20	2957.98
POLR1E_HUMAN	20	2952.41
MSH6_HUMAN	22	2949.48
HELLS_HUMAN	24	2937.82
SNRPD1_HUMAN	32	2929.67
AK5_HUMAN	35	2923.75
EZH1_HUMAN	38	2918.84
POL3_CANAX	103	2905.61
AKR1C4_HUMAN	42	2902.4
ABL1_HUMAN	20	2900.12
DDX28_HUMAN	22	2890.45
RPRD1B_HUMAN	34	2889.03
MPHOSPH10_HUMAN	22	2885.94
KYAT1_HUMAN	31	2884.66
MAP2K2_HUMAN	24	2881.58
EIF3J_HUMAN	26	2879.46
DNAJC2_HUMAN	21	2878.69
DDX50_HUMAN	24	2874.71
SMC2_HUMAN	22	2873.45
BLVRB_HUMAN	33	2873.24
RPL30_HUMAN	19	2871.05
ZCCHC7_HUMAN	17	2870.36
XRCC6_HUMAN	23	2865.49
DCTN1_HUMAN	22	2860.13
LMNB1_HUMAN	21	2856.72
CA2_HUMAN	37	2850.28
IPO4_HUMAN	29	2847.54
BAG3_HUMAN	17	2845.29
CALCOCO2_HUMAN	22	2840.89
YRDC_HUMAN	35	2837.19
CBR1_HUMAN	30	2835.35
RIGI_HUMAN	27	2829.84
RNF123_HUMAN	25	2829.02
GNL3_HUMAN	22	2827.54
RRP7A_HUMAN	16	2800.67
RTCB_HUMAN	21	2797.38
TAF6_HUMAN	38	2796.98
HEATR1_HUMAN	25	2796.75
XAB2_HUMAN	23	2788.75
HSPB1_HUMAN	26	2786.49
HDGFL2_HUMAN	20	2786.19
SLF1_HUMAN	19	2785.2
ACTN1_HUMAN	22	2780.86
MAGOH_HUMAN	25	2780.44
RAD21_HUMAN	22	2779.95
EEF1D_HUMAN	25	2777.79
WDR5_HUMAN	26	2777.01
AP3B1_HUMAN	19	2771.75
DDX17_HUMAN	23	2759.94
ATG3_HUMAN	23	2757.83
SAP18_HUMAN	24	2756.62
POLR1F_HUMAN	20	2753.57
RAD54B_HUMAN	22	2746.33
STRAP_HUMAN	33	2746.13
DCTN2_HUMAN	20	2741.51
COX5B_HUMAN	49	2736.28
OPTN_HUMAN	21	2733.98
RPS6KB2_HUMAN	24	2728.94
DNMT1_HUMAN	21	2718.66
FTH1_HUMAN	29	2690.66
GRWD1_HUMAN	23	2690.07
TIA1_HUMAN	21	2688.6
GSTO1_HUMAN	23	2683
BMI1_HUMAN	19	2680.09
RPL8B_CANAX	54	2678.35
MCM9_HUMAN	41	2673.92
SMC1B_HUMAN	21	2671.59
EXOSC3_HUMAN	26	2669.15
ZC3H18_HUMAN	22	2665
PNKP_HUMAN	34	2662.86
CACYBP_HUMAN	41	2662.68
SRSF7_HUMAN	24	2655.74
RIDA_HUMAN	19	2652.87
NUP50_HUMAN	16	2650.67
FOB64_003401_CANAX	98	2650.56
MTR_HUMAN	42	2645.75
SRSF3_HUMAN	26	2639.8
CaJ7.0043_CANAX	38	2639.75
UTP18_HUMAN	21	2639.57
PRPF3_HUMAN	50	2634.32
FOB64_006497_CANAX	25	2632.18
MYBBP1A_HUMAN	35	2619.58
PABPC3_HUMAN	24	2616.17
TPM2_HUMAN	22	2614.59
UTP14A_HUMAN	23	2600.35
SP1_HUMAN	17	2594.87
CDKN1B_HUMAN	15	2592.74
ATG5_HUMAN	20	2588.35
SEC31A_HUMAN	25	2587.4
CDC14A_HUMAN	16	2581.09
SRP19_HUMAN	32	2577.55
NSUN2_HUMAN	23	2564.8
MATR3_HUMAN	22	2562.37
FOS_HUMAN	16	2560.54
MDE1_CANAX	76	2555.34
NAP1L4_HUMAN	18	2552.51
SMC4_HUMAN	21	2551.75
ADAR_HUMAN	32	2548.24
RPF2_HUMAN	22	2541.33
EIF4E2_HUMAN	32	2528.21
CWC27_HUMAN	21	2526.44
EXOSC4_HUMAN	33	2520.2
SRSF10_HUMAN	22	2515.33
NUPR1_HUMAN	19	2512.86
ELAVL1_HUMAN	17	2512.48
COQ9_HUMAN	48	2511.86
NME8_HUMAN	19	2508.2
TBPL1_HUMAN	24	2505.53
PRMT5_HUMAN	32	2504.7
LONP1_HUMAN	45	2504.56
SRPK2_HUMAN	24	2503.86
FTSJ3_HUMAN	21	2502.06
CCNA1_HUMAN	18	2499.46
CENPC_HUMAN	32	2488.18
DCAF13_HUMAN	22	2487.56
ATP6V1H_HUMAN	21	2479.92
CREB1_HUMAN	16	2468.28
NUP107_HUMAN	21	2467.07
LEMD3_HUMAN	15	2464.01
SSBP1_HUMAN	50	2462.77
SRSF5_HUMAN	20	2461.57
BIRC5_HUMAN	18	2460.55
SEPTIN7_HUMAN	24	2450.96
RBL2_HUMAN	34	2445.09
IL1B_HUMAN	22	2440.2
UBASH3B_HUMAN	20	2436.06
WDR1_HUMAN	21	2426.84
GNB2_HUMAN	23	2422.44
COX5A_HUMAN	46	2415.42
KIF1B_HUMAN	21	2413.41
MYO10_HUMAN	25	2412.1
SMAD3_HUMAN	16	2405.43
FYN_HUMAN	20	2385.3
ALD5_CANAX	48	2380.15
EEF1E1_HUMAN	18	2378.58
RTTN_HUMAN	25	2373.57
SND1_HUMAN	27	2369.91
WRN_HUMAN	21	2362.48
WDR77_HUMAN	23	2361.08
DYNC1I2_HUMAN	21	2360.97
RPS12_CANAX	45	2358.03
TSN_HUMAN	21	2356.6
BAZ1B_HUMAN	21	2355.96
MAGOHB_HUMAN	22	2348.08
SRP14_HUMAN	32	2345.71
EZH2_HUMAN	20	2344.76
AATF_HUMAN	18	2344.31
PABPN1_HUMAN	20	2343.05
TXNIP_HUMAN	22	2339.53
TRA2A_HUMAN	22	2335.52
AK7_HUMAN	38	2335.11
KIF5B_HUMAN	21	2330.69
UTP6_HUMAN	20	2328.67
OASL_HUMAN	18	2321.21
LDHB_HUMAN	16	2312.31
CAPZB_HUMAN	22	2311.99
DNAJB2_HUMAN	21	2303.57
RECQL4_HUMAN	18	2298.48
SRXN1_HUMAN	22	2295.56
RNF2_HUMAN	18	2291.58
PRKCI_HUMAN	17	2280.45
TRUB1_HUMAN	23	2280.22
RNASEL_HUMAN	25	2273.77
ACY1_HUMAN	31	2271.92
CDKN1A_HUMAN	16	2267.19
KNL1_HUMAN	27	2264.84
UTP11_HUMAN	22	2264.15
CSNK1A1_HUMAN	18	2261.37
DNAJB4_HUMAN	21	2259.17
PSME3_HUMAN	23	2257.96
CHD7_HUMAN	22	2257.69
MAP2K7_HUMAN	12	2254.97
MORF4L1_HUMAN	21	2249.96
JARID2_HUMAN	16	2246.21
SRSF9_HUMAN	21	2241.03
ATP6V0B_HUMAN	27	2239.15
XPO7_HUMAN	16	2234.85
STAT1_HUMAN	19	2218.33
BNA1_CANAX	46	2217.42
PPM1B_HUMAN	23	2216.67
QKI_HUMAN	31	2216.47
MLLT1_HUMAN	42	2216.33
FOB64_003400_CANAX	93	2215.38
PIK3CD_HUMAN	37	2214.42
MYBL2_HUMAN	18	2213.7
ARRB2_HUMAN	21	2212.78
UBQLN4_HUMAN	12	2212.08
TRMT112_HUMAN	21	2211.26
EBNA1BP2_HUMAN	24	2210.58
LIN28A_HUMAN	24	2199.8
KDM4B_HUMAN	15	2197.48
RAD17_HUMAN	17	2193.18
PRPF40A_HUMAN	21	2191.19
RING1_HUMAN	32	2186
TCEA2_HUMAN	17	2179.94
RNPS1_HUMAN	21	2176.78
COMT_HUMAN	22	2172.59
ISG15_HUMAN	21	2169.62
TONSL_HUMAN	12	2165.77
AR_HUMAN	20	2165.73
MTPAP_HUMAN	27	2164.38
TRIM28_HUMAN	12	2161.75
TAF12_HUMAN	44	2159.65
NFKBIE_HUMAN	23	2158.77
SIN3A_HUMAN	13	2154.92
USP9X_HUMAN	19	2151.66
AKR1C3_HUMAN	24	2143.3
SF3A1_HUMAN	22	2141.93
PLK2_HUMAN	14	2140.5
GAS7_HUMAN	18	2136.53
RPS29_HUMAN	17	2131.4
FLII_HUMAN	28	2131.35
PEX6_HUMAN	21	2128.65
BCCIP_HUMAN	21	2124.52
UBE4B_HUMAN	20	2123.43
NBN_HUMAN	18	2121.4
NCS6_CANAX	18	2118.38
SDAD1_HUMAN	20	2118.27
DNTTIP2_HUMAN	19	2116.53
EIF3F_HUMAN	18	2114.46
KLC2_HUMAN	16	2111.62
FBH1_HUMAN	19	2109.01
NCK1_HUMAN	16	2096.83
KIF4A_HUMAN	18	2089.86
BRD7_HUMAN	17	2087.11
PHF21A_HUMAN	18	2086.79
FOB64_004546_CANAX	92	2086.44
KEAP1_HUMAN	23	2083.24
HNRNPH3_HUMAN	20	2082.11
AIF1_HUMAN	18	2077.04
SMURF1_HUMAN	22	2076.67
SMAD2_HUMAN	17	2069.38
CNOT3_HUMAN	23	2069.22
TIMM44_HUMAN	37	2066.46
KDM2B_HUMAN	14	2064.96
NGLY1_HUMAN	24	2064.53
NME9_HUMAN	19	2062.96
DOT1L_HUMAN	34	2055.83
LTN1_HUMAN	21	2053.5
HSD17B14_HUMAN	36	2049.38
PRKCD_HUMAN	18	2047.66
ALB_HUMAN	14	2047.36
CRY2_HUMAN	22	2045.08
HERC2_HUMAN	18	2044.88
MAPRE1_HUMAN	23	2044.36
RAD51D_HUMAN	19	2043.42
RBM34_HUMAN	20	2043.05
LDHA_HUMAN	19	2033.21
MEF2D_HUMAN	23	2026.41
RBM19_HUMAN	14	2023.1
RIN3_HUMAN	22	2021.06
COPS2_HUMAN	21	2010.56
NOP53_HUMAN	19	1998.03
NCAPH_HUMAN	19	1997.97
FOXO3_HUMAN	24	1994.84
DCTN3_HUMAN	14	1991.5
POLR3D_HUMAN	18	1990.57
CAMK4_HUMAN	19	1990.32
POU5F1_HUMAN	19	1989.6
STXBP1_HUMAN	17	1987.86
NOC3L_HUMAN	19	1986.95
MED12_HUMAN	13	1986.22
BRD3_HUMAN	15	1984.7
DNAJC5_HUMAN	19	1971.68
SMG1_HUMAN	15	1971.58
RBM8A_HUMAN	21	1969.46
MDC1_HUMAN	18	1968.79
KIF5C_HUMAN	17	1965.68
USP1_HUMAN	18	1965.02
SREK1_HUMAN	13	1959.82
EMC1_HUMAN	9	1959.16
NSUN5_HUMAN	19	1958.78
STX1A_HUMAN	15	1953.46
XRCC5_HUMAN	25	1953
UBE2O_HUMAN	20	1951.15
GMPS_HUMAN	19	1947
SRPRB_HUMAN	12	1946.06
NOL10_HUMAN	18	1943.49
PRKCE_HUMAN	20	1939
H1-2_HUMAN	15	1937.3
CLIC4_HUMAN	17	1934.94
POMP_HUMAN	19	1933.79
NFE2L2_HUMAN	22	1929.79
VRK1_HUMAN	17	1928.4
KAR2_CANAX	17	1927.85
CDYL_HUMAN	12	1924.94
HDAC9_HUMAN	11	1923.51
ARID2_HUMAN	33	1921.81
HDAC7_HUMAN	11	1921.31
RNF20_HUMAN	14	1920.03
SNAI1_HUMAN	13	1917.84
RRP12_HUMAN	20	1917.81
RELA_HUMAN	14	1911.56
NAA15_HUMAN	21	1910.76
USP8_HUMAN	32	1908.56
XPC_HUMAN	38	1905.35
CRYL1_HUMAN	24	1904.31
KIF11_HUMAN	19	1903.59
EDC3_HUMAN	25	1902.42
SLU7_HUMAN	32	1901.46
RTRAF_HUMAN	20	1899.16
ANP32A_HUMAN	17	1898.17
NOL6_HUMAN	23	1897.13
SIN3B_HUMAN	11	1897.11
BIRC2_HUMAN	17	1896.47
PRPF4B_HUMAN	14	1895.78
AKR1C1_HUMAN	29	1892.78
LCP1_HUMAN	20	1889.45
TMPO_HUMAN	17	1886.64
CFL1_HUMAN	15	1886.01
ASF1A_HUMAN	18	1883.18
DYRK2_HUMAN	19	1883.15
HELQ_HUMAN	33	1881.23
PUF60_HUMAN	19	1879.12
CPSF1_HUMAN	17	1878.46
IRAK1_HUMAN	17	1876.24
RBM3_HUMAN	21	1875.31
MTG2_HUMAN	40	1872.1
ELOC_HUMAN	18	1867.55
ZCCHC17_HUMAN	21	1867.53
NUP160_HUMAN	15	1867.45
IKBKG_HUMAN	18	1865.07
IMPA1_HUMAN	27	1859.26
PSMD10_HUMAN	14	1857.91
HTATSF1_HUMAN	19	1852.55
CTDP1_HUMAN	19	1849.64
DISC1_HUMAN	18	1843.93
TRAF6_HUMAN	19	1843.5
MAP1LC3B2_HUMAN	15	1842.78
COPZ1_HUMAN	18	1838.62
NCOA5_HUMAN	14	1838.4
NUDT3_HUMAN	23	1838.39
ARFGEF2_HUMAN	17	1837.83
CHRAC1_HUMAN	11	1835.26
HPGDS_HUMAN	11	1835.14
CPSF3_HUMAN	24	1833.17
MDM2_HUMAN	19	1832.66
IRF3_HUMAN	16	1831.96
TMED2_HUMAN	18	1831.1
NUP205_HUMAN	17	1827.55
MAPT_HUMAN	13	1825.17
PAFAH1B1_HUMAN	17	1824.03
RBMX_HUMAN	21	1821.96
POLI_HUMAN	10	1818.93
TEX10_HUMAN	18	1814.98
SPAG6_HUMAN	17	1811.59
CSNK1E_HUMAN	19	1809.23
SIRT7_HUMAN	18	1807.6
POLR2D_HUMAN	23	1806.59
BLVRA_HUMAN	25	1806.46
TEF1a_CANAX	82	1803.8
CBX1_HUMAN	11	1803.63
CEBPZ_HUMAN	17	1801.64
VAMP2_HUMAN	14	1797.74
AKT2_HUMAN	22	1797.6
SH2D3C_HUMAN	14	1794.71
TAX1BP1_HUMAN	30	1791.81
PNO1_HUMAN	23	1791.59
RPP38_HUMAN	23	1791.2
ASF1B_HUMAN	17	1787.9
LPIN1_HUMAN	27	1787.45
ATP6V1C1_HUMAN	16	1783.36
RRP1_HUMAN	18	1782.72
DMTF1_HUMAN	14	1774.03
FOB64_004570_CANAX	71	1772.45
CLPX_HUMAN	40	1772.31
SPRTN_HUMAN	16	1766.72
BDH2_HUMAN	24	1761.87
RCC2_HUMAN	17	1761.27
POLR3K_HUMAN	10	1755.15
CLIP1_HUMAN	16	1752.78
TRMT2A_HUMAN	24	1751.19
KMT2C_HUMAN	13	1749.64
MAD2L1_HUMAN	25	1749.42
BRD2_HUMAN	13	1747.75
PLAA_HUMAN	40	1745.44
KIF20B_HUMAN	15	1739.94
RMI1_HUMAN	37	1738.18
UCHL5_HUMAN	22	1733.81
CCNC_HUMAN	14	1733.5
ERCC6_HUMAN	22	1723.91
NPLOC4_HUMAN	14	1722.23
YEATS2_HUMAN	15	1719.42
DBT_HUMAN	39	1717.79
IFIT2_HUMAN	16	1716.71
PFDN2_HUMAN	19	1713.12
POLH_HUMAN	13	1712.92
ACOT1_HUMAN	26	1710.26
INPPL1_HUMAN	18	1706.43
TSR1_HUMAN	22	1701.91
RPA1_HUMAN	21	1700.56
PFDN5_HUMAN	17	1700.01
ATG13_HUMAN	23	1698.98
PDS5A_HUMAN	19	1698.85
ADD1_HUMAN	18	1697.44
SRRT_HUMAN	18	1696.52
DUSP23_HUMAN	15	1696.41
FOB64_005779_CANAX	75	1695.72
CORO1B_HUMAN	24	1694.39
EXOSC5_HUMAN	18	1690.7
ANXA6_HUMAN	15	1689.47
MFAP1_HUMAN	17	1685.01
UBD_HUMAN	22	1683.91
RBM5_HUMAN	11	1683.29
EIF2AK2_HUMAN	29	1681.45
CCNT1_HUMAN	18	1681.39
DPYSL3_HUMAN	21	1678.62
TUBE1_HUMAN	17	1676.72
CASC3_HUMAN	24	1675.68
ERMN_HUMAN	17	1675.25
KLHDC1_HUMAN	23	1669.77
TXNRD2_HUMAN	41	1668.71
HNRNPA1L2_HUMAN	19	1667.49
GNE_HUMAN	31	1666.73
HDAC4_HUMAN	11	1664.99
MAP4K4_HUMAN	12	1664.13
MTRR_HUMAN	25	1662.26
FOB64_006854_CANAX	67	1658.27
EIF3C_HUMAN	14	1657.98
DUSP12_HUMAN	10	1657.62
ARRB1_HUMAN	12	1657.29
AGO4_HUMAN	19	1657.04
MOCS3_HUMAN	23	1655.38
EHBP1_HUMAN	13	1654.58
BTRC_HUMAN	35	1654.58
TOLLIP_HUMAN	15	1650.31
STXBP3_HUMAN	13	1645.06
FBLL1_HUMAN	25	1641.13
DDB1_HUMAN	20	1639.89
CASP1_HUMAN	16	1638.95
SMARCA4_HUMAN	9	1636.11
UBASH3A_HUMAN	16	1629.51
FOB64_000591_CANAX	15	1629.33
CDC25C_HUMAN	13	1629.25
RCHY1_HUMAN	13	1625.05
GTF2E1_HUMAN	16	1618.98
XRCC3_HUMAN	17	1617.19
KAT6A_HUMAN	15	1615.56
PGI1_CANAX	39	1615.35
UTP14C_HUMAN	17	1610.07
LSM8_HUMAN	17	1609.65
TRAF2_HUMAN	17	1608.03
PPP1R10_HUMAN	12	1607.05
IWS1_HUMAN	17	1599.74
DAZAP1_HUMAN	24	1599.64
TTC4_HUMAN	15	1599.31
KDM5A_HUMAN	15	1598.38
KDM5B_HUMAN	15	1598.38
USO1_HUMAN	16	1597.52
NR2C2_HUMAN	12	1596.47
INTS13_HUMAN	14	1596.32
CORO1A_HUMAN	22	1594.87
ACTN2_HUMAN	16	1589.62
RPA3_HUMAN	22	1589.26
PSMC3IP_HUMAN	30	1587.32
HTB2_CANAX	81	1586.06
UNK_HUMAN	17	1585.87
EWSR1_HUMAN	15	1583.41
CCNB1_HUMAN	13	1582.03
UBC2_CANAX	79	1580.92
SNRPN_HUMAN	17	1578.88
CIT_HUMAN	15	1577.65
CCNG2_HUMAN	15	1575.24
RPL36A_HUMAN	26	1572.76
TSC2_HUMAN	21	1572.4
DHX30_HUMAN	23	1572.04
SUV39H2_HUMAN	16	1571.87
SENP1_HUMAN	10	1566.9
CCDC8_HUMAN	22	1563.06
PPARG_HUMAN	12	1562.38
MYH3_HUMAN	16	1559.28
USP4_HUMAN	20	1558.75
NEMF_HUMAN	21	1557.87
SFPQ_HUMAN	15	1552.44
BOLA2B_HUMAN	22	1551.41
UBQLN2_HUMAN	14	1550.69
RNF14_HUMAN	21	1547.28
FOXK1_HUMAN	10	1545.62
GTF2A1_HUMAN	13	1545.53
PIAS3_HUMAN	21	1543.85
DCPS_HUMAN	21	1541.61
CASP8_HUMAN	16	1541.02
CIRBP_HUMAN	19	1540.99
NEP1_CANAX	61	1538.63
CWC22_HUMAN	16	1537.59
CHMP4A_HUMAN	13	1537.12
RPL28_CANAX	56	1534.34
NOL11_HUMAN	16	1530.01
TUBGCP3_HUMAN	29	1529.84
SUPT5H_HUMAN	8	1528.85
UBR1_HUMAN	18	1528.76
RRP8_HUMAN	16	1527.4
NFKB2_HUMAN	12	1523.4
MX2_HUMAN	13	1523.23
CPSF6_HUMAN	17	1522.75
FUS_HUMAN	18	1518.85
SF3A3_HUMAN	24	1517.37
GTF2F1_HUMAN	16	1517.1
DIS3L2_HUMAN	27	1514.55
MAP1A_HUMAN	15	1513.04
HMGA2_HUMAN	13	1510.78
RAP2C_HUMAN	13	1508.7
CKB_HUMAN	10	1507.39
BUB1_HUMAN	15	1507.36
NCOR2_HUMAN	9	1504.94
BRCC3_HUMAN	22	1501.01
DUSP16_HUMAN	16	1500.44
IKBKB_HUMAN	18	1496.95
TXNDC9_HUMAN	12	1496.86
FABP3_HUMAN	22	1493.68
EGLN1_HUMAN	19	1490.79
TOX4_HUMAN	12	1490.63
RLI1_CANAX	56	1490.37
PTK2B_HUMAN	19	1488.16
CASP7_HUMAN	14	1485
ENOPH1_HUMAN	22	1484.81
RAI14_HUMAN	14	1483.78
CASP6_HUMAN	11	1482.43
DROSHA_HUMAN	10	1481.67
SSH3_HUMAN	17	1477.22
POLE2_HUMAN	16	1476.57
CSE1L_HUMAN	11	1474.67
CSK_HUMAN	14	1471.59
SUV39H1_HUMAN	16	1470.41
TFE3_HUMAN	21	1466.96
NMRAL1_HUMAN	16	1464.79
NIPBL_HUMAN	11	1464.72
PPP1R12C_HUMAN	14	1461.58
API5_HUMAN	14	1458.65
MYO1E_HUMAN	15	1455.79
SF3B6_HUMAN	18	1455.66
CRABP2_HUMAN	15	1453.62
EML4_HUMAN	15	1452.96
PLK3_HUMAN	11	1452.59
THRAP3_HUMAN	10	1452.36
ROCK2_HUMAN	14	1451.6
LGALS3_HUMAN	18	1449.01
CTNNBL1_HUMAN	17	1448.78
BCAS2_HUMAN	16	1446.91
FOB64_005502_CANAX	57	1444.69
GSTM1_HUMAN	10	1443.44
UPF2_HUMAN	21	1443.43
MTPN_HUMAN	17	1441.96
GPS1_HUMAN	16	1438.45
POLR1D_HUMAN	24	1437.72
PIDD1_HUMAN	20	1437.19
NUDT11_HUMAN	17	1433.79
CRNKL1_HUMAN	14	1433.59
GTF2H3_HUMAN	32	1432.79
CHD2_HUMAN	19	1432.14
GLN1_CANAX	46	1431.26
TAF1L_HUMAN	12	1430.36
YAP1_HUMAN	12	1427.23
SENP3_HUMAN	18	1426.52
SEPSECS_HUMAN	25	1426.39
CLTA_HUMAN	14	1425.59
SGK1_HUMAN	20	1423.72
LTA4H_HUMAN	27	1423.7
PUP1_CANAX	56	1418.84
DAXX_HUMAN	25	1415.32
NOP16_HUMAN	18	1414.62
DDAH2_HUMAN	17	1413.74
AKAP13_HUMAN	18	1413.46
MED25_HUMAN	8	1403.82
NUDT10_HUMAN	17	1403.64
WAC_HUMAN	14	1403.08
SAFB_HUMAN	13	1402.21
PJA2_HUMAN	13	1400.54
USP7_HUMAN	16	1397.85
WDR82_HUMAN	16	1397.18
CARM1_HUMAN	20	1395.71
ERB1_CANAX	39	1395.37
FSCN1_HUMAN	14	1395.2
PCBP2_HUMAN	23	1391.22
PRKRA_HUMAN	15	1389.27
ASH2L_HUMAN	16	1388.02
INCENP_HUMAN	13	1385.99
TMED9_HUMAN	11	1384.74
MED13_HUMAN	9	1384.67
DGUOK_HUMAN	39	1384.04
SIAH2_HUMAN	13	1382.37
ABT1_HUMAN	15	1382.35
GTF2B_HUMAN	18	1381.89
fal1_CANAX	69	1379.08
KHSRP_HUMAN	15	1377.36
AGO1_HUMAN	23	1377.14
UTP3_HUMAN	21	1370.47
KIF3A_HUMAN	13	1368.59
RHPN2_HUMAN	11	1366.98
CDYL2_HUMAN	9	1365.23
SHARPIN_HUMAN	17	1364.1
NFATC1_HUMAN	25	1358.12
KMT5A_HUMAN	14	1357.8
SIRT6_HUMAN	8	1356.53
RRP9_HUMAN	19	1356.34
CTCF_HUMAN	8	1354.36
PARD3_HUMAN	14	1353.06
FANCA_HUMAN	14	1351.69
NAP1L1_HUMAN	8	1351.05
PHB2_CANAX	43	1348.91
RBX1_HUMAN	12	1347.92
NOL9_HUMAN	26	1346.95
NOS2_HUMAN	9	1346.62
CAPNS1_HUMAN	18	1344.17
MAP3K14_HUMAN	17	1341.61
LSG1_HUMAN	23	1340.57
MAF1_HUMAN	13	1338.19
SRPK1_HUMAN	25	1337.08
E2F8_HUMAN	35	1331.67
APPBP2_HUMAN	8	1330.09
ZYX_HUMAN	14	1329.45
CDC20B_HUMAN	13	1327.39
KAT8_HUMAN	14	1327.23
GSTM4_HUMAN	19	1326.95
RBBP5_HUMAN	14	1326.28
RAD52_HUMAN	16	1324.6
EIF3L_HUMAN	14	1323.66
ESR2_HUMAN	11	1323.37
TAF5L_HUMAN	12	1321.92
UTP4_HUMAN	15	1321.04
LDHC_HUMAN	11	1319.47
TES_HUMAN	18	1315.18
MAP2K1_HUMAN	9	1314.33
E2F4_HUMAN	14	1312.92
CTR9_HUMAN	8	1312.81
NPM3_HUMAN	21	1312.66
MED4_HUMAN	14	1311.02
WDR43_HUMAN	18	1309.11
KDM5C_HUMAN	16	1307.35
EEFSEC_HUMAN	14	1303.84
PTPN11_HUMAN	15	1303.72
SHANK1_HUMAN	13	1301.07
RBM14_HUMAN	16	1296.86
VPS39_HUMAN	13	1296.15
CSNK1G3_HUMAN	11	1295.72
SMARCB1_HUMAN	7	1294.93
SP100_HUMAN	28	1294.51
UBE3A_HUMAN	14	1293.8
FOB64_003200_CANAX	53	1293.76
MYD88_HUMAN	13	1292.64
MED26_HUMAN	15	1291.67
MIB1_HUMAN	19	1291
RBBP8_HUMAN	13	1290.86
GMNN_HUMAN	15	1290.27
POLE4_HUMAN	13	1290.2
CHMP2B_HUMAN	13	1289.85
DUSP1_HUMAN	9	1289.22
NCOA3_HUMAN	23	1280.82
SMURF2_HUMAN	11	1280.8
MAP3K7_HUMAN	10	1280.7
TSR3_HUMAN	20	1279.91
RBP7_HUMAN	14	1279.1
EIF3G_HUMAN	14	1279.09
E2F1_HUMAN	14	1277.8
EML2_HUMAN	15	1277.52
ACOT13_HUMAN	22	1277.28
NACA2_HUMAN	24	1276.12
FLNC_HUMAN	12	1274.22
MPST_HUMAN	20	1273.35
THOC2_HUMAN	18	1272.89
NSD2_HUMAN	17	1271.11
RANBP17_HUMAN	8	1270.9
ASB8_HUMAN	14	1270.78
ACTN4_HUMAN	12	1266.53
IFIT1_HUMAN	18	1266.15
TRIM21_HUMAN	17	1265.84
RIPK1_HUMAN	12	1265.17
PIH1D1_HUMAN	20	1260.99
GNAI1_HUMAN	10	1260.44
ARIH1_HUMAN	13	1260.08
CACNA1E_HUMAN	5	1259.58
PSPC1_HUMAN	14	1259.5
NNT_HUMAN	36	1253.95
TRIP10_HUMAN	12	1252.95
NHLRC2_HUMAN	19	1252.39
ASAP1_HUMAN	10	1251.71
TRIO_HUMAN	12	1251.29
PUM3_HUMAN	18	1250.39
FANCD2_HUMAN	10	1250.34
ABHD14A-ACY1_HUMAN	24	1247.62
REV1_HUMAN	14	1246.89
DCP1A_HUMAN	33	1246.42
SPAG1_HUMAN	15	1244.52
PCNT_HUMAN	12	1243.2
TDRD7_HUMAN	16	1242.98
SETD1B_HUMAN	15	1237.92
ZNF330_HUMAN	10	1237.1
TRIP12_HUMAN	13	1235.86
ESPL1_HUMAN	14	1234.21
SMAD4_HUMAN	14	1233.36
NFKBIB_HUMAN	13	1230.16
LTV1_HUMAN	18	1229.15
CRK_HUMAN	14	1228.68
PCSK9_HUMAN	13	1227.29
PCK2_HUMAN	30	1226.54
TRIM27_HUMAN	7	1224.72
SHOC2_HUMAN	15	1224.55
RAD9A_HUMAN	14	1222.37
RNF7_HUMAN	27	1221.91
MED14_HUMAN	16	1221.58
HOMER1_HUMAN	18	1220.43
FLNB_HUMAN	15	1219.03
TGM2_HUMAN	15	1216.84
AP5M1_HUMAN	11	1216.59
MYO7A_HUMAN	13	1214.82
BAZ1A_HUMAN	12	1213.62
SNCA_HUMAN	9	1212.08
PTMA_HUMAN	14	1211.8
AKIRIN1_HUMAN	13	1209.73
CCNK_HUMAN	15	1209.43
LSM10_HUMAN	14	1207.09
PRKAR2A_HUMAN	17	1205.03
LEO1_HUMAN	16	1205.03
CDCA7_HUMAN	12	1204.02
MED1_HUMAN	12	1203.34
ATAD5_HUMAN	15	1201.92
SKP2_HUMAN	11	1201.17
FUBP1_HUMAN	13	1199.9
NUP155_HUMAN	18	1199.52
TERF1_HUMAN	13	1199.19
NUDC_HUMAN	13	1197.84
DDX41_HUMAN	13	1195.64
EGR1_HUMAN	11	1195.07
DYNC1LI1_HUMAN	14	1194.47
PXN_HUMAN	13	1194.33
NUDT1_HUMAN	12	1192.08
TNKS_HUMAN	14	1191.75
RAD51B_HUMAN	18	1191.58
RPL23A_CANAX	59	1190.74
CLK4_HUMAN	8	1190.29
ZCCHC9_HUMAN	10	1187.92
XRCC1_HUMAN	13	1187.57
CLK1_HUMAN	10	1182.32
TRAF3_HUMAN	11	1182.11
ACIN1_HUMAN	11	1181.66
PACSIN1_HUMAN	11	1181.26
UBL4B_HUMAN	13	1180.67
CLIC5_HUMAN	13	1178.97
ATG16L1_HUMAN	9	1177.69
ZAP70_HUMAN	11	1177.42
RIPK2_HUMAN	15	1175.77
MCMBP_HUMAN	13	1174.77
HERC5_HUMAN	24	1172.72
FOB64_003657_CANAX	57	1171.48
COPG2_HUMAN	15	1171.14
PRE6_CANAX	61	1170.58
TWNK_HUMAN	29	1166.92
KLHDC10_HUMAN	8	1163.96
EXOSC1_HUMAN	19	1162.55
TUBGCP2_HUMAN	14	1161.41
ECT2_HUMAN	7	1160.2
ADI1_HUMAN	17	1159.99
HMG20B_HUMAN	10	1159.98
FBXO5_HUMAN	13	1158.83
ERCC4_HUMAN	17	1157.92
FOB64_005271_CANAX	60	1156.38
CUL5_HUMAN	13	1156.38
ELOB_HUMAN	15	1155.65
TCEANC2_HUMAN	13	1151.71
SCFD1_HUMAN	11	1150.42
SNRNP27_HUMAN	14	1150.07
CHAF1A_HUMAN	12	1149.84
FOB64_006223_CANAX	45	1147.9
CPLANE2_HUMAN	10	1144.96
CTU2_HUMAN	12	1144.3
DPF2_HUMAN	12	1143.92
CKM_HUMAN	9	1143.91
PML_HUMAN	14	1142.85
HDAC10_HUMAN	14	1142.78
AGAP3_HUMAN	11	1136.79
WAPL_HUMAN	12	1136.08
WEE1_HUMAN	7	1135.38
CDKN3_HUMAN	19	1135.12
UBXN7_HUMAN	10	1134.65
E2F3_HUMAN	15	1134.23
LSM6_HUMAN	11	1134.07
DCLRE1C_HUMAN	10	1132.21
EHMT2_HUMAN	13	1131.76
SNX17_HUMAN	19	1130.3
ZBTB2_HUMAN	15	1127.31
POLRMT_HUMAN	29	1124.58
SMARCA1_HUMAN	7	1124.42
WDR4_HUMAN	16	1123.55
RNF8_HUMAN	11	1122.98
DBP5_CANAX	24	1122.71
E2F6_HUMAN	11	1119.61
LRGUK_HUMAN	13	1119.48
SCAF4_HUMAN	14	1118.51
IGF2BP3_HUMAN	12	1116.73
GSTM2_HUMAN	21	1115.03
RIMKLB_HUMAN	32	1113.61
PANK1_HUMAN	18	1113.07
RPS6KA3_HUMAN	9	1112.52
GIPC1_HUMAN	11	1110.44
SMG6_HUMAN	13	1110.27
GSTT2B_HUMAN	12	1109.77
PAN2_HUMAN	19	1108.49
DYNLRB1_HUMAN	12	1107.52
REC8_HUMAN	13	1107.37
HECW2_HUMAN	16	1107.21
CASKIN1_HUMAN	10	1105.04
TNFAIP3_HUMAN	14	1104.43
SCAF8_HUMAN	15	1104.05
ANAPC11_HUMAN	12	1101.44
KIF21A_HUMAN	10	1100.74
COIL_HUMAN	14	1100.5
HERC4_HUMAN	13	1099.42
DUSP8_HUMAN	13	1099.42
ARID4A_HUMAN	9	1098.7
GRB10_HUMAN	15	1096.88
CARHSP1_HUMAN	11	1096.51
NUP62_HUMAN	13	1096.5
AEN_HUMAN	18	1095.06
PANK4_HUMAN	14	1090.49
RBBP4_HUMAN	9	1089.66
PPP1R12B_HUMAN	13	1089.29
FAF2_HUMAN	15	1088.25
SOCS6_HUMAN	11	1086.53
SMARCC2_HUMAN	19	1085.05
NBP35_CANAX	13	1084.34
ESF1_HUMAN	15	1084.26
SNIP1_HUMAN	17	1083.05
HIPK2_HUMAN	8	1079.54
TBL1XR1_HUMAN	12	1078.57
LEF1_HUMAN	6	1076.88
SEC24A_HUMAN	12	1075.18
SMOX_HUMAN	23	1074.94
TRIM32_HUMAN	10	1074.84
POLE3_HUMAN	10	1074.57
KMT2A_HUMAN	12	1072.27
PPP2R5D_HUMAN	13	1072.14
UIMC1_HUMAN	28	1072.05
SPDL1_HUMAN	17	1071.98
NOP10_HUMAN	16	1071.2
BECN1_HUMAN	14	1070.51
AIP_HUMAN	13	1068.24
MAPRE3_HUMAN	13	1067.99
TBPL2_HUMAN	13	1067.93
ADCY7_HUMAN	7	1065.57
POR_HUMAN	4	1065.56
ATG12_HUMAN	11	1062.7
APEH_HUMAN	17	1062.38
ACTL6A_HUMAN	10	1061.54
FOB64_006188_CANAX	74	1061.35
NF1_HUMAN	15	1058.97
NCOA6_HUMAN	8	1057.64
TOM1_HUMAN	13	1057.59
TTBK1_HUMAN	13	1055.16
FOB64_005914_CANAX	58	1055.11
SH3GL2_HUMAN	10	1055.11
PDE4B_HUMAN	14	1055.07
RPA4_HUMAN	12	1054
STAM_HUMAN	22	1053.55
CENPT_HUMAN	20	1052.22
PDXP_HUMAN	19	1052.03
PMS2_HUMAN	14	1051.25
EEA1_HUMAN	16	1051.07
ERCC6L2_HUMAN	15	1049.5
KIF3C_HUMAN	12	1048.98
CEBPB_HUMAN	8	1048.47
VTI1A_HUMAN	11	1046.08
ALDH9A1_HUMAN	9	1045.88
TSPYL2_HUMAN	12	1045.08
SMTNL1_HUMAN	15	1043.59
S100B_HUMAN	11	1040.68
RECQL5_HUMAN	18	1040.19
TCEA3_HUMAN	8	1037.95
UNC119_HUMAN	13	1037.88
SIT4_CANAX	58	1037.02
ALDH7A1_HUMAN	10	1036.69
COPS8_HUMAN	12	1035.76
MRE11_HUMAN	16	1032.86
MUS81_HUMAN	15	1032.68
KRT17_HUMAN	13	1031.44
TRMT6_HUMAN	17	1031.02
ZBTB48_HUMAN	6	1030.61
AGFG1_HUMAN	10	1029.85
CDKN2A_HUMAN	8	1029.67
MAK16_HUMAN	16	1029
EML5_HUMAN	11	1025.36
PLA2G4A_HUMAN	14	1024.61
CCNB3_HUMAN	13	1024.22
GLI1_HUMAN	10	1022.39
EXOSC2_HUMAN	27	1020.26
FERMT2_HUMAN	17	1019.22
NNMT_HUMAN	17	1018.94
NEIL3_HUMAN	11	1018.78
DDX59_HUMAN	21	1018.61
CLASP2_HUMAN	10	1017.85
KAT6B_HUMAN	13	1012.96
PRPF38A_HUMAN	12	1011.94
ARFGEF1_HUMAN	14	1010.87
WAS_HUMAN	13	1010.31
PIAS1_HUMAN	11	1008.25
ERRFI1_HUMAN	9	1006.73
MINK1_HUMAN	10	1004.9
RPS4A_CANAX	56	1004.86
BAG6_HUMAN	13	1002.9
RPS6A_CANAX	60	1002.84
NRP1_HUMAN	15	1002.27
SPHK1_HUMAN	17	1001.88
PRKCQ_HUMAN	10	1000.61
TLK2_HUMAN	10	1000.36
USP36_HUMAN	13	1000.31
TPP1_HUMAN	16	999.741
RCL1_HUMAN	16	999.722
TRIM33_HUMAN	9	998.777
CDC40_HUMAN	13	998.215
GCSH_HUMAN	33	997.736
HERC3_HUMAN	9	997.513
NUDT21_HUMAN	18	995.343
PAIP1_HUMAN	23	993.914
SART3_HUMAN	17	992.983
RAD50_HUMAN	14	991.369
STRN3_HUMAN	9	990.906
GNMT_HUMAN	20	987.746
MAU2_HUMAN	9	987.715
CSTF2T_HUMAN	12	985.733
ELL_HUMAN	10	984.886
TOX2_HUMAN	9	984.808
RPS1_CANAX	57	983.663
SETD3_HUMAN	26	981.847
CRYAB_HUMAN	9	979.87
NGDN_HUMAN	14	977.239
WDR75_HUMAN	16	976.349
ZNF217_HUMAN	6	975.913
NDOR1_HUMAN	16	974.591
TUBD1_HUMAN	10	974.175
CLK2_HUMAN	8	973.243
YOD1_HUMAN	10	972.645
CHAF1B_HUMAN	12	972.533
SH3BGRL_HUMAN	11	971.681
SRSF4_HUMAN	8	970.043
KDM7A_HUMAN	12	969.219
RBM4_HUMAN	12	969.117
SRI_HUMAN	12	968.756
POLR1G_HUMAN	8	968.277
NKRF_HUMAN	10	968.014
SENP7_HUMAN	12	966.169
UTP23_HUMAN	14	966.066
MGLL_HUMAN	25	965.217
FBXO9_HUMAN	10	963.584
SMARCA2_HUMAN	8	963.15
PLEKHA5_HUMAN	12	962.883
USP2_HUMAN	9	961.649
FKBP6_HUMAN	18	961.649
CENPW_HUMAN	24	961.002
CLK3_HUMAN	8	958.246
USP18_HUMAN	11	958.108
PDIA6_HUMAN	10	957.268
SMYD3_HUMAN	13	956.358
SEC27_CANAX	32	954.771
TIM22_CANAX	24	953.222
VASP_HUMAN	12	952.363
ZPR1_HUMAN	13	952.095
BRAF_HUMAN	8	952.076
FOXA1_HUMAN	6	952.066
DDIT3_HUMAN	20	951.077
TRAK1_HUMAN	10	949.482
HSPB2_HUMAN	9	947.741
DUSP9_HUMAN	13	946.066
WDR74_HUMAN	15	944.178
DCTN5_HUMAN	9	942.112
VAMP1_HUMAN	10	939.116
CBX3_HUMAN	18	939.085
ATM_HUMAN	6	938.671
NCAPG_HUMAN	6	938.671
FYTTD1_HUMAN	7	938.281
CCT8L2_HUMAN	9	938.027
PTPN6_HUMAN	36	937.205
IPO8_HUMAN	10	936.545
DNAJC7_HUMAN	14	936.291
PRPF4_HUMAN	18	934.992
CCAR2_HUMAN	11	934.766
PHLPP1_HUMAN	11	934.362
FOB64_002580_CANAX	30	933.46
IRF7_HUMAN	8	933.255
KDM3A_HUMAN	14	931.876
TCF7L2_HUMAN	6	930.718
WDR12_HUMAN	9	930.395
MLH3_HUMAN	13	929.547
NUFIP1_HUMAN	7	928.998
NOM1_HUMAN	12	928.715
NELFA_HUMAN	13	927.467
RNF40_HUMAN	10	927.035
GNL3L_HUMAN	16	925.604
ZUP1_HUMAN	11	924.525
TRMT61A_HUMAN	16	924.169
DDX4_HUMAN	10	923.829
KATNIP_HUMAN	11	922.012
HSPB3_HUMAN	8	919.836
MARCKS_HUMAN	12	917.153
PCBP1_HUMAN	9	916.119
CHMP4C_HUMAN	11	915.244
STK11_HUMAN	8	914.161
FRQ1_CANAX	5	911.76
HMGN1_HUMAN	11	911.707
SPG11_HUMAN	11	911.486
UBE2Z_HUMAN	13	910.008
DUSP7_HUMAN	13	909.43
CYC1_CANAX	47	909.367
NOL7_HUMAN	13	908.505
UCHL3_HUMAN	10	907.205
PASK_HUMAN	19	906.062
NCAPD2_HUMAN	17	905.472
ZNF207_HUMAN	9	905.275
USP33_HUMAN	16	903.407
DUSP11_HUMAN	10	903.081
RB1CC1_HUMAN	8	902.416
PCF11_HUMAN	14	901.541
RNGTT_HUMAN	14	901.232
ZNF746_HUMAN	14	897.003
MED23_HUMAN	11	895.97
ANK1_HUMAN	7	894.819
TBP_HUMAN	7	894.372
ANAPC5_HUMAN	10	894.237
ARRDC3_HUMAN	19	894.088
GSTM3_HUMAN	17	890.559
PTTG1_HUMAN	9	889.818
CCNP_HUMAN	12	885.818
NAP1L5_HUMAN	11	884.473
RNF4_HUMAN	9	884.019
TENT4A_HUMAN	10	883.229
RPS19A_CANAX	56	881.323
AHR_HUMAN	17	881.046
BDP1_HUMAN	27	880.698
ACTR8_HUMAN	6	880.677
REL_HUMAN	5	879.795
NDUFAF6_HUMAN	25	879.772
ORC4_HUMAN	12	878.52
FOB64_005847_CANAX	58	877.144
RGS6_HUMAN	17	874.632
TXNDC8_HUMAN	15	874.631
ASH1L_HUMAN	10	873.915
ERCC1_HUMAN	16	873.907
GATAD2A_HUMAN	11	873.374
DNA2_HUMAN	8	872.524
PARP4_HUMAN	9	872.033
MRPS15_HUMAN	29	871.451
MED30_HUMAN	18	868.384
YTHDF1_HUMAN	16	867.388
SMU1_HUMAN	14	866.82
LITAF_HUMAN	10	866.085
BANF1_HUMAN	16	865.111
WASF2_HUMAN	9	865.091
CRYZ_HUMAN	8	864.827
LDHAL6A_HUMAN	11	864.777
BAG4_HUMAN	10	863.759
SGK3_HUMAN	14	863.404
THOC5_HUMAN	10	860.662
AXIN2_HUMAN	8	860.036
CHD9_HUMAN	27	859.785
FBXO6_HUMAN	8	859.19
WBP2_HUMAN	11	858.71
EXOSC10_HUMAN	25	857.494
THOC1_HUMAN	13	857.448
DNAJC8_HUMAN	12	856.443
ISG20_HUMAN	16	856.285
STMN1_HUMAN	9	855.443
CFAP20_HUMAN	8	854.77
RYBP_HUMAN	11	854.72
MCPH1_HUMAN	11	854.433
PHLPP2_HUMAN	13	853.833
PPAN_HUMAN	22	853.369
PSME4_HUMAN	12	852.601
FOB64_005311_CANAX	42	851.999
DNAJC9_HUMAN	8	850.022
SETDB2_HUMAN	10	849.706
ZBTB20_HUMAN	4	849.314
MMS19_HUMAN	10	846.954
ROCK1_HUMAN	14	845.856
BMAL1_HUMAN	11	844.837
MYO1C_HUMAN	10	844.531
MNS1_CANAX	9	842.836
WNK1_HUMAN	16	842.744
HNRNPH2_HUMAN	16	842.335
APOBEC3G_HUMAN	9	839.357
CEBPA_HUMAN	6	839.201
PDCL3_HUMAN	12	839.069
KLF5_HUMAN	6	838.417
PCCA_HUMAN	29	837.324
POLR2F_HUMAN	10	836.393
CHD3_HUMAN	8	835.81
RNASEH1_HUMAN	20	835.524
ASRGL1_HUMAN	14	835.086
SEC61_CANAX	14	833.596
PPP2R5A_HUMAN	10	833.444
COPS6_HUMAN	9	831.753
MPG_HUMAN	26	831.621
IMMP1L_HUMAN	30	831.504
TAF2_HUMAN	13	830.823
PEX5_HUMAN	8	829.743
USP47_HUMAN	12	829.068
MNAT1_HUMAN	16	828.393
RPL5_CANAX	56	825.383
ZMIZ1_HUMAN	11	825.289
CIC_HUMAN	10	824.903
EPS8_HUMAN	9	824.457
KIF2C_HUMAN	9	824.266
RAB3GAP1_HUMAN	14	822.647
DUSP4_HUMAN	7	822.264
H1-1_HUMAN	6	821.155
ATRIP_HUMAN	9	819.873
NDEL1_HUMAN	11	819.814
BCAP31_HUMAN	4	819.174
RPN1_HUMAN	4	819.174
SRP68_HUMAN	21	819.139
OSBP_HUMAN	18	818.815
AQR_HUMAN	15	818.659
NDRG2_HUMAN	13	818.128
CLTB_HUMAN	8	818.037
PEA15_HUMAN	11	817.91
HIPK1_HUMAN	6	817.761
CAPN3_HUMAN	12	817.642
CENPF_HUMAN	9	817.629
NUP133_HUMAN	7	817.552
RABEP1_HUMAN	9	817.225
TCERG1_HUMAN	15	815.522
PDRG1_HUMAN	12	814.883
FOB64_004036_CANAX	5	814.452
ABI1_HUMAN	9	812.997
TIAL1_HUMAN	8	812.788
PRPF6_HUMAN	15	812.303
CBR3_HUMAN	6	808.979
RIOK3_HUMAN	17	808.471
ALA1_CANAX	42	807.474
RSRC1_HUMAN	9	807.398
GINS2_HUMAN	11	806.091
EPB41_HUMAN	12	804.772
EIF2D_HUMAN	15	804.28
TRIB2_HUMAN	10	803.551
LIMK2_HUMAN	10	803.102
INTS11_HUMAN	14	801.093
SETD7_HUMAN	6	801.025
RBM25_HUMAN	8	800.901
DOCK8_HUMAN	16	800.632
EPB41L2_HUMAN	8	800.005
RBM12_HUMAN	10	799.949
DSCC1_HUMAN	11	799.238
FOXK2_HUMAN	9	797.199
TGFBRAP1_HUMAN	12	797.083
TUT7_HUMAN	20	796.908
RUNX2_HUMAN	23	795.866
PANK3_HUMAN	14	794.119
PDPK1_HUMAN	14	794.009
NT5C1A_HUMAN	20	793.564
TRIM31_HUMAN	9	792.231
RCC1_HUMAN	8	792.083
NOC2L_HUMAN	8	791.901
PRPF31_HUMAN	8	791.901
UBAP2L_HUMAN	11	791.665
CTDSP2_HUMAN	8	790.732
IMPA2_HUMAN	22	790.662
CUL4B_HUMAN	8	790.279
BTK_HUMAN	13	788.695
GCK_HUMAN	11	786.74
ING2_HUMAN	8	785.198
CSTF1_HUMAN	13	784.555
DNAJC21_HUMAN	16	784.074
DYRK1A_HUMAN	6	783.945
TST_HUMAN	24	782.781
UPB1_HUMAN	25	782.731
PPP1R14B_HUMAN	16	782.449
NDC80_HUMAN	12	781.003
RBP2_CANAX	52	780.79
USP27X_HUMAN	10	780.57
U2AF1_HUMAN	13	780.34
AKTIP_HUMAN	12	780.109
MITF_HUMAN	6	778.275
TBL3_HUMAN	22	778.023
LRCH1_HUMAN	9	778.006
PRKX_HUMAN	14	777.16
KANK4_HUMAN	11	774.304
LIN9_HUMAN	12	772.315
PSMG1_HUMAN	10	772.265
BUB3_HUMAN	8	771.184
PRPF39_HUMAN	9	770.925
GRB2_HUMAN	5	768.791
EML3_HUMAN	15	768.35
SETMAR_HUMAN	11	768.021
HMGCL_HUMAN	29	767.721
MOB4_HUMAN	10	764.872
ANKFY1_HUMAN	13	764.781
WASL_HUMAN	11	762.741
RO60_HUMAN	15	762.668
HNRNPL_HUMAN	6	760.582
NOC4L_HUMAN	8	759.98
TRAF7_HUMAN	10	758.837
MRGBP_HUMAN	9	758.23
ASB2_HUMAN	14	757.074
FABP4_HUMAN	7	756.676
PDLIM1_HUMAN	9	756.584
FGD6_HUMAN	9	754.702
REV3L_HUMAN	13	753.721
RANBP6_HUMAN	8	753.707
PSTPIP1_HUMAN	10	753.354
ELP2_HUMAN	14	753.054
EXOC8_HUMAN	9	752.068
ARHGEF2_HUMAN	10	751.845
EIF4ENIF1_HUMAN	10	751.506
AGM1_CANAX	35	750.014
EPS15_HUMAN	6	749.977
RPL36A-HNRNPH2_HUMAN	10	749.483
YEATS4_HUMAN	7	749.481
NCF1_HUMAN	13	748.461
GRK2_HUMAN	8	748.381
XPA_HUMAN	13	748.092
ASAP2_HUMAN	9	747.953
RIPK3_HUMAN	12	747.02
CGAS_HUMAN	8	746.998
ZRANB1_HUMAN	13	745.11
NR4A1_HUMAN	6	744.911
RAD51C_HUMAN	8	744.903
SMC1A_HUMAN	8	743.714
ARHGAP11A_HUMAN	9	743.675
CCDC124_HUMAN	17	743.075
SAP30BP_HUMAN	10	742.449
UCHL1_HUMAN	7	742.36
PCNP_HUMAN	8	740.284
SH3KBP1_HUMAN	10	739.8
RNF168_HUMAN	7	739.64
ARHGEF4_HUMAN	7	739.63
MTHFD2L_HUMAN	23	738.198
MAPRE2_HUMAN	11	737.801
CEP290_HUMAN	8	736.956
PPFIA3_HUMAN	9	736.928
DPPA4_HUMAN	5	736.913
CTTN_HUMAN	6	736.112
LRSAM1_HUMAN	14	734.607
APTX_HUMAN	10	734.038
MORC2_HUMAN	14	733.231
NEFH_HUMAN	9	732.924
NEFM_HUMAN	6	732.731
CEP250_HUMAN	11	732.36
ZNF24_HUMAN	6	732.31
UTP20_HUMAN	14	731.842
AURKC_HUMAN	5	731.169
NFYC_HUMAN	5	731.169
DUSP6_HUMAN	15	730.724
RCBTB2_HUMAN	10	730.495
RRN3_HUMAN	14	729.661
KMT2D_HUMAN	5	729.136
MVP_HUMAN	30	729.113
DAPK1_HUMAN	6	728.664
PRMT7_HUMAN	19	726.63
MICAL3_HUMAN	7	726.154
DNMBP_HUMAN	9	725.997
PPP6R3_HUMAN	11	724.349
TBC1D15_HUMAN	24	724.149
DBF4_HUMAN	11	724.096
KIF18B_HUMAN	10	723.413
HOG1_CANAX	40	722.745
SUPV3L1_HUMAN	11	722.417
RREB1_HUMAN	5	722.395
ILF3_HUMAN	9	721.381
ANKHD1_HUMAN	11	720.25
EIF3K_HUMAN	14	720.015
TCIRG1_HUMAN	2	720
RNF115_HUMAN	11	717.756
CRYAA_HUMAN	7	717.475
FOB64_005244_CANAX	49	717.224
MED17_HUMAN	11	717.156
RASSF1_HUMAN	10	717.069
NIPSNAP2_HUMAN	12	716.742
SAE1_HUMAN	8	716.216
CCNE2_HUMAN	6	715.421
CLIP2_HUMAN	10	715.158
STAT5A_HUMAN	15	713.226
HYPK_HUMAN	10	712.968
STAT2_HUMAN	16	712.885
SYF2_HUMAN	26	712.164
LIG4_HUMAN	13	711.554
ZFR_HUMAN	9	711.407
CLOCK_HUMAN	5	710.941
RNMT_HUMAN	12	710.475
SLC32A1_HUMAN	12	710.113
RAD54L2_HUMAN	13	709.95
TPM1_HUMAN	7	709.627
DAPK3_HUMAN	9	708.25
DYRK1B_HUMAN	5	708.241
THOC6_HUMAN	8	707.809
ENY2_HUMAN	14	707.181
TAMALIN_HUMAN	10	705.999
URB1_HUMAN	14	705.981
PRE9_CANAX	55	705.748
AZIN1_HUMAN	8	705.688
PLD1_HUMAN	14	703.902
MYLIP_HUMAN	14	702.391
TRIM11_HUMAN	9	701.064
ZCCHC3_HUMAN	12	700.902
LHPP_HUMAN	13	698.777
ESCO1_HUMAN	12	698.329
TACC3_HUMAN	10	698.023
PCBD1_HUMAN	9	697.512
EGLN3_HUMAN	7	696.773
TPMT_HUMAN	13	693.768
ZBTB47_HUMAN	5	693.284
FOB64_003783_CANAX	10	693
UBE4A_HUMAN	8	692.534
KRT2_HUMAN	6	692.412
OTUD4_HUMAN	9	692.188
WTAP_HUMAN	11	692.122
FOXP3_HUMAN	8	691.807
TOE1_HUMAN	11	691.243
RARA_HUMAN	9	689.817
NOP14_HUMAN	10	688.983
FOB64_002405_CANAX	36	688.333
TPM4_HUMAN	16	688.207
ZRANB2_HUMAN	6	687.205
SNX9_HUMAN	11	686.954
COMMD10_HUMAN	8	686.368
DUSP10_HUMAN	15	683.823
ATF3_HUMAN	8	683.709
MYCN_HUMAN	7	682.847
TDRD5_HUMAN	10	682.521
ANKRD17_HUMAN	11	682.386
GLE1_HUMAN	12	682.015
DCTN6_HUMAN	11	681.955
ACTL8_HUMAN	7	681.377
TNIP1_HUMAN	8	680.9
TCF7L1_HUMAN	4	680.575
EXOSC6_HUMAN	16	680.315
KATNAL2_HUMAN	7	679.242
HNRNPUL2_HUMAN	9	679.046
PKN3_HUMAN	9	679.009
PMF1_HUMAN	4	678.645
SMAD1_HUMAN	8	678.302
ANLN_HUMAN	7	677.428
XDH_HUMAN	13	676.382
TFIP11_HUMAN	9	675.909
INTS8_HUMAN	11	675.437
FOB64_003734_CANAX	56	674.784
BCL6_HUMAN	6	672.679
DGKH_HUMAN	9	672.606
ANKS1B_HUMAN	9	672.153
CBFA2T3_HUMAN	15	670.888
PDF_HUMAN	27	670.486
STMN2_HUMAN	7	669.657
SDS_HUMAN	27	668.075
TTF1_HUMAN	7	667.061
RNF25_HUMAN	12	665.845
FOXN4_HUMAN	6	665.035
SPOUT1_HUMAN	14	664.824
NOL8_HUMAN	12	662.279
DNAH17_HUMAN	14	662.222
LARP7_HUMAN	8	661.82
PLK4_HUMAN	9	661.641
UFM1_HUMAN	22	661.219
DUSP13_HUMAN	14	661.193
CSTF2_HUMAN	7	661.091
FABP6_HUMAN	13	659.786
POP4_HUMAN	11	657.59
ATP2A1_HUMAN	3	655.437
CYB5R4_HUMAN	3	655.437
CYP2C9_HUMAN	3	655.437
HMGCR_HUMAN	3	655.437
CENPQ_HUMAN	10	653.859
IQCB1_HUMAN	7	653.549
SPART_HUMAN	8	653.419
USP16_HUMAN	7	653.29
MMADHC_HUMAN	18	652.79
ZNF473_HUMAN	5	651.547
SEC31B_HUMAN	12	651.411
AKR1D1_HUMAN	7	651.398
CUL9_HUMAN	9	651.097
PET9_CANAX	37	649.127
WDR48_HUMAN	12	647.021
SLFN11_HUMAN	7	646.926
PIWIL4_HUMAN	9	646.907
RBM17_HUMAN	11	646.182
WDR36_HUMAN	19	646.045
CD2AP_HUMAN	8	645.452
ARPC1B_HUMAN	9	645.218
PTK6_HUMAN	8	645.139
HECTD3_HUMAN	12	645.058
BAZ2B_HUMAN	11	645.005
TMSB10_HUMAN	8	644.649
ING4_HUMAN	8	643.374
SAP130_HUMAN	7	642.715
BCL2A1_HUMAN	11	642.679
STON2_HUMAN	8	642.557
TNFAIP1_HUMAN	6	641.607
SIRT2_HUMAN	11	641.427
HOOK3_HUMAN	11	640.452
MID2_HUMAN	9	639.31
FGD5_HUMAN	6	639.033
COPS3_HUMAN	7	638.671
YTHDF3_HUMAN	14	637.869
DUSP3_HUMAN	6	637.684
PPP2R5C_HUMAN	7	637.553
RTEL1_HUMAN	6	636.662
NEURL1_HUMAN	10	636.488
WDR55_HUMAN	13	636.123
ARHGEF11_HUMAN	7	636.106
CLIC6_HUMAN	5	636.023
TSPYL1_HUMAN	9	635.944
HSD17B1_HUMAN	15	635.807
SPECC1L_HUMAN	6	635.552
EIF2A_HUMAN	12	635.453
STUB1_HUMAN	7	635.314
PTPN14_HUMAN	8	634.78
HABP4_HUMAN	11	633.968
PHF2_HUMAN	13	633.918
UTP15_HUMAN	16	633.731
GPKOW_HUMAN	7	633.153
ZMYND11_HUMAN	7	632.507
FHL1_HUMAN	10	632.502
ARFGAP3_HUMAN	11	632.463
DDX11_HUMAN	7	630.939
IRS2_HUMAN	17	629.321
RIT2_HUMAN	5	628.877
DUSP2_HUMAN	5	628.866
EXO1_HUMAN	7	628.288
GEN1_HUMAN	7	628.288
PIF1_HUMAN	7	628.288
PIM1_HUMAN	9	628.239
ARHGDIB_HUMAN	10	628.173
RECQL_HUMAN	7	627.609
MLLT3_HUMAN	11	627.497
SNF8_HUMAN	10	626.554
OTUD7A_HUMAN	8	626.442
[truncated: 5,483 more rows]
