# Supplementary material for: Computational prediction of Homo sapiens–Candida albicans protein–protein interactions reveal key virulence factors using dual RNA-Seq data analysis
Source: Springer Nature journal article supplement (doi:10.1007/s00203-025-04312-4), 2025-04-06
Supplement: MOESM3 [file 203_2025_4312_MOESM3_ESM.xlsx]

## Sheet: KEGG pathways of human genes
2-Oxocarboxylic acid metabolism	Acute myeloid leukemia	Adherens junction	Adipocytokine signaling pathway	Adrenergic signaling in cardiomyocytes	AGE-RAGE signaling pathway in diabetic complications	Alcoholism	Alzheimer disease	Aminoacyl-tRNA biosynthesis	Amino sugar and nucleotide sugar metabolism	AMPK signaling pathway	Amyotrophic lateral sclerosis (ALS)	Antigen processing and presentation	Apelin signaling pathway	Apoptosis	Apoptosis - multiple species	Arachidonic acid metabolism	Arrhythmogenic right ventricular cardiomyopathy (ARVC)	Asthma	Autophagy - animal	Autophagy - other	Axon guidance	Bacterial invasion of epithelial cells	Basal cell carcinoma	Basal transcription factors	Base excision repair	B cell receptor signaling pathway	beta-Alanine metabolism	Biosynthesis of amino acids	Biosynthesis of unsaturated fatty acids	Bladder cancer	Breast cancer	Calcium signaling pathway	cAMP signaling pathway	Carbohydrate digestion and absorption	Carbon metabolism	Cardiac muscle contraction	Cell cycle	Cellular senescence	Central carbon metabolism in cancer	cGMP-PKG signaling pathway	Chagas disease (American trypanosomiasis)	Chemokine signaling pathway	Choline metabolism in cancer	Cholinergic synapse	Chronic myeloid leukemia	Circadian entrainment	Circadian rhythm	Citrate cycle (TCA cycle)	Cocaine addiction
ACO1	TCF7L2	SMAD4	PCK2	ATP2A1	NFATC1	HDAC5	NDUFB9	MTFMT	NPL	PCK2	BCL2L1	RFXANK	SPHK2	BCL2L1	BCL2L1	CYP2J2	EMD	EPX	BCL2L1	ULK2	NFATC2	MAD2L2	CTNNB1	TAF15	MUTYH	NFATC1	MLYCD	NAGS	HSD17B12	CDKN2A	PIK3CD	SPHK2	NFATC1	HKDC1	ACADS	ATP2A1	MAD2L2	CCN1	TIGAR	NFATC1	PIK3CD	RASGRP2	CKB	PRKCG	BCL2L1	GNAI2	PER3	PCK2	RELA
ABHD14A-ACY1	TCF7L1	SMAD2	PCK1	ATP2A2	SMAD4	HDAC4	NDUFB8	IARS2	CYB5R4	PCK1	DAXX	HSPA4	SPHK1	XIAP	CASP7	EPHX2	TCF7	IL10	ATG101	ATG4C	NFATC3	CTTN	TCF7	TAF13	POLB	NFATC2	HADH	PSPH	HACD3	TP53	CDKN1A	SPHK1	ATP2A1	PIK3CD	MDH1	ATP2A2	SMC1A	RAD9A	HIF1A	NFATC2	NFKBIA	NCF1	PIK3CD	FYN	SMAD4	GNAI3	FBXW11	PCK1	PPP1R1B
AADAT	IKBKB	SMAD3	NFKBIB	ATP2A3	PIK3CD	HDAC7	NDUFB7	EARS2	CYB5R3	ELAVL1	TOMM40	IFNG	HDAC5	PMAIP1	BECN1	CBR1	ACTN2	IL13	STK11	IGBP1	NFATC4	DOCK1	TP53	TAF12	XRCC1	NFATC3	ACADS	MTR	SCD	RPS6KA5	BAX	CAMK1D	ATP2A2	PIK3CB	PCCB	ATP2A3	MAD2L1	HIPK3	LDHAL6A	NFATC3	IL12B	NFKBIB	HIF1A	AKT1	CDKN1B	GNAI1	CLOCK	MDH1	ATF2
NAGS	MAP2K2	CTNNB1	STK11	PPP2R3B	SMAD2	HDAC6	NDUFB6	PARS2	GPI	PPP2R3B	TP53	RFX5	HDAC4	SPTAN1	CASP3	CYP4F8	ATP2A1	EPO	HIF1A	BECN1	ABLIM3	CTNNB1	AXIN2	TAF11	POLL	NFKBIB	SMOX	TKTL1	BAAT	E2F1	TCF7L1	ATP2A2	ATP2A3	PRKCB	GLYCTK	UQCR10	MYC	HIPK2	MAP2K2	NFATC4	SMAD2	PIK3CD	MAP2K2	MAP2K1	CDKN1A	CACNA1D	BHLHE40	ACO1	CREB3
ACY1	MAP2K1	INSR	NFKBIE	PPP2R3C	SMAD3	HDAC9	NDUFB5	NARS2	HKDC1	PPP2R3C	CASP3	CALR	SMAD4	BIRC5	DIABLO	ALOX15	ATP2A2	IL3	SNAP29	ATG4B	LIMK2	SEPT9	AXIN1	TAF10	APEX1	PIK3CD	DPYD	ABHD14A-ACY1	TECR	RASSF1	CTNNB1	ATP2A3	CACNA1D	CACNA1D	PCCA	UQCR11	BUB1B	AKT2	MAP2K1	ATP2A1	SMAD3	LAP3	MAP2K1	GNAI2	NFKBIA	GUCY1A1	BHLHE41	ACLY	FOSB
	RUNX1T1	WASL	IKBKB	RAPGEF4	AKT1	FOSB	NDUFB4	SMAD1	GMPPA	STK11	CASP1	PDIA3	SMAD2	ATM	BIRC7	ALOX12	ATP2A3	RAF1	MAP2K2	ATG101	PIK3CD	WASL	TCF4	GTF2A1	POLD2	NFKBIA	HADHA	SDS	SCD5	CDKN1A	MAP2K2	ASPH	NFKBIA	AKT1	H6PD	UQCRQ	PLK1	HIPK4	SCO2	ATP2A2	IKBKB	NFKBIA	MAPK10	GNAI3	GAB2	GUCY1A2	FBXL3	SDHC	PRKACB
	IKBKG	LEF1	AKT1	AKT1	FOXO1	MAP2K1	NDUFB3	MARS2	PGM2	INSR	NEFM	PSME3	SMAD3	BIRC3	BIRC5	LTA4H	CACNB3		MAP2K1	ATG16L1	ENAH	CLTB	GADD45A	GTF2A2	APEX2	NFKBIE	ECHS1	PYCR3	ELOVL6	MDM2	MAP2K1	LAP3	ROCK1	AKT2	ME3	MYL2	CDKN1B	MDM2	GLS	ATP2A3	AKT1	SCYL2	WASL	GNAI1	MAP2K1	PRKG1	BTRC	SDHD	JUN
	RARA	SNAI1	AKT2	AKT2	MAPK10	MAOB	NDUFB2	SLA	CMAS	MAP3K7	BID	CREB1	MAP2K2	BIRC2	BIRC3	CYP4F3	DES		MTMR14	ATG4D	LIMK1	CRK	CDKN1A	TAF8	NEIL1	IKBKB	ALDH9A1	ACO1	ELOVL4	RB1	BAK1	CACNA1E	RAPGEF4	GNAT3	RGN	TPM1	CDKN1A	GADD45A	PTEN	INSR	AKT2	SCYL3	TSC2	PIK3CB	SMAD3	PLCB1	RORC		MAOB
	CEBPA	WASF1	MAPK10	MYL2	NOX4	GNAI2	NDUFB1	YARS2	FPGT	FOXO3	NEFH	NFYC	MAP2K1	BAX	BIRC2	CYP2U1	CACNA1D		MAPK10	ATG12	SSH3	WASF1	TCF7L1	GTF2E1	PARP4	MAP2K2	ALDH7A1	PYCR2	ELOVL5	CCND1	POLK	VDAC3	MAP2K2	MGAM2	HKDC1	UQCRH	ATM	PIK3CB	HKDC1	ROCK1	MAPK10	SCYL1	CHKA	CACNA1D	IKBKB	PLCB3	NPAS2		CREB1
	SPI1	WASF2	ACSBG1	TPM1	IL1A	GNAI3	UQCRQ	CARS1	GNE	AKT1	PRPH	NFYA	MYL2	RIPK1	CASP8	AKR1C3	TCF7L1		IRS2	ATG10	TRPC1	WASF2	TCF7L2	GTF2E2	PARP2	MAP2K1	UPB1	PYCR1	ELOVL3	MAP2K2	NCOA3	PTK2B	BAD		TKTL1	UQCRB	CDKN2D	PIK3CD	PIK3CB	MAP2K2	IKBKG	FOXO3	TSC1	CAMK4	MAP2K2	FOS	CRY2		CREB3L2
	STAT3	WASF3	ACSBG2	BCL2	IL1B	GNAI1	UQCRH	RARS2		AKT2	MAP3K5	CIITA	UCP1	MAP2K2	BAK1	CYP2B6	CACNA1F		ZFYVE1	ATG3	ABL1	PIK3CB	GSK3B	TAF6L	PARP3	IKBKG	HIBCH	ALDOB	ACOT7	MAP2K1	HEYL	PLCE1	SOX9		HADHA	COX5A	PKMYT1	CAPN2	PIK3CD	BAD	MAP2K4	AKT1	DGKZ	CACNA1F	BAD	PRKCA	CRY1		CREB3L3
	ZBTB16	FYN	STAT3	GNAI2	STAT3	PPP1R1B	UQCRB	MTTP		CPT1B	GPX1	RFXAP	CALML6	MAP2K1	XIAP	CBR3	CTNNB1		BECN1	ATG4A	DPYSL2	PIK3CD	GLI2	TAF4B	UNG	PIK3AP1	GAD2	ACY1	ACOT1	VEGFA	AKT1	P2RX1	MAPK10		MCEE	MYH6	SMAD3	CAPN1	MYC	IRS2	IL1B	MAP2K1	MAPK9	PIK3CG	IKBKG	PRKCB	BMAL1		MAOA
	CEBPE	MAP3K7	PPARGC1A	GNAI3	STAT1	CAMKK2	NDUFAB1	LARS2		TSC2	DERL1		TFAM	MAPK10	MAPK10	HPGDS	TCF7L2		RB1CC1	ATG13	GNAI2	SHC1	GLI3	GTF2B	SMUG1	INPPL1				BRAF	AXIN2	VDAC2	CALML6		GPI	COX5B	CDC16	MYC	LDHA	VDAC3	GNAI2	ARRB2	WASF1	PIK3R6	ABL1	PRKCG	PER2		CREB5
	CCNA1	PTPN6	TRADD	GNAI1	PIK3CB	CAMK4	NDUFC2-KCTD14	GATC		TSC1	BAD		RPS6KB2	IKBKG	BAX	PLA2G6	LMNA		TSC2	ATG7	GNAI3	ARPC2	GLI1	GTF2A1L	MPG	PIK3CB				E2F3	AXIN1	VDAC1	GNAI2		MMUT	CACNB3	SMC1B	CDKN2B	LDHB	VDAC2	GNAI3	WASL	WASF2	PIK3R5	CRK	GNB2	PER1		TH
	PIK3CB	TCF4	NFKB1	MYH6	EGR1	TH	CACNA1D	GATB		CRTC2	BAX		GNAI2	BCL2	HTRA2	PRXL2B	TCF4		TSC1	ATG5	GNAI1	ARPC5	DVL3	GTF2I	TDG	JUN				MYC	GADD45A	ATP2A1	GNAI3		ACO1	TPM4	ANAPC13	CDKN2A	LDHC	VDAC1	GNAI1	ARRB1	WASF3	PLCB1	POLK	PER3	CSNK1E		ATF4
	PIK3CD	TCF7	RELA	MYH7	JUN	MAOA	CACNA1F	SEPSECS		CCNA1	MAP2K6		GNAI3	BBC3	PMAIP1	CYP4A22	LEF1		CAMKK2		PARD6G	WAS	BAX	TAF6	MBD4	PTPN6				DAPK3	PIK3CB	CASQ1	GNAI1		ALDOB	CACNA1D	SMAD4	TEP1	TEP1	GNAI2	TICAM1	CRK	PIK3CB	PLCB3	MECOM	PER2	CREB1		NFKB1
	RPS6KB2	FER	MAPK9	CACNB3	CDKN1B	SHC1	NDUFB10			TBC1D1	TOMM40L		GNAI1	BAK1	BBC3	TBXAS1	CTNNA1		ATG16L1		PIK3CB	CTNNA1	SUFU	GTF2H3	POLE4	NFKB1				DAPK2	JUN	CAMK1G	PPP1R1B		HADH	TPM2	ABL1	GATA4	SIRT6	GNAI3	PIK3CB	GNAI2	DGKQ	FOS	GADD45A	PER1	NR1D1		SLC18A1
	RUNX1	SNAI2	CPT1A	TPM4	NFKB1	CREB5	NDUFA10			PIK3CB	APAF1		MEF2B	DFFA	MAPK9	ALOX5	CTNNA3		ATG16L2		FYN	CTNNA3	DDB2	GTF2H2	POLE3	RELA				DAPK1	RB1	CAMK1	ARAP3		PSPH	CACNA1F	CCNA2	LIN9	TP53	GNAI1	JUN	GNAI3	JUN	PRKCA	PIK3CB	CREB1	RBX1		GPSM1
	PML	PTPN1	CPT1C	CACNA1D	RELA	CREB3	NDUFA11			PIK3CD	BCL2		EGR1	DIABLO	BID	PTGIS			PIK3CD		PARD6B	FN1	LEF1	GTF2H1	POLE2	MALT1				E2F2	RPS6KB2	PDE1B	PIK3CB		SDS	UQCRHL	CDC6	AKT1	AKT1	CREB3L2	IFNB1	GNAI1	RPS6KB2	CREB5	PIK3CD	ITPR3	RORA		GNAI2
	NFKB1	EP300	CPT1B	TPM2	MAPK9	CREB1	NDUFA12			PPARGC1A			CAMK4	DAXX	APAF1	GGT5			MAP3K7		PARD6A	ARPC1B	BAK1	TAF5	NEIL3	FOS					DVL3	SPR	JUN		PGLS	COX8A	CCN1	CCND1	AKT2	MYH6	IRAK1	STAT3	DGKH	PRKCB	RB1	ADCY7			GNAI3
	MYC	WAS	NFKBIA	CACNA1F	PLCB1	GNB2	NDUFA13			RPS6KB2			PIK3CG	GADD45A	BCL2	PLA2G4B			BNIP3		RASA1	ARPC1A	POLK	GTF2H5	NEIL2	CARD11					PGR	CACNA1D	CAMK4		GLUD2	COX7B2	CCNB1	CCND3	MET	MYH7	C3	STAT2	DGKA	CREB3	GRB2	RPS6KA5			GNAI1
	DUSP6	CTNNA1	IRS2	PIK3CG	PLCB3	HDAC10	COX6A1			AKT1S1			PIK3R6	BID		PLA2G4A			RPS6KB2		RGS3	ARPC5L		GTF2H4	POLD3	PRKCB					DDB2	CAMK4	CACNA1F		HIBCH	COX6C	EP300	CCND2	GLS2	CALML6	NFKB1	STAT1	GPCPD1	CREB1	DDB2	CAMK2B
	IL3	CTNNA3	RXRG	PIK3R6	ZNF225	HAT1	COX6A2			FASN			PIK3R5	JUN		PLA2G4F			DDIT4		MYL9	CBL		TAF3	NTHL1	CHUK					NFKB2	CACNA1F	PIK3CD		ECHS1	TPM3	ZBTB17	HIPK1		MEF2B	RELA	PREX1	PDGFC	GNB2	NFKB1	CALML6
	TCF4	ACTN1	RXRA	PIK3R5	PIM1	CALML6	GSK3B			CPT1A			KLF2	TRADD		PLA2G4E			ATG3		LAP3	CD2AP		MNAT1		BCL10					BRCA1	MYLK	GLI3		SDHC	COX4I2	RBL2	RBBP4		MYLK	MYD88	PIK3CB	RALGDS	PIK3CD	MYC	GUCY1B1
	TCF7	PARD3	RXRB	PLCB1	PRKCA	CREB3L2	UQCRC2			CPT1C			PLIN1	MAP3K5		PLA2G4D			AKT1S1		ARHGEF12	MET		TAF7L		INPP5D					TCF4	ITPKA	GLI1		SDHD	COX4I1	CCNA1	PTEN		CACNA1D	PLCB1	GRK5	FOS	CAMK2B	CDKN2A	PRKACB
	PIM1	ACTN4	CHUK	PLCB3	PRKCB	CREB3L3	UQCRC1			ULK1			PLCB1	CAPN2		CYP2C9			ATG7		DPYSL5	ARHGAP10		TAF7		AKT1					TCF7	ITPKC	NFKB1		GCSH	COX7A1	MAD1L1	NFATC1		CACNA1F	NOS2	GRK2	PRKCA	ITPR3	SHC1
	CHUK	TCF7L1	PPARA	TPM3	PRKCE	CAMKK1	HSD17B10			CREB3			NOS2	CAPN1		CYP2C8			ATG5		NGEF	CLTA		TBPL2		DAPP1					BRCA2	ITPKB	RELA			COX7A2	GADD45A	NFATC2		PIK3CG	PLCB3	PIK3R5	SP1	ADCY7	CHUK
	PER2	TCF7L2	PRKCQ	PRKCA	PRKCD	GRB2	ATP2A1			CREB5			PLCB3	CEBPZ		CYP4A11			MAPK9		PRKCA	ELMO1		TBPL1		AKT2					TEP1	PLCB1	MYL9			COX6A1	CCNE1	NFATC3		GUCY1A1	TRAF6	PIK3CG	PRKCB	AKT2	BAX
	AKT2	MET	ACSL3	CREB5	PRKCZ	BRAF	ATP2A2			CCN1			BECN1	RELA		PTGES3			DAPK3		SSH1	ELMO2		TAF4		GSK3B					SHC1	NOS2	FOS			COX6A2	ANAPC11	NFATC4		PIK3R6	FOS	PIK3R6	PRKCG	CREB3L2	E2F3
	LEF1	BAIAP2	PTPN11	CREB3	VEGFA	HDAC11	ATP2A3			CREB1			ZNF225	MAPK9		CYP2E1			DAPK2		CAMK2B	ELMO3		GTF2F1		GRB2					FOS	PLCB3	CREB5			COX7A2L	RB1	RASSF3		PIK3R5	IFNG	PTK2B	PLA2G4B	CREB3L3	MDM2
	RELA	CSNK2B	ACSL1	CREB1	BAX	ATF4	COX7B2			SCD5			MYLK2	APAF1		GPX1			DAPK1		PRKCZ			TAF2		BTK					SP1	PRKCA	CREB3			MYH7	ORC6	RASSF5		GUCY1A2	CHUK	NFKB1	PLA2G4A	PRKACB	RELA
	AKT1	CREBBP	ACSL4	CAMK2B	CASP3	SLC18A1	UQCRHL			PPARG			MEF2D	HTRA2		GPX2			ULK2		SSH2			GTF2F2							E2F3	PRKCB	CREB1			ASPH	ESPL1	RAD1		PRKG1	IL12A	ROCK2	WAS	SLC18A3	TP53
	PPARD		ACSL5	PPP2R5E	FN1	ATF2	COX6C			HMGCR			PRKCE	ATF4		CYP2C19			IGBP1		FES			TBP							JAG2	MYLK2	AKT2			UQCRC2	WEE2	VDAC2		GTF2I	MAPK9	PLCB1	PLA2G4F	ATF4	E2F2
	BCL2A1		CAMKK2	ADCY7	CCND1		PLCB1			PPP2R5E			MYLK3	CASP6					ULK1		CFL1			TAF9							NCOA1	MYLK3	ADCY7			COX7C	PTTG2	MAPKAPK2		MYL9	IL10	PARD3	PLA2G4E	BCL2	E2F1
	BAD		IKBKG	RPS6KA5	AKT2		PLCB3			CCNA2			GNB2	DDIT3					TEP1		ABLIM2			TAF1L							ESR2	CAMK2B	CAMK2B			UQCRC1	CDC7	CCNE2		PLCB1	CALR	PLCB3	PLA2G4D		AKT1
	CSF2			CALML6	IL6		COX8A			MLYCD			ITPR3	NFKBIA					SUPT20H		NRP1			GTF2H2C							LEF1	PRKCG	PPARA				CHEK2	CCNE1		PLCB3	CASP8	SHC1	PCYT1A		CCND1
	STAT5B			CREB3L2	STAT5B		COX7A1			CCND1			MYLK	FOS					TRAF6		PARD3			TAF9B							MYC	ITPR3	PLCE1				CHEK1	CHEK2		SRF	IL6	PRKCB	PCYT1B		PTPN11
	STAT5A			CREB3L3	STAT5A		COX7A2			CAMKK2			ADCY7	PARP4					PRKACB		NCK1			TAF5L							E2F2	ADCY7	EP300				CDKN2B	CHEK1		CREB3		PRKCD	PLD1		AKT2
	GRB2			CREM	PLCE1		ATP5PO			FOXO1			AKT1	DAB2IP					PRKCD		NCK2			CCNH							CSNK1A1L	CALML6	PDE10A				WEE1	MRE11		CREB5		GNB2	AKT1		CBL
	BRAF			PRKACB	BCL2		ATP5F1D			IRS2			CCND1	ENDOG					SH3GLB1		PTPN11										TP53	PRKACB	MAPK9				CDKN2A	ITPR3		PRKCE		AKT2	PIP5K1B		BAK1
	CCND1			PPP2R5D			ATP5F1E			PPP2R5A			AKT2	BAD					ATG10		ROCK1										CSNK1A1	MCU	PLD1				BUB1	BRF1		MYLK3		PRKCZ	AKT2		STAT5B
				ATF4			ATP5PF			CREB3L2			MEF2C	DFFB					ATG4B		ROCK2										E2F1		AKT1				RBL1	TP53		CREB1		WAS	GRB2		STAT5A
				ATF2			CALML6			CREB3L3			PPARGC1A	PARP3					ATG4A		GSK3B										ESR1		MAP2K1				BUB3	CALML6		AKT2		RELA	PDPK1		RUNX1
				PPP2R5A			ATP5PB			SREBF1			MEF2A	CHUK					ATG13		MET										CCND1		ROCK2				RAD21	LIN54		ITPR3		IKBKB			BRAF
				PPP2R5B			ATP5F1C			PPP2R5B			PRKACB	PIK3CD					ATG14		RHO										AKT2		CREB3L2				CDC25C	CACNA1D		GATA4		ADCY7			CTBP1
				PPP2R5C			SNCA			SCD				PARP2					ATG4D		ABLIM1										TCF7L2		CREB3L3				CDC25B	ATM		KCNMB3		ITK			CTBP2
							NDUFB11			PPP2R5D				NFKB1					PRKCQ		ROBO3										GSK3B		BRAF				ORC4	SMAD2		ADCY7		ROCK1
							ITPR3			PDPK1				ITPR3					TP53INP2		CFL2										PTEN		PRKACB				ORC5	SMAD3		AKT1		BAD
							IL1B			STRADA				LMNA					NRBF2												GRB2		PDE4A				E2F3	E2F5		VASP		GSK3B
							NDUFV3			STRADB				LMNB2					ATG4C												BRAF		PDE4B				ORC3	FBXW11		MAP2K1		STAT5B
							MT-ATP8			PPP2R5C				CASP7					MTMR4														CREBBP				SMAD2	FOXM1		ROCK2		GRB2
							APAF1							LMNB1					AKT1																		PTTG1	VDAC3		MEF2C		BRAF
							CAPN2							TP53					MTMR3																		APC2	IL1A		CREB3L3		PRKACB
							NDUFA6							CASP3					EIF2AK3																		SKP2	VDAC1		MEF2A		CHUK
							NDUFA7							AKT1					AKT2																		MDM2	TSC2		GUCY1B1		ELMO1
							NDUFA4							PTPN13					BAD																		PRKDC	TSC1		MEF2D		IKBKG
							NDUFA5							IKBKB					PTEN																		ANAPC5	HUS1		MYLK2
							CAPN1							EIF2AK3					ERN1																		ANAPC4	NBN		ATF4
							NDUFA1							BCL2A1					STX17																		ANAPC7	NFKB1		ATF2
							NDUFA8							AKT2					EIF2AK4																		CCNB3	CDKN1A
							NDUFA9							CASP8					PDPK1																		E2F5	RBL1
							COX4I2							PIDD1					ATG12																		E2F4	RBL2
							COX4I1							ERN1					PIK3CB																		TP53	ZFP36L1
							EIF2AK3							MAP3K14					BCL2																		E2F2	ZFP36L2
							ATP5PD							IL3																							E2F1	RELA
							ERN1							PDPK1																							CCND1	CDS1
							COX7C							AIFM1																							CDC26	MAP2K1
							COX5A							PIK3CB																							CCND3	IL6
							COX5B							MCL1																							CCND2	RAD50
							UQCR10																														STAG2	FOXO3
							UQCR11																														CDC14A	MAP2K2
							BAD																														GSK3B	FOXO1
							NDUFA3																														CCNE2	MAP2K6
							BID																														DBF4	MYBL2
							NDUFC1																														CREBBP	CCNA2
							NDUFC2																														CDS1	CCNA1
							MAPT																														CDC45	RB1
							RTN4																														RBX1	ETS1
							COX7A2L																														CDKN1C	CCNB3
							CASP7																														CCNH	SQSTM1
							CASP3																														TFDP2	CCNB1
							CASP8																														TFDP1	E2F4
							NDUFS4																															E2F3
							NDUFS5																															E2F2
							NDUFS6																															E2F1
							NDUFS7																															BTRC
							SDHC																															MCU
							SDHD
[truncated: 167 more columns]
