# Supplementary material for: Computational prediction of Homo sapiens–Candida albicans protein–protein interactions reveal key virulence factors using dual RNA-Seq data analysis
Source: Springer Nature journal article supplement (doi:10.1007/s00203-025-04312-4), 2025-04-06
Supplement: MOESM4 [file 203_2025_4312_MOESM4_ESM.xlsx]

## Sheet: KEGG pathways of fungal genes
Alanine, aspartate and glutamate metabolism	Aminoacyl-tRNA biosynthesis	Amino sugar and nucleotide sugar metabolism	Autophagy - yeast	Basal transcription factors	Base excision repair	Biosynthesis of amino acids	Biosynthesis of antibiotics	Biosynthesis of secondary metabolites	Butanoate metabolism	Carbon metabolism	Citrate cycle (TCA cycle)	DNA replication	Endocytosis	Fatty acid degradation	Fatty acid metabolism	Fructose and mannose metabolism	Glycolysis / Gluconeogenesis	Glyoxylate and dicarboxylate metabolism	Homologous recombination	Longevity regulating pathway - multiple species	Lysine degradation	Meiosis - yeast	Metabolic pathways	Methane metabolism	Mismatch repair	Mitophagy - yeast	mRNA surveillance pathway	Nucleotide excision repair	One carbon pool by folate	Oxidative phosphorylation	Pentose phosphate pathway	Peroxisome	Phagosome	Propanoate metabolism	Proteasome	Protein export	Protein processing in endoplasmic reticulum	Purine metabolism	Pyrimidine metabolism	Pyruvate metabolism	Ribosome biogenesis in eukaryotes	Ribosome	RNA polymerase	RNA transport	Selenocompound metabolism	Spliceosome	Steroid biosynthesis	Sulfur metabolism	Terpenoid backbone biosynthesis
GLN1	ALA1	NAG1	SEC18	RAD3	POL3	GLN1	ERG7	ERG7	ERG10	LSC2	kgd2	rfc4	SSA2	ALD5	ERG10	PMM1	ALD5	GLN1	POL3	SOD2	ALD5	TPK2	ERG7	GPM1	rfc4	CKA2	fal1	rfc4	CDC21	NAD1	PGI1	SOD2	act1	ACS1	RPT5	KAR2	KAR2	MET14	FUR1	MAE1	CRM1	RPS12	RPC40	CRM1	MES1	fal1	ERG7	MET14	ERG20
GFA1	MES1	UAP1	LCB2			GPM1	SDH2	LSC2		SDH2	SDH2	POL3	SEC4	ERG10		FBP1	ACS1	ACS1		TPK2	kgd2	SNF1	SDH2	ACS1	POL3	HOG1		RAD3		SDH2	FBP1	SOD1	SEC61	LSC2	PUP1	SRP54	YDJ1	HAM1	DUT1	ALD5	NEP1	RPL8B	RPA135	fal1		SSA2	ERG9		STE24
	FRS1	CBR1	TPK2			PGK1	ERG9	COQ5		ACS1	LSC2		ARC18				PGI1	ERG10		SSA2	ERG10	DLH1	ERG9	FBP1		SMD3		POL3		ATP9			TUB1	ERG10	PRE9	SEC61	SSA2	GUK1	URA3	ACS1	CKA2	RPS21	rpb7	GLE2		SMD3	ERG11		ERG10
	WRS1	GFA1	SNF1				FBP1	IMH3		MAE1			VPS4				GPM1			SOD1			LCB2							IPP1					PRE5		UBC4	ADK1	CDC21	ERG10	IMP4	RPL5	RPB11	GCD11
		PGI1					PMM1	ALD5		PGI1							FBP1						ltp1							NAD5					PRE6		SEC61	IMH3			NOG1	RPS22A		SMT3
		AGM1					UGP1	HEM13		GPM1							PGK1						MET14												PRE1		MNS1				NOG2	RPS28B
		PMM1					ADK1	SDH2		kgd2													PMM1														SAR1				PWP2	RPL23A
		UGP1					PGI1	ERG9		FBP1													UGP1																		GAR1	RPS4A
							ERG20	ADK1		ERG10													GFA1																			RPS26A
							kgd2	PGI1		PGK1													NAG1																			RPS19A
							PGK1	ERG20															MES1																			RPS27A
							LSC2	kgd2															ADK1																			RPL9B
							ERG10	FBP1															PGI1																			RPS17B
							ALD5	ERG10															ERG20																			RPS1
							UAP1	ERG11															kgd2																			RPS7A
							ACS1	ACS1															PGK1																			RPS6A
							GFA1	GPM1															ATP9																			RPL20B
							INO1	PMM1															HEM13																			RPL28
							STE24	PGK1															LSC2
							GPM1																SPT14
							AGM1																ALD5
							ERG11																UAP1
																							ACS1
																							MNS1
																							GUK1
																							NAD1
																							URA3
																							FUR1
																							INO1
																							HAM1
																							DUT1
																							IMH3
																							AGM1
																							CDC21
																							GPM1
																							ERG10
																							ERG11
																							COQ5
																							GLN1
																							NAD5
																							FBP1
[truncated: 3 more columns]
